# Supplementary material for: Anti-Food Allergic Compounds from Penicillium griseofulvum MCCC 3A00225, a Deep-Sea-Derived Fungus
Source: MDPI journal article supplement (doi:10.3390/md19040224), 2021-04-16
Supplement: s1 [file s1]

## Supplementary Material

# Anti-Food Allergic Compounds from *Penicillium griseofulvum* MCCC 3A00225, a Deep-Sea-Derived Fungus

Cui-Ping Xing<sup>1</sup>, Dan Chen<sup>2</sup>, Chun-Lan Xie<sup>1</sup>, Qingmei Liu<sup>3</sup>, Tian-Hua Zhong<sup>1</sup>, Zongze Shao<sup>1</sup>, Guangming Liu<sup>3</sup>, Lian-Zhong Luo<sup>2,\*</sup> and Xian-Wen Yang<sup>1,\*</sup>

<sup>1</sup> Key Laboratory of Marine Biogenetic Resources, Third Institute of Oceanography, Ministry of Natural Resources, 184 Daxue Road, Xiamen 361005, China; xingcui ping123@126.com (C.-P. X.); xiechunlanxx@163.com (C.-L.X.); zhongtianhua@tio.org.cn (T.-H. Z.); shaozongze@tio.org.cn (Z. S.)

<sup>2</sup> Fujian Universities and colleges engineering research center of marine biopharmaceutical resources, Xiamen Medical College, 1999 Guankouzhong Road, Xiamen 361023, China; cd@xmmc.edu.cn (D.C.)

<sup>3</sup> College of Food and Biological Engineering, Jimei University, 43 Yindou Road, Xiamen 361021, Fujian, P. R. China; 435782572@qq.com (Q.L.); gmliu@jmu.edu.cn (G.L.)

## Content

**Figure S1.** <sup>1</sup>H NMR spectrum of **1** in CD<sub>3</sub>OD.

**Figure S2.** <sup>13</sup>C NMR spectrum of **1** in CD<sub>3</sub>OD.

**Figure S3.** HSQC NMR spectrum of **1** in CD<sub>3</sub>OD.

**Figure S4.** COSY NMR spectrum of **1** in CD<sub>3</sub>OD.

**Figure S5.** HMBC NMR spectrum of **1** in CD<sub>3</sub>OD.

**Figure S6.** NOESY NMR spectrum of **1** in CD<sub>3</sub>OD.

**Figure S7.** <sup>1</sup>H NMR spectrum of **2** in CD<sub>3</sub>OD.

**Figure S8.** <sup>13</sup>C NMR spectrum of **2** in CD<sub>3</sub>OD.

**Figure S9.** HSQC NMR spectrum of **2** in CD<sub>3</sub>OD.

**Figure S10.** COSY NMR spectrum of **2** in CD<sub>3</sub>OD.

**Figure S11.** HMBC NMR spectrum of **2** in CD<sub>3</sub>OD.

**Figure S12.** NOESY NMR spectrum of **2** in CD<sub>3</sub>OD.

**Figure S13.** <sup>1</sup>H NMR spectrum of **3** in CD<sub>3</sub>OD.

**Figure S14.** <sup>13</sup>C NMR spectrum of **3** in CD<sub>3</sub>OD.

**Figure S15.** HSQC NMR spectrum of **3** in CD<sub>3</sub>OD.

**Figure S16.** COSY NMR spectrum of **3** in CD<sub>3</sub>OD.

**Figure S17.** HMBC NMR spectrum of **3** in CD<sub>3</sub>OD.

**Figure S18.** NOESY NMR spectrum of **3** in CD<sub>3</sub>OD.

**Figure S19.** <sup>1</sup>H NMR spectrum of **4** in CD<sub>3</sub>OD.

**Figure S20.** <sup>13</sup>C NMR spectrum of **4** in CD<sub>3</sub>OD.

**Figure S21.** HSQC NMR spectrum of **4** in CD<sub>3</sub>OD.

**Figure S22.** COSY NMR spectrum of **4** in CD<sub>3</sub>OD.

**Figure S23.** HMBC NMR spectrum of **4** in CD<sub>3</sub>OD.

**Figure S24.** NOESY NMR spectrum of **4** in CD<sub>3</sub>OD.

**Figure S25.** <sup>1</sup>H NMR spectrum of **5** in CD<sub>3</sub>OD.

**Figure S26.** <sup>13</sup>C NMR spectrum of **5** in CD<sub>3</sub>OD.

**Figure S27.** HSQC NMR spectrum of **5** in CD<sub>3</sub>OD.

**Figure S28.** COSY NMR spectrum of **5** in CD<sub>3</sub>OD.

**Figure S29.** HMBC NMR spectrum of **5** in CD<sub>3</sub>OD.

**Figure S30.** NOESY NMR spectrum of **5** in CD<sub>3</sub>OD.

**Figure S31.** <sup>1</sup>H NMR spectrum of **6** in CD<sub>3</sub>OD.

**Figure S32.** <sup>13</sup>C NMR spectrum of **6** in CD<sub>3</sub>OD.

**Figure S33.** HSQC NMR spectrum of **6** in CD<sub>3</sub>OD.

**Figure S34.** COSY NMR spectrum of **6** in CD<sub>3</sub>OD.

**Figure S35.** HMBC NMR spectrum of **6** in CD<sub>3</sub>OD.

**Figure S36.** NOESY NMR spectrum of **6** in CD<sub>3</sub>OD.

**Figure S37.** <sup>1</sup>H NMR spectrum of **7** in DMSO-*d*<sub>6</sub>.

**Figure S38.** <sup>13</sup>C NMR spectrum of **7** in DMSO-*d*<sub>6</sub>.

**Figure S39.** HSQC NMR spectrum of **7** in DMSO-*d*<sub>6</sub>.

**Figure S40.** COSY NMR spectrum of **7** in DMSO-*d*<sub>6</sub>.

**Figure S41.** HMBC NMR spectrum of **7** in DMSO-*d*<sub>6</sub>.

**Figure S42.** NOESY NMR spectrum of **7** in DMSO-*d*<sub>6</sub>.

**Figure S43.** <sup>1</sup>H NMR spectrum of **8** in CD<sub>3</sub>OD.

**Figure S44.** <sup>13</sup>C NMR spectrum of **8** in CD<sub>3</sub>OD.

**Figure S45.** HSQC NMR spectrum of **8** in CD<sub>3</sub>OD.

**Figure S46.** COSY NMR spectrum of **8** in CD<sub>3</sub>OD.

**Figure S47.** HMBC NMR spectrum of **8** in CD<sub>3</sub>OD.

**Figure S48.** NOESY NMR spectrum of **8** in CD<sub>3</sub>OD.

**Figure S49.** <sup>1</sup>H NMR spectrum of **9** in CD<sub>3</sub>OD.

**Figure S50.** <sup>13</sup>C NMR spectrum of **9** in CD<sub>3</sub>OD.

**Figure S51.** HSQC NMR spectrum of **9** in CD<sub>3</sub>OD.

**Figure S52.** COSY NMR spectrum of **9** in CD<sub>3</sub>OD.

**Figure S53.** HMBC NMR spectrum of **9** in CD<sub>3</sub>OD.

**Figure S54.** NOESY NMR spectrum of **9** in CD<sub>3</sub>OD.

**Figure S55.** <sup>1</sup>H NMR spectrum of **10** in CD<sub>3</sub>OD.

**Figure S56.** <sup>13</sup>C NMR spectrum of **10** in CD<sub>3</sub>OD.

**Figure S57.** HSQC NMR spectrum of **10** in CD<sub>3</sub>OD.

**Figure S58.** COSY NMR spectrum of **10** in CD<sub>3</sub>OD.

**Figure S59.** HMBC NMR spectrum of **10** in CD<sub>3</sub>OD.

**Figure S60.** NOESY NMR spectrum of **10** in CD<sub>3</sub>OD.

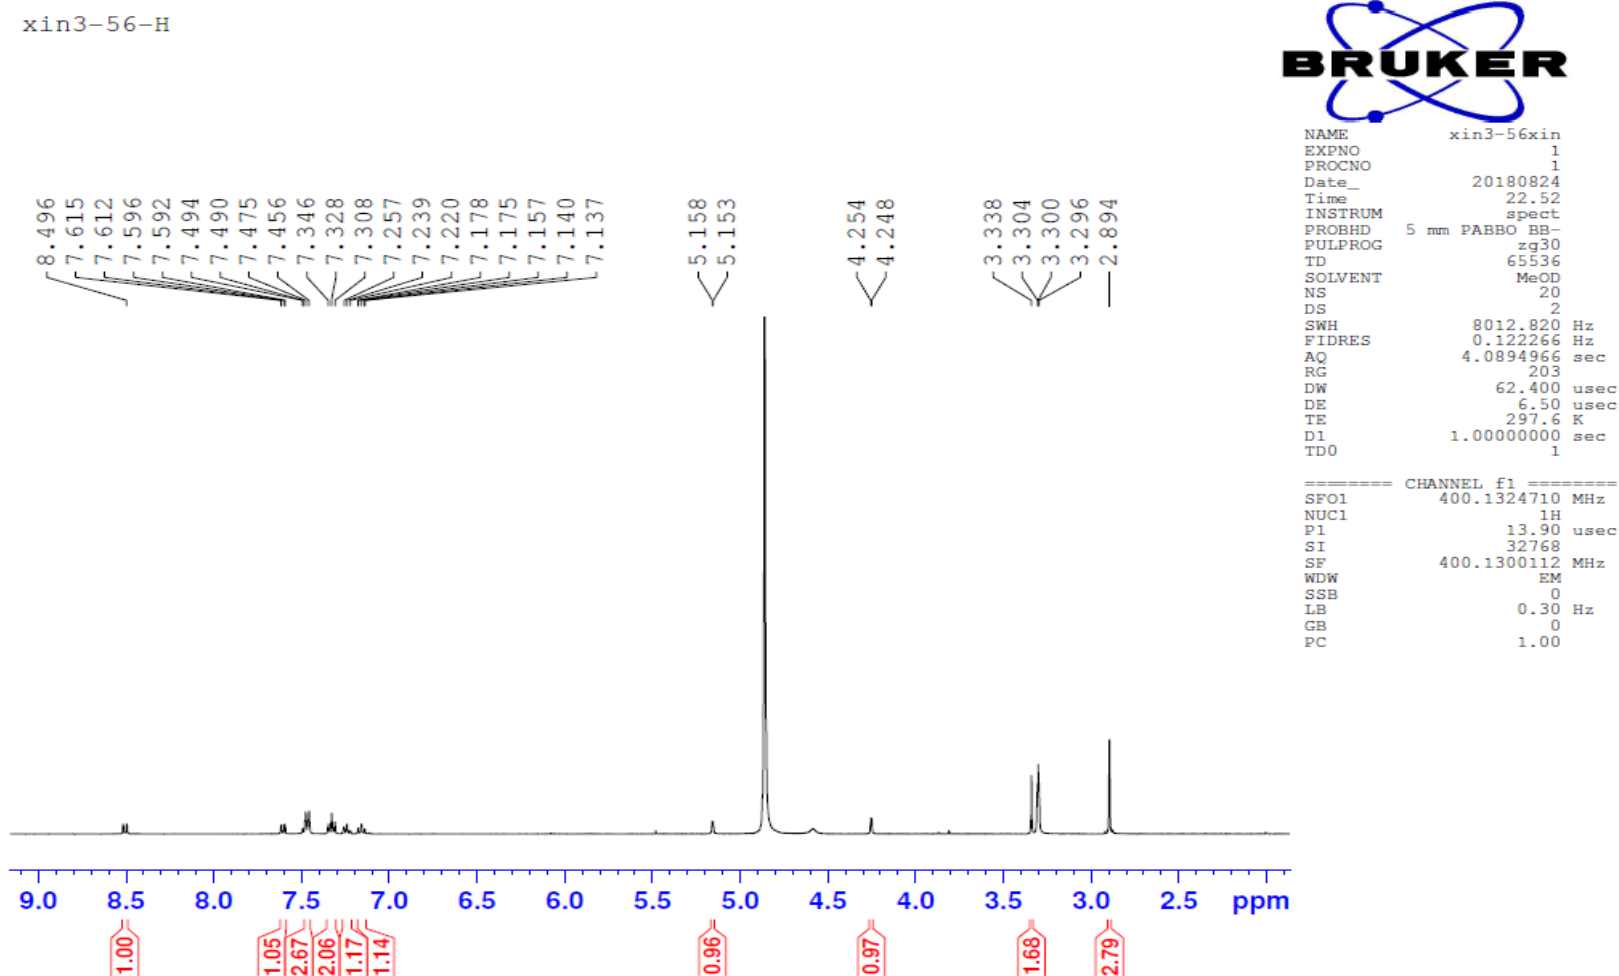**Figure S1.**  $^1\text{H}$  NMR spectrum of **1** in  $\text{CD}_3\text{OD}$ .

xin3-56C

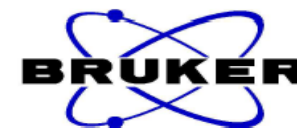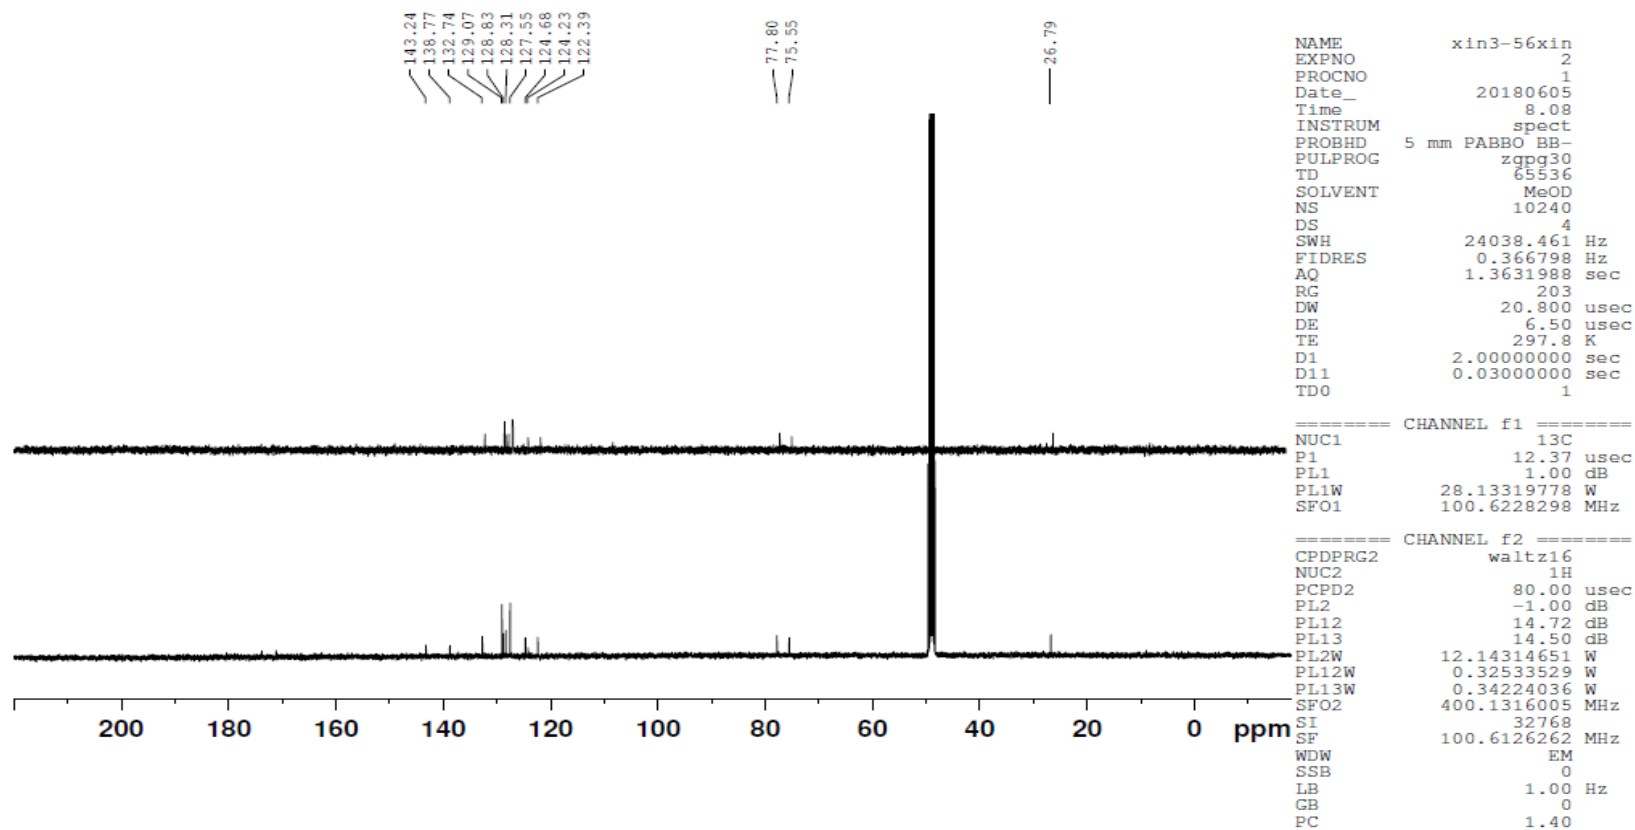

**Figure S2.**  $^{13}\text{C}$  NMR spectrum of **1** in  $\text{CD}_3\text{OD}$ . (两个 170 多的位置未标出)

xin3-56-qc

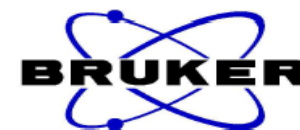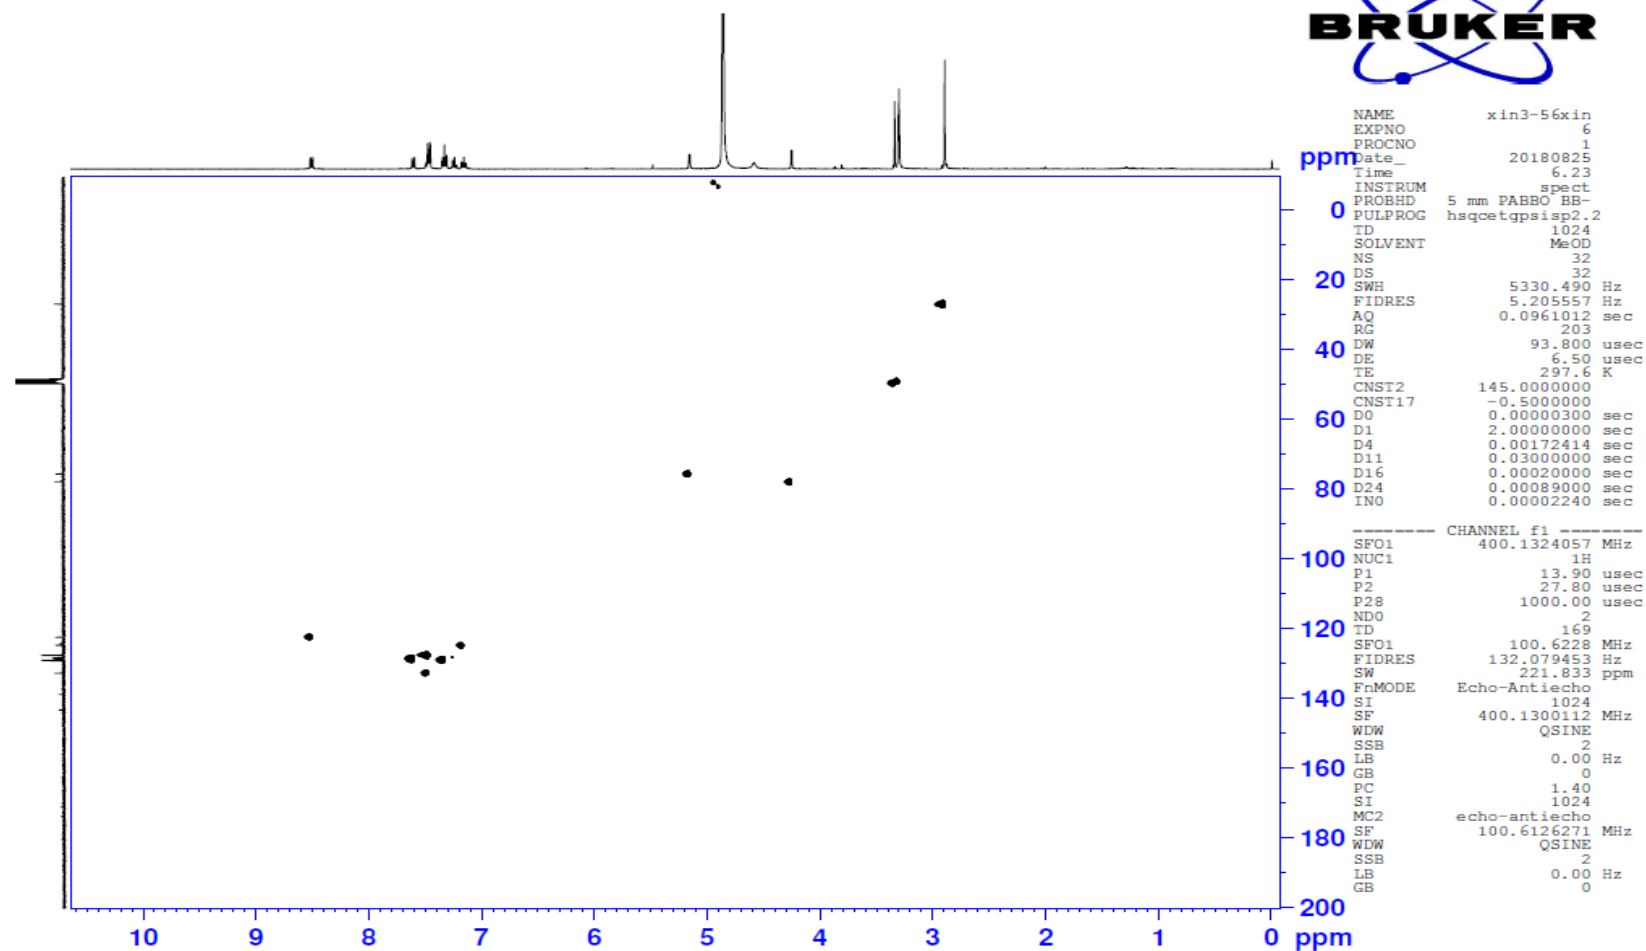Figure S3. HSQC NMR spectrum of **1** in CD<sub>3</sub>OD.

xin3-56-COSY

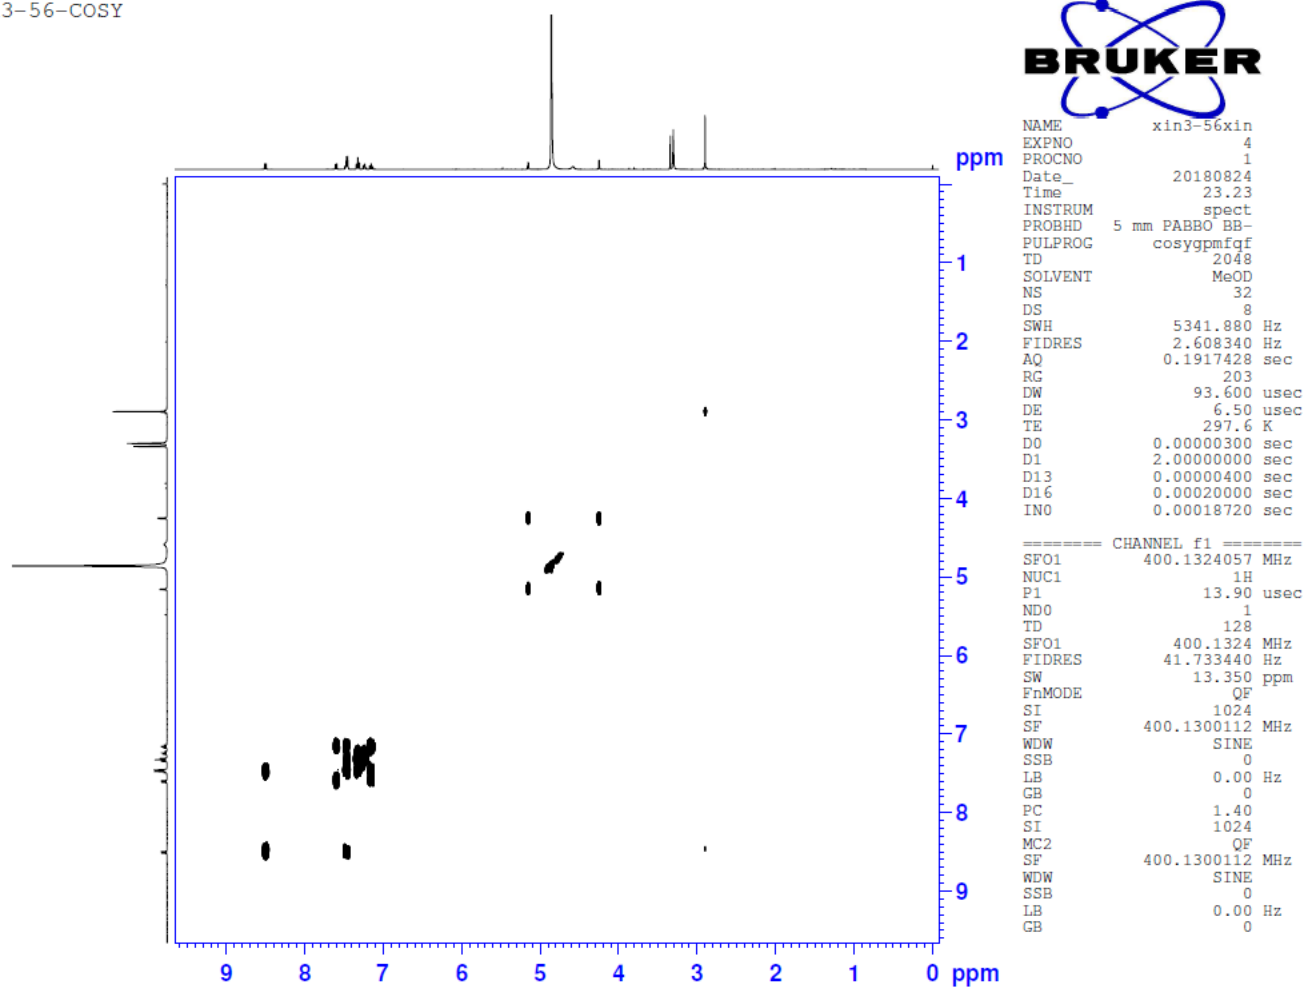**Figure S4.** COSY NMR spectrum of **1** in CD<sub>3</sub>OD.

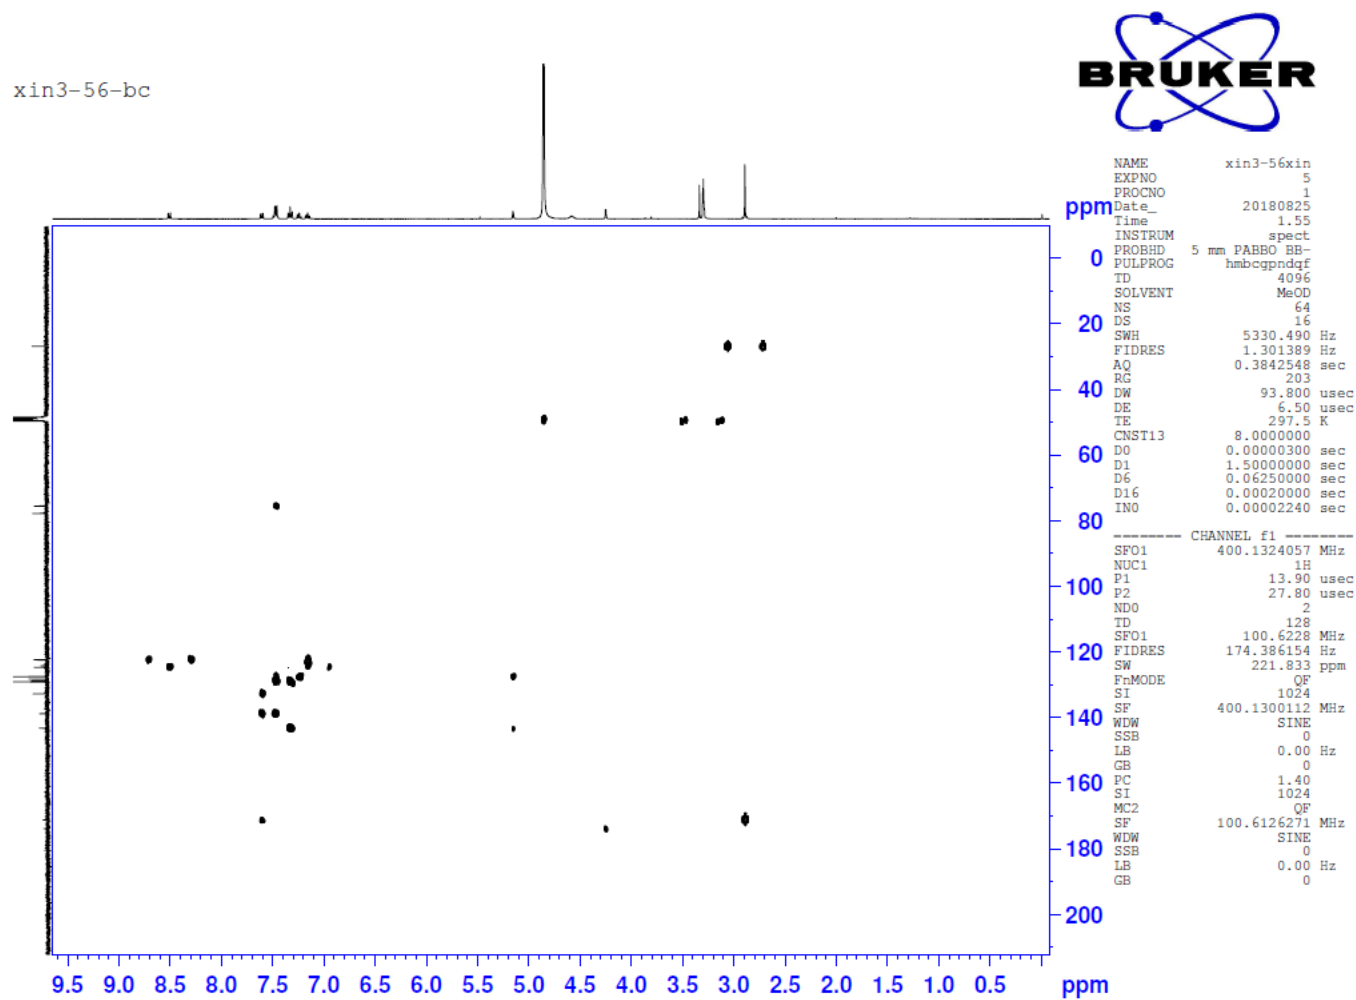Figure S5. HMBC NMR spectrum of **1** in CD<sub>3</sub>OD.

xin3-56-NOE

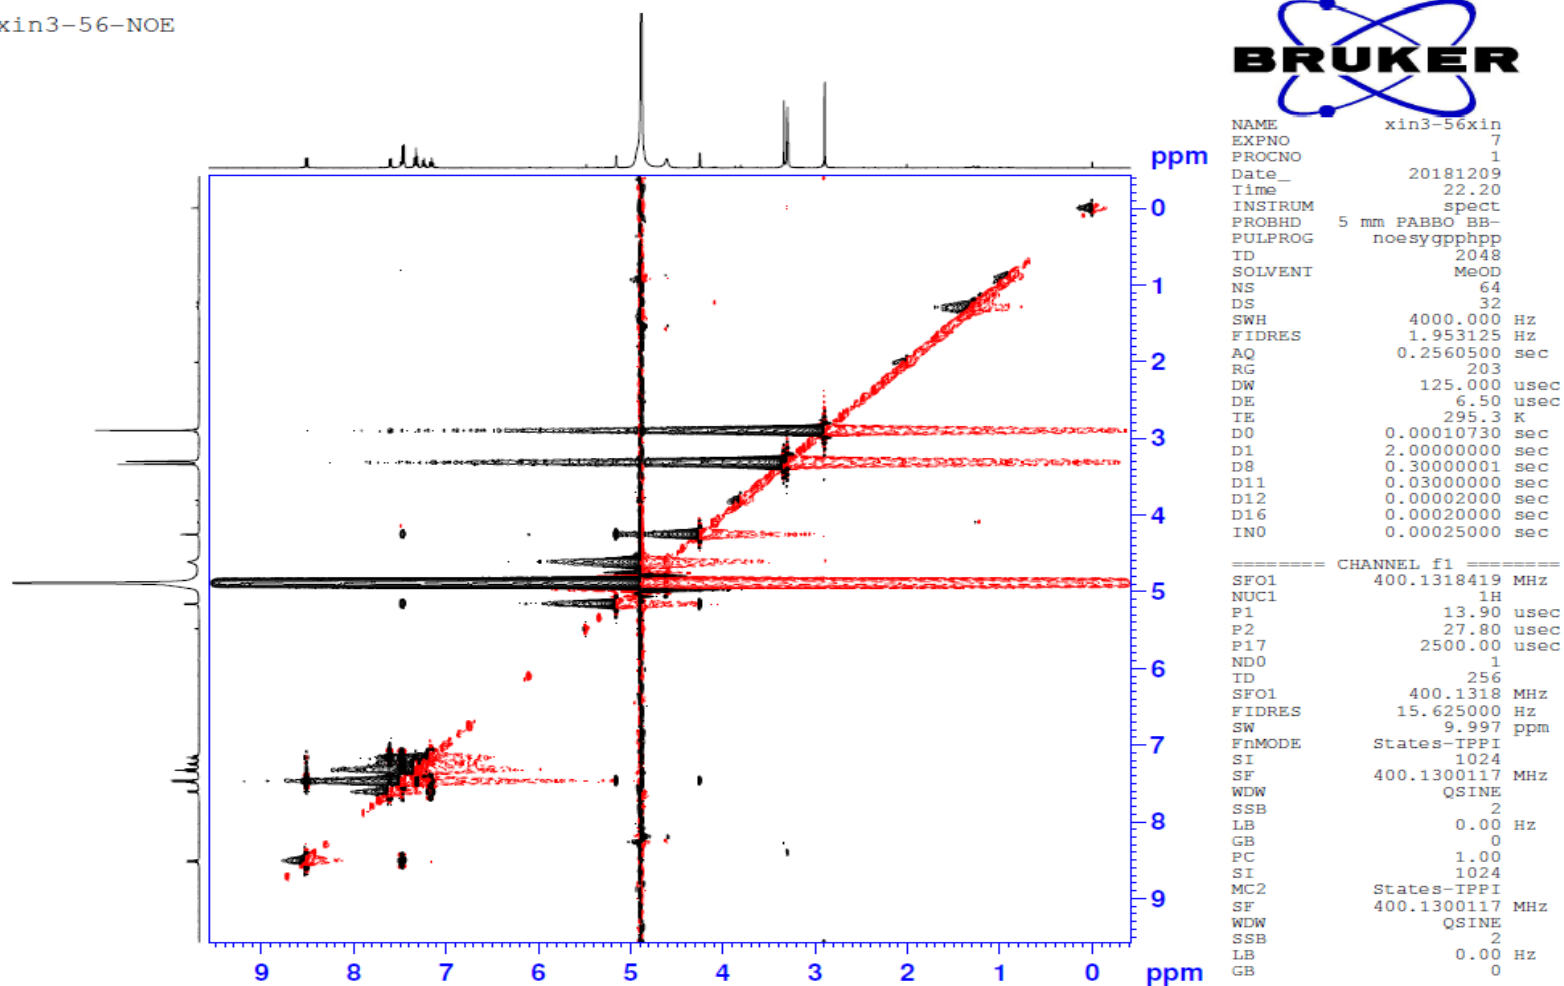Figure S6. NOESY NMR spectrum of **1** in CD<sub>3</sub>OD.



xin3-90 H

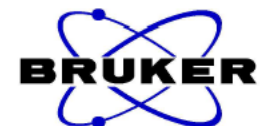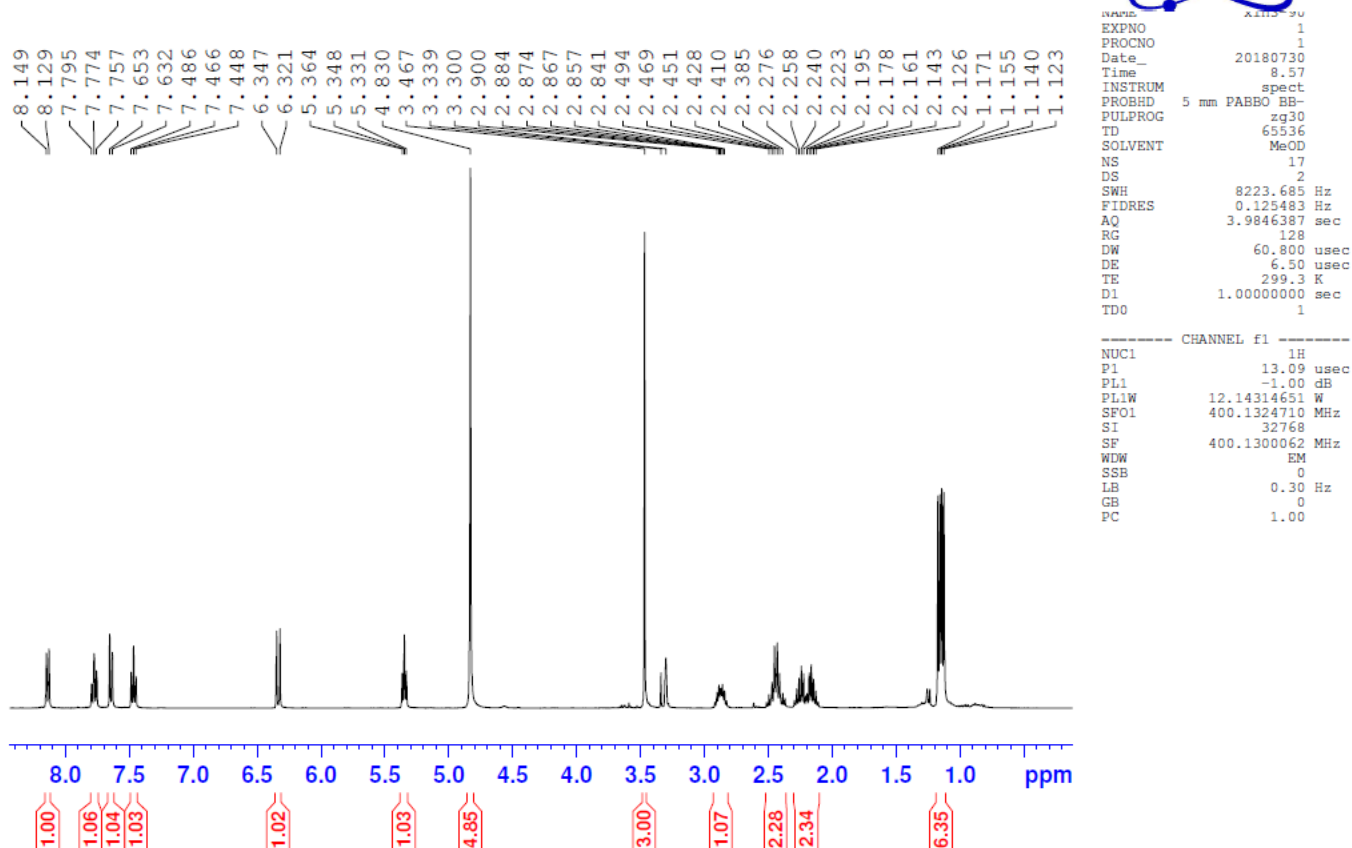Figure S7.  $^1\text{H}$  NMR spectrum of **2** in  $\text{CD}_3\text{OD}$ .

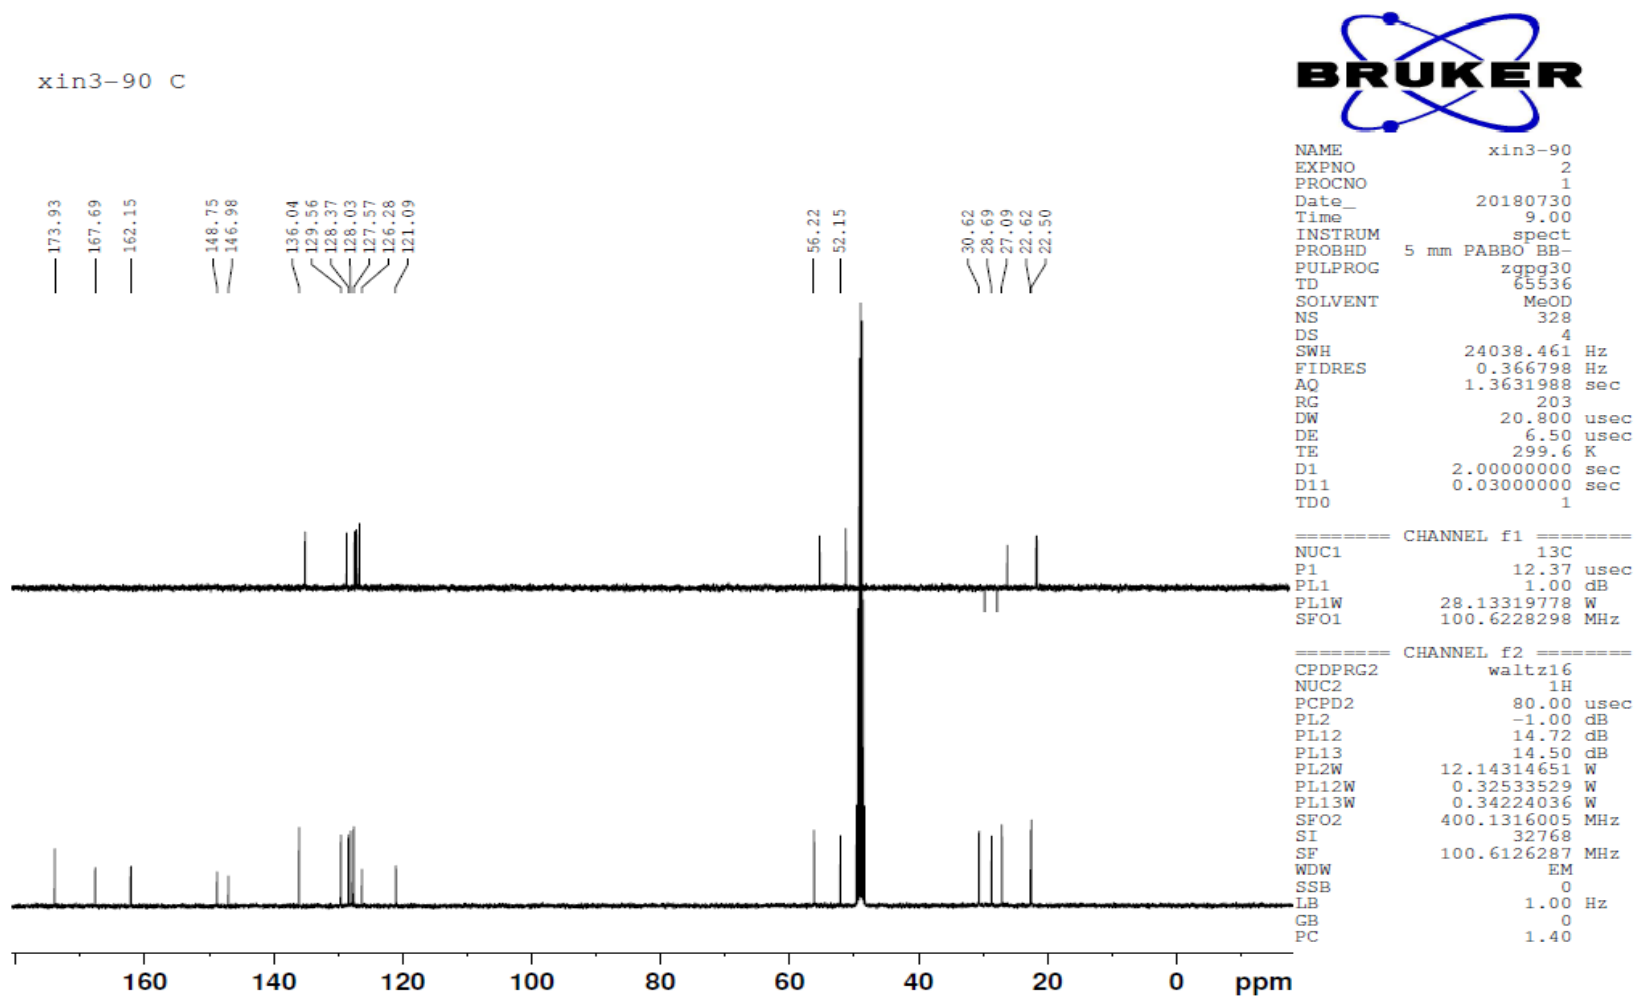Figure S8.  $^{13}\text{C}$  NMR spectrum of **2** in  $\text{CD}_3\text{OD}$ .

xin3-90-QC

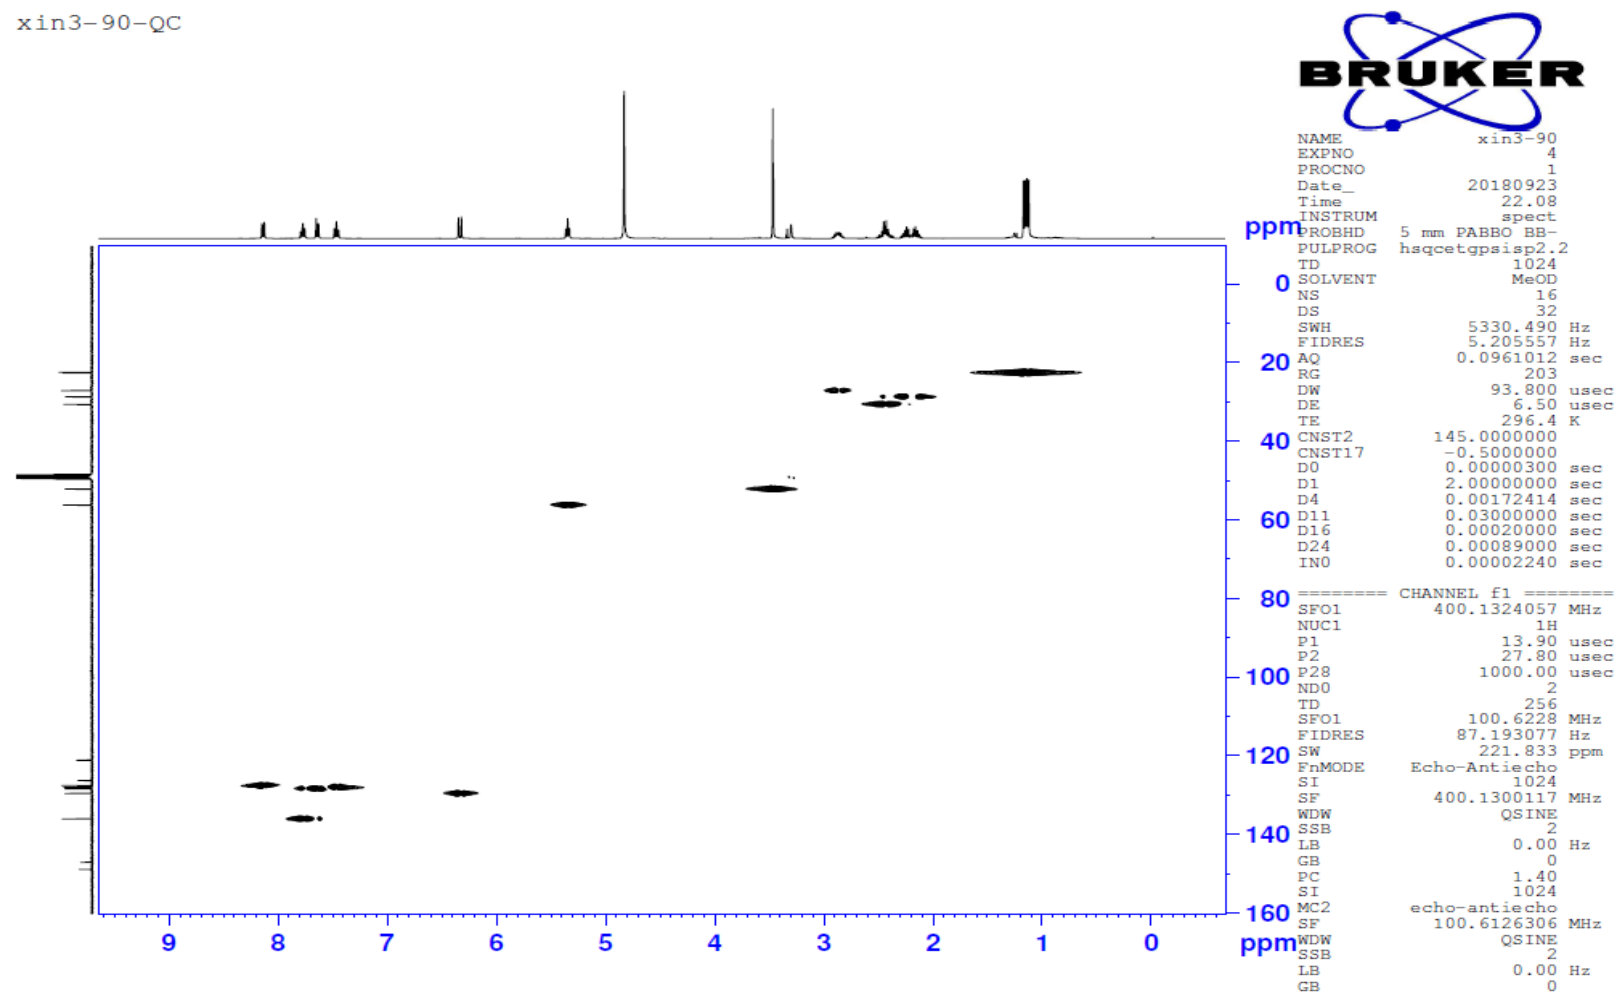Figure S9. HSQC NMR spectrum of **2** in CD<sub>3</sub>OD.

xin3-90-COSY

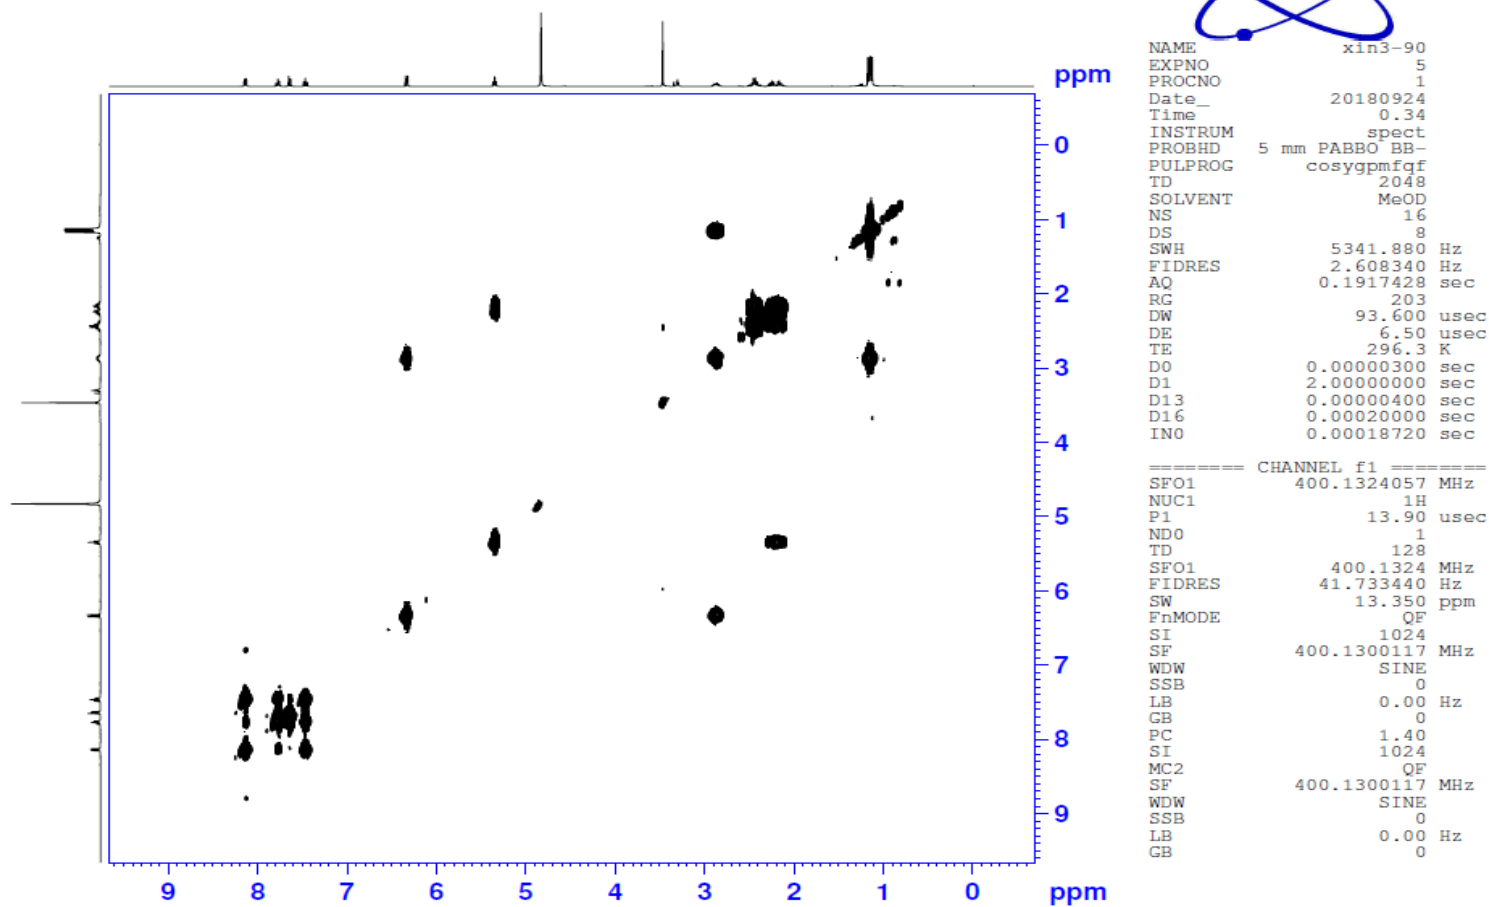Figure S10. COSY NMR spectrum of **2** in CD<sub>3</sub>OD.

xin3-90-BC

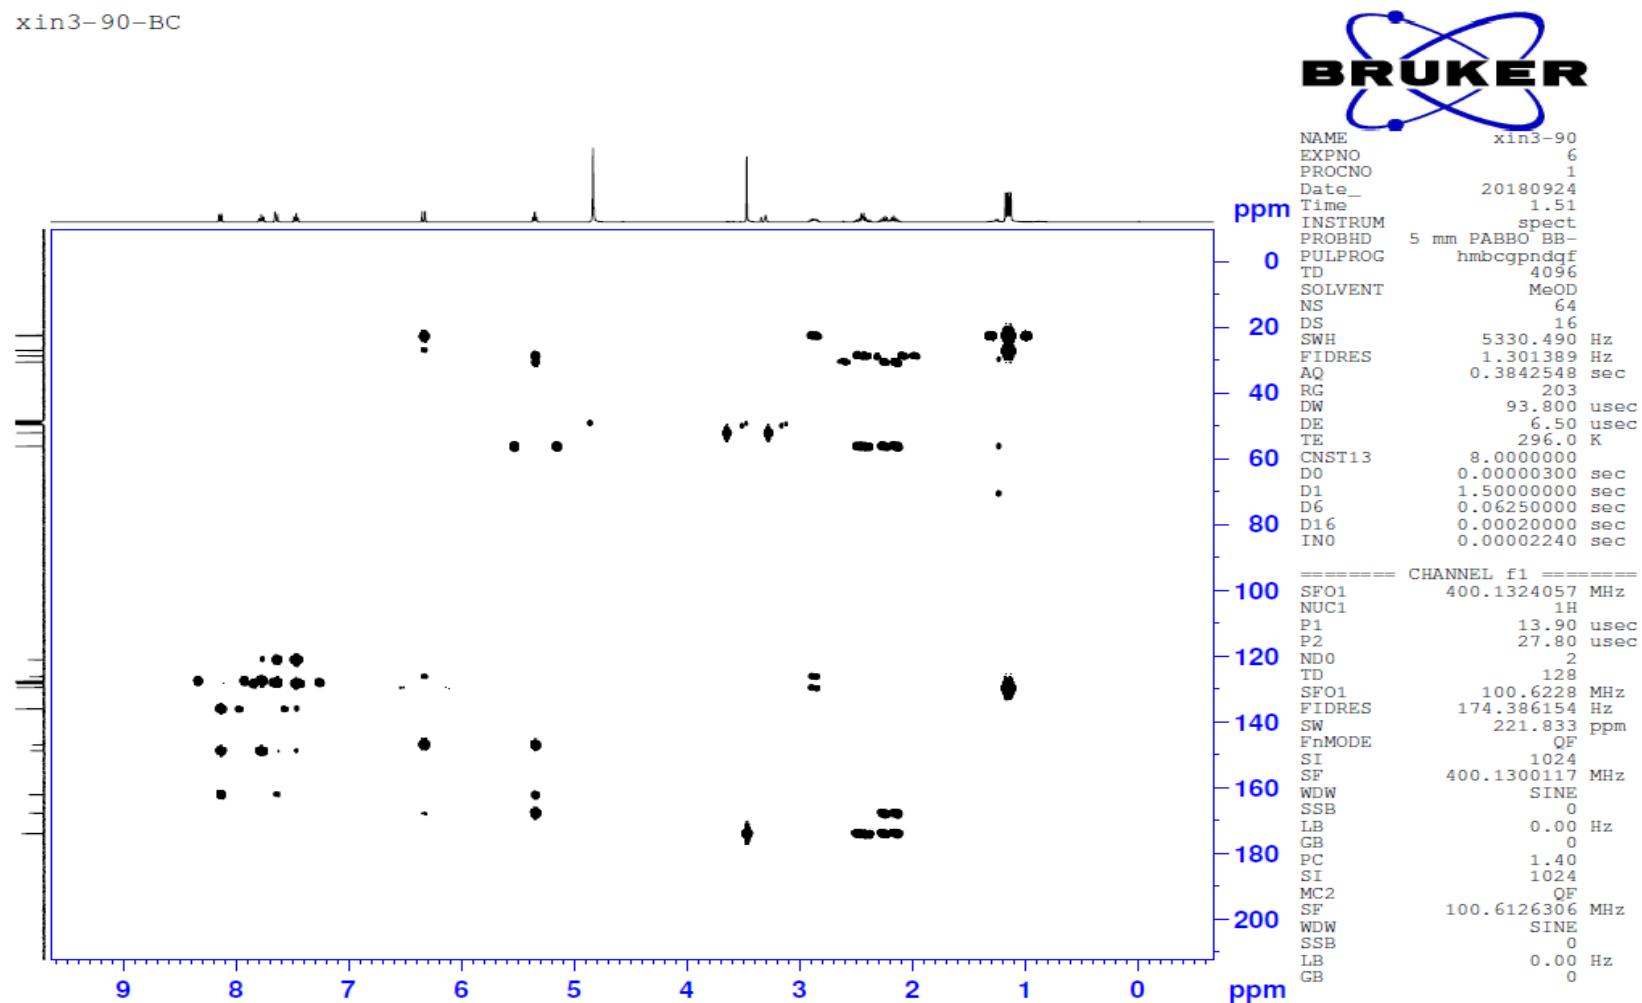Figure S11. HMBC NMR spectrum of **2** in CD<sub>3</sub>OD.

xin3-90-NOE

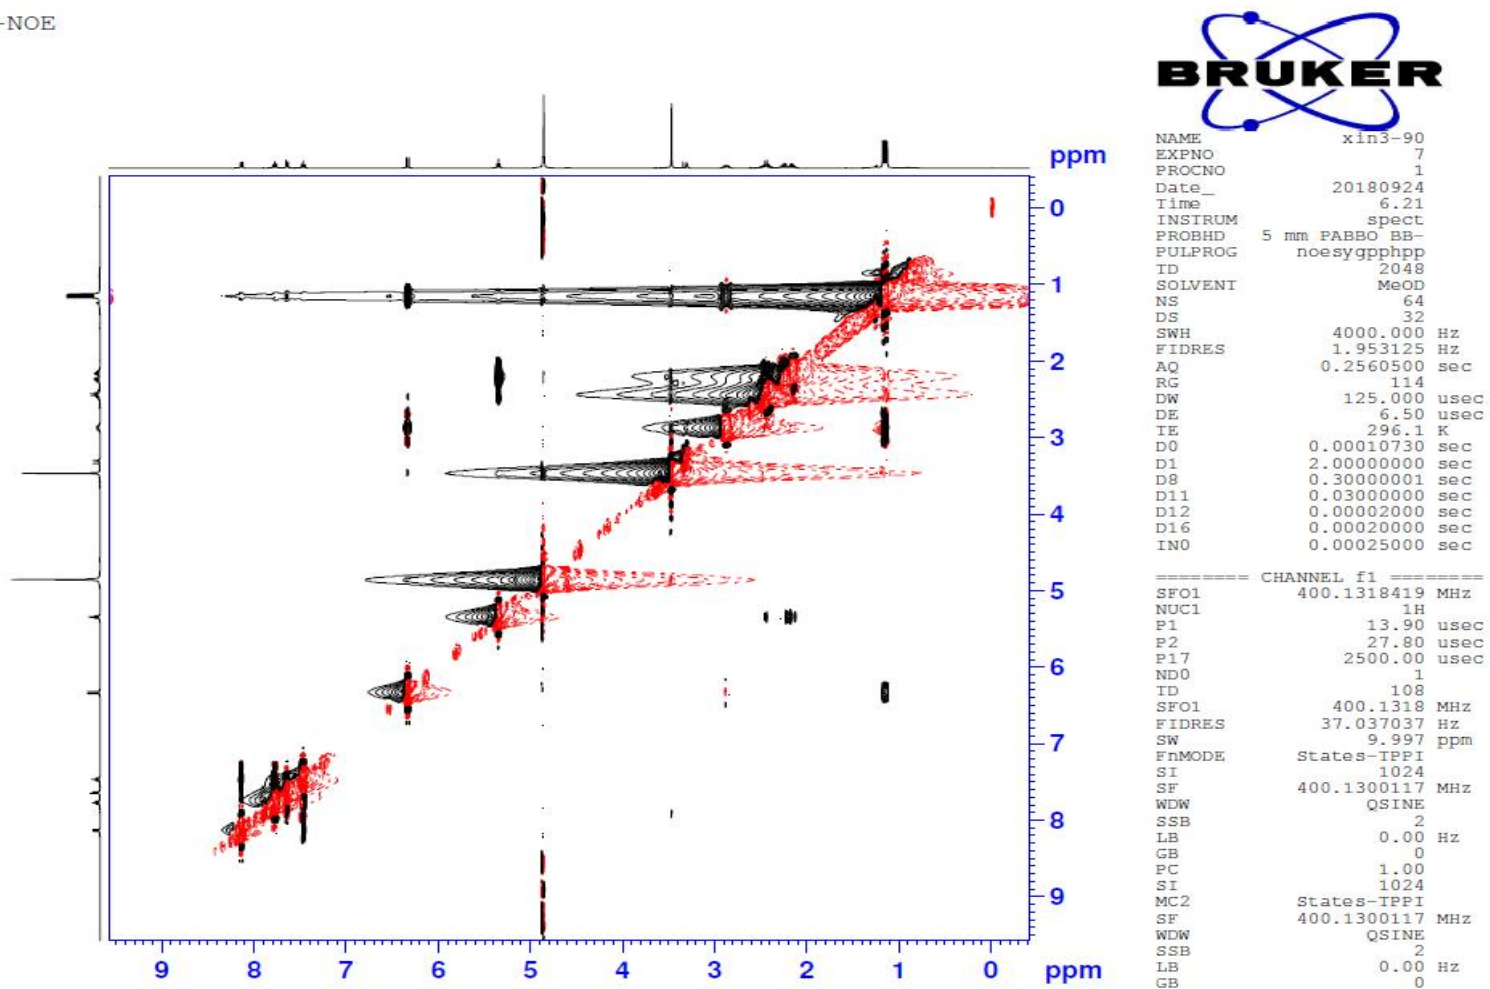Figure S12. NOESY NMR spectrum of **2** in CD<sub>3</sub>OD.

xin3-108-H

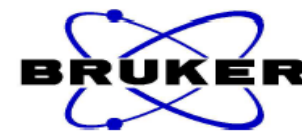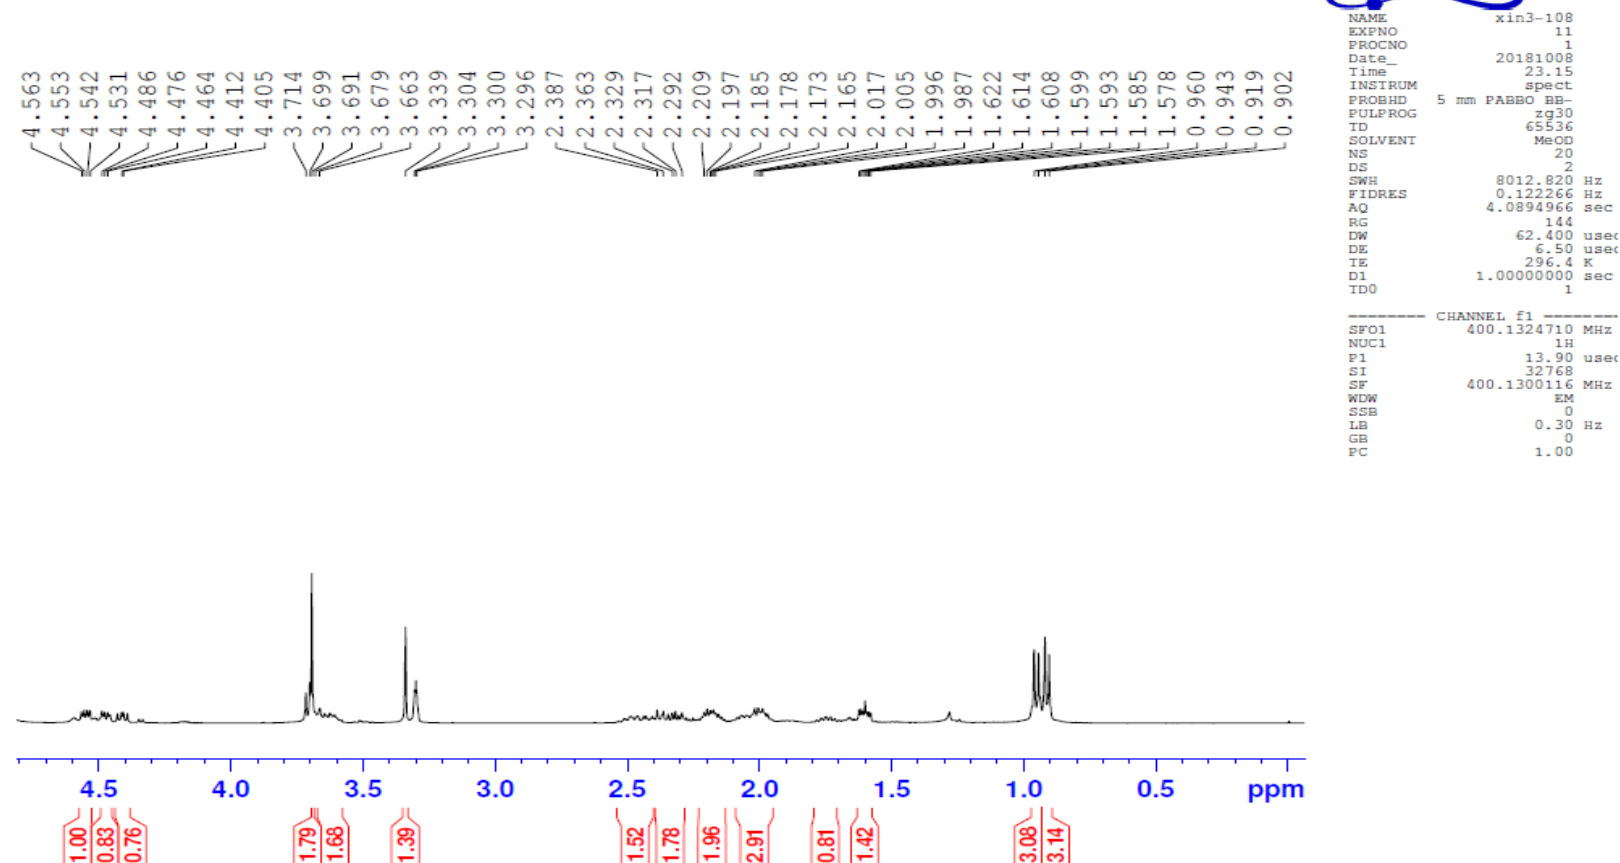Figure S13.  $^1\text{H}$  NMR spectrum of **3** in  $\text{CD}_3\text{OD}$ .

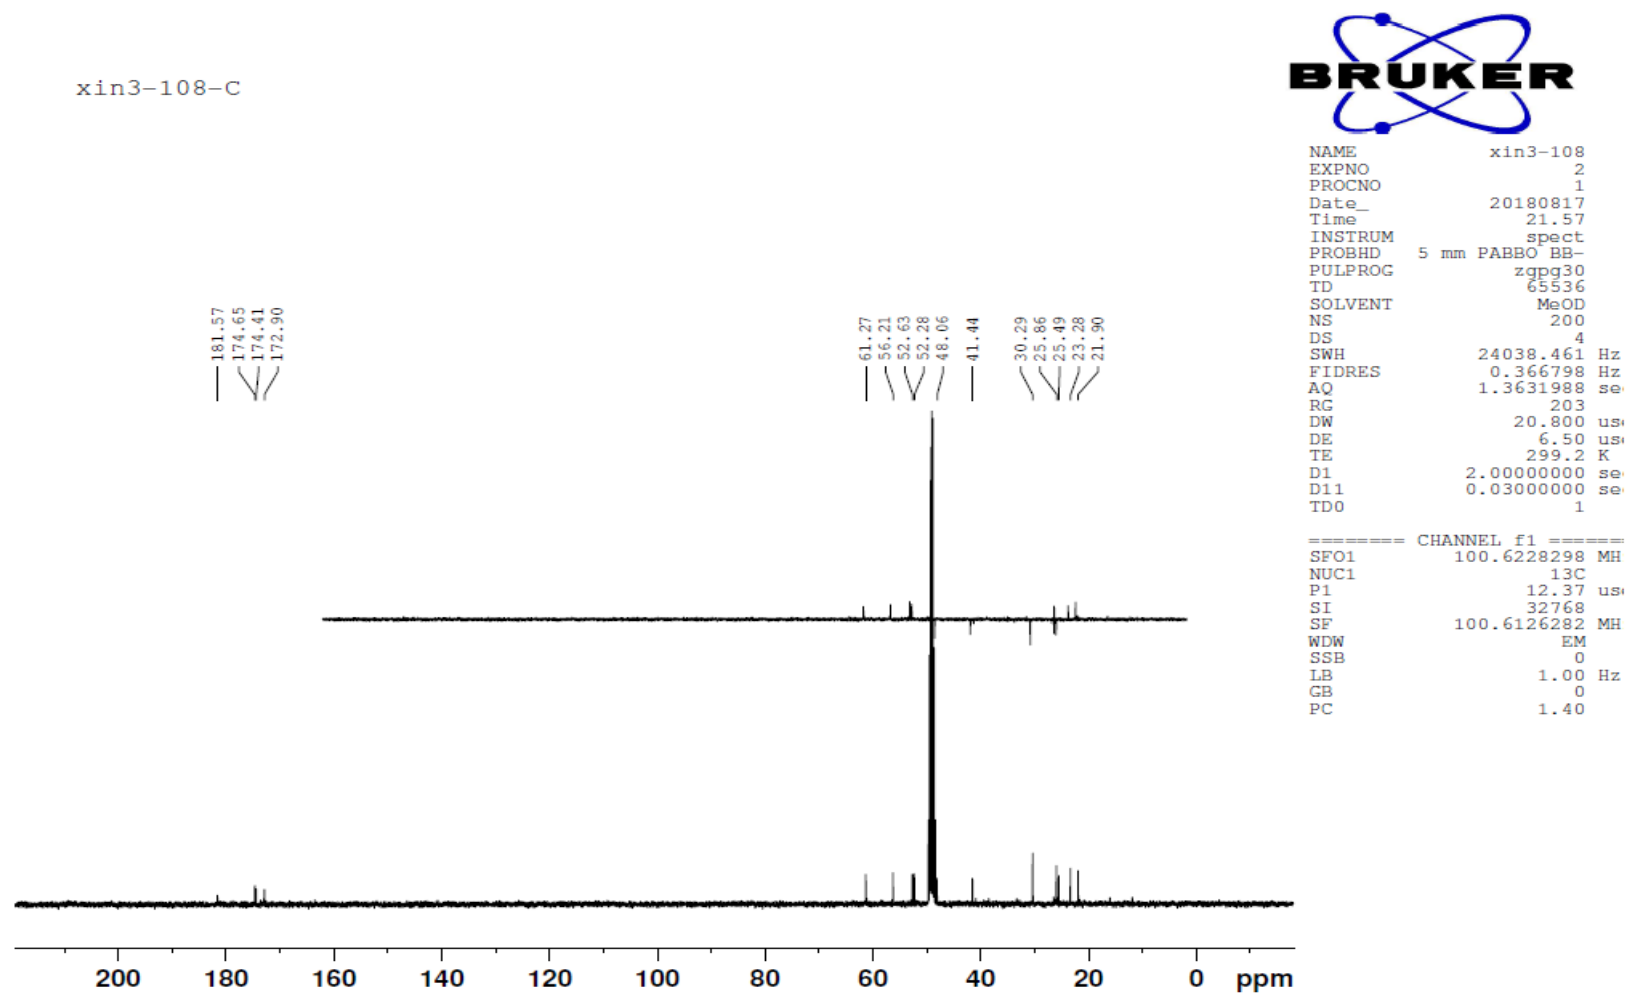

**Figure S14.**  $^{13}\text{C}$  NMR spectrum of **3** in  $\text{CD}_3\text{OD}$ .



xin3-108-QC

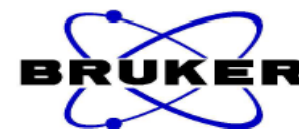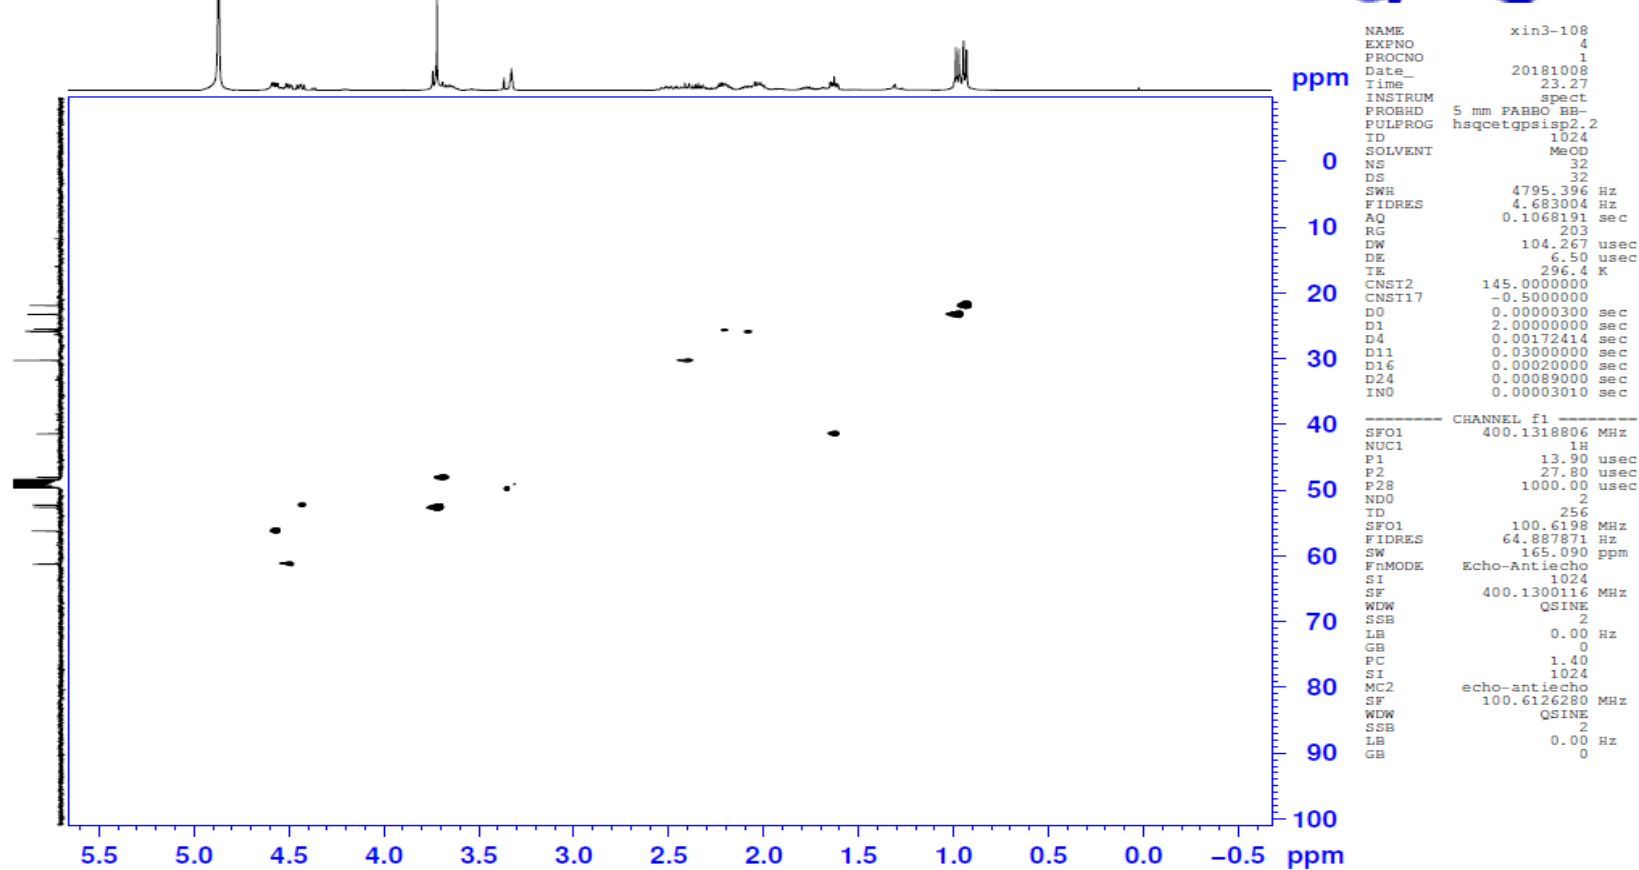Figure S15. HSQC NMR spectrum of **3** in CD<sub>3</sub>OD.

xin3-108-COSY

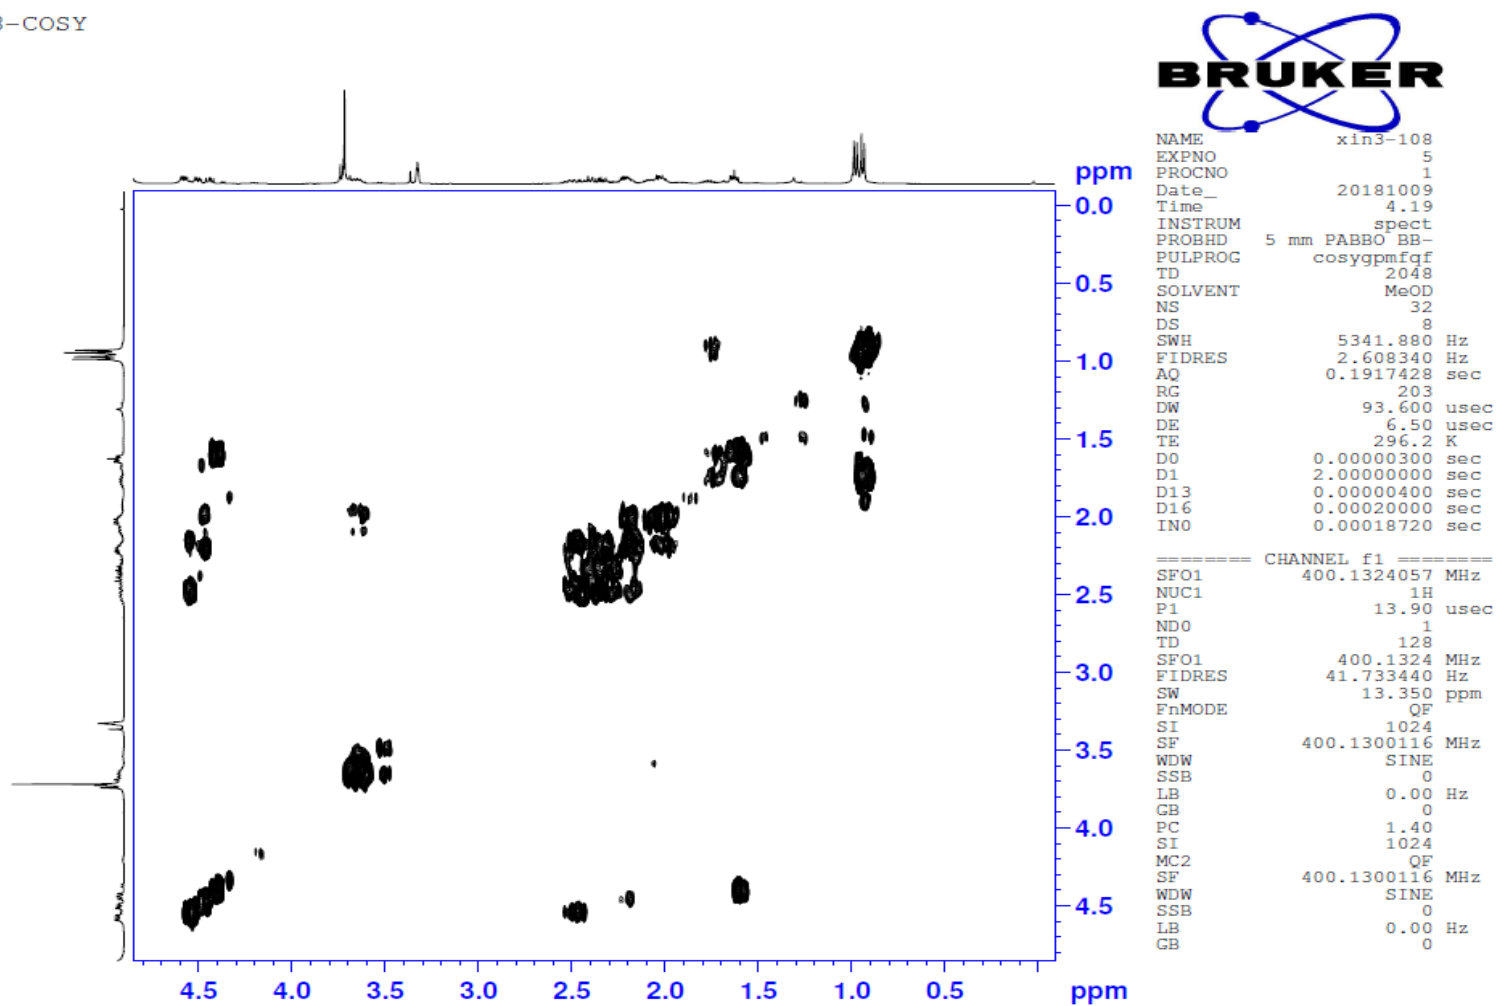Figure S16. COSY NMR spectrum of **3** in CD<sub>3</sub>OD.

xin3-108-BC

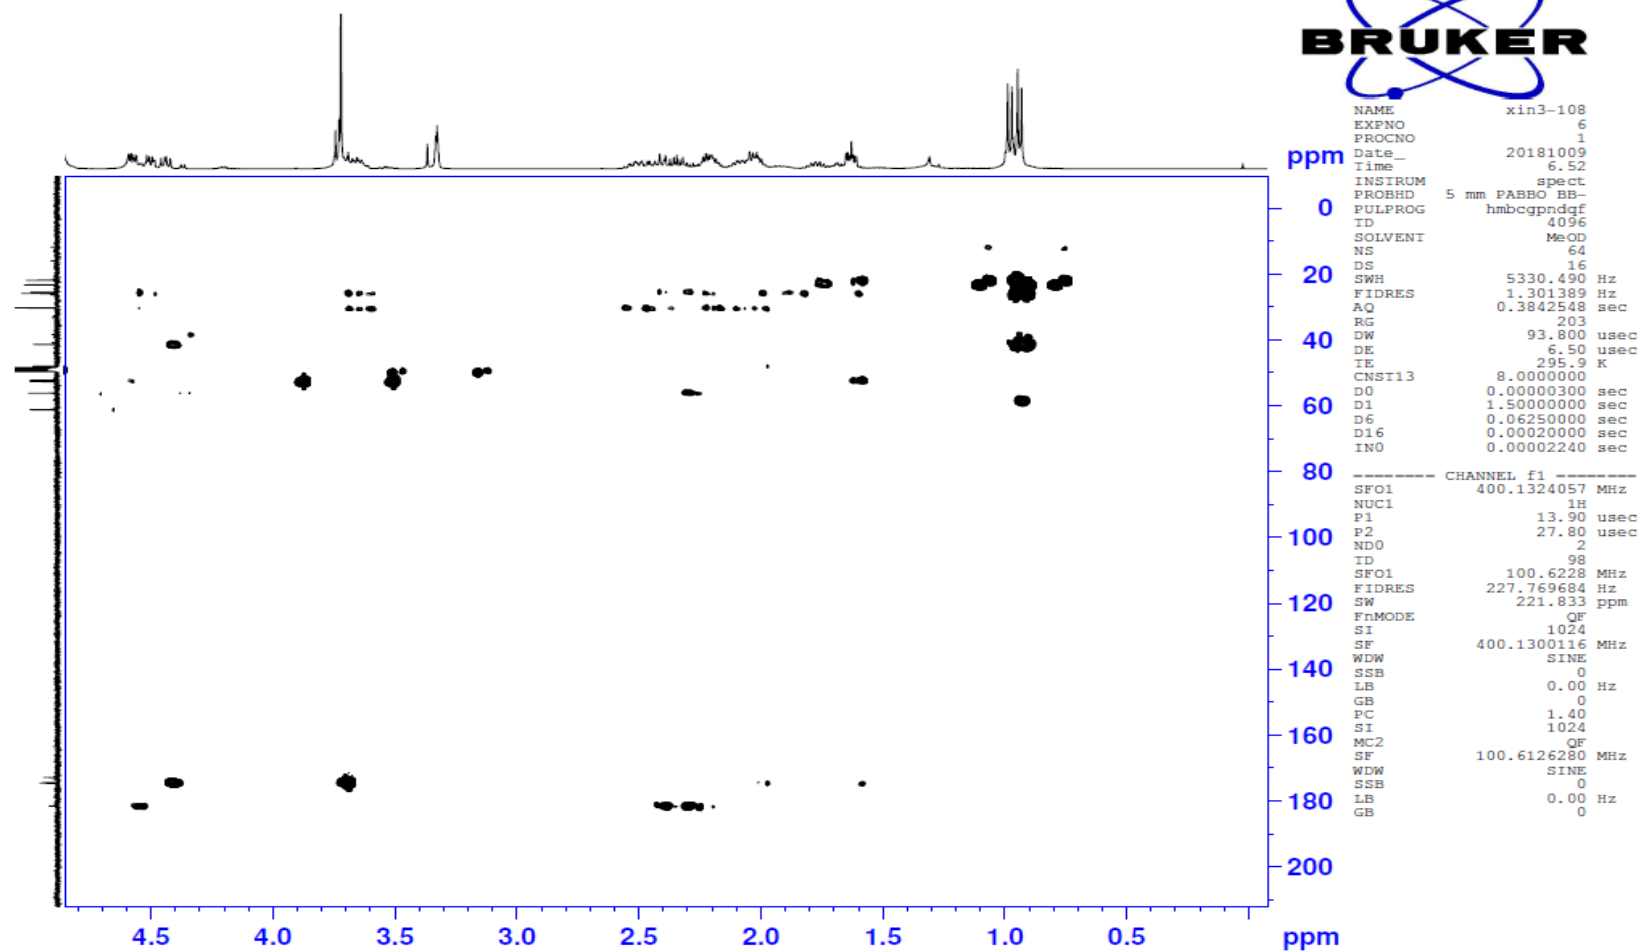Figure S17. HMBC NMR spectrum of **3** in CD<sub>3</sub>OD.

xin3-108-NOE

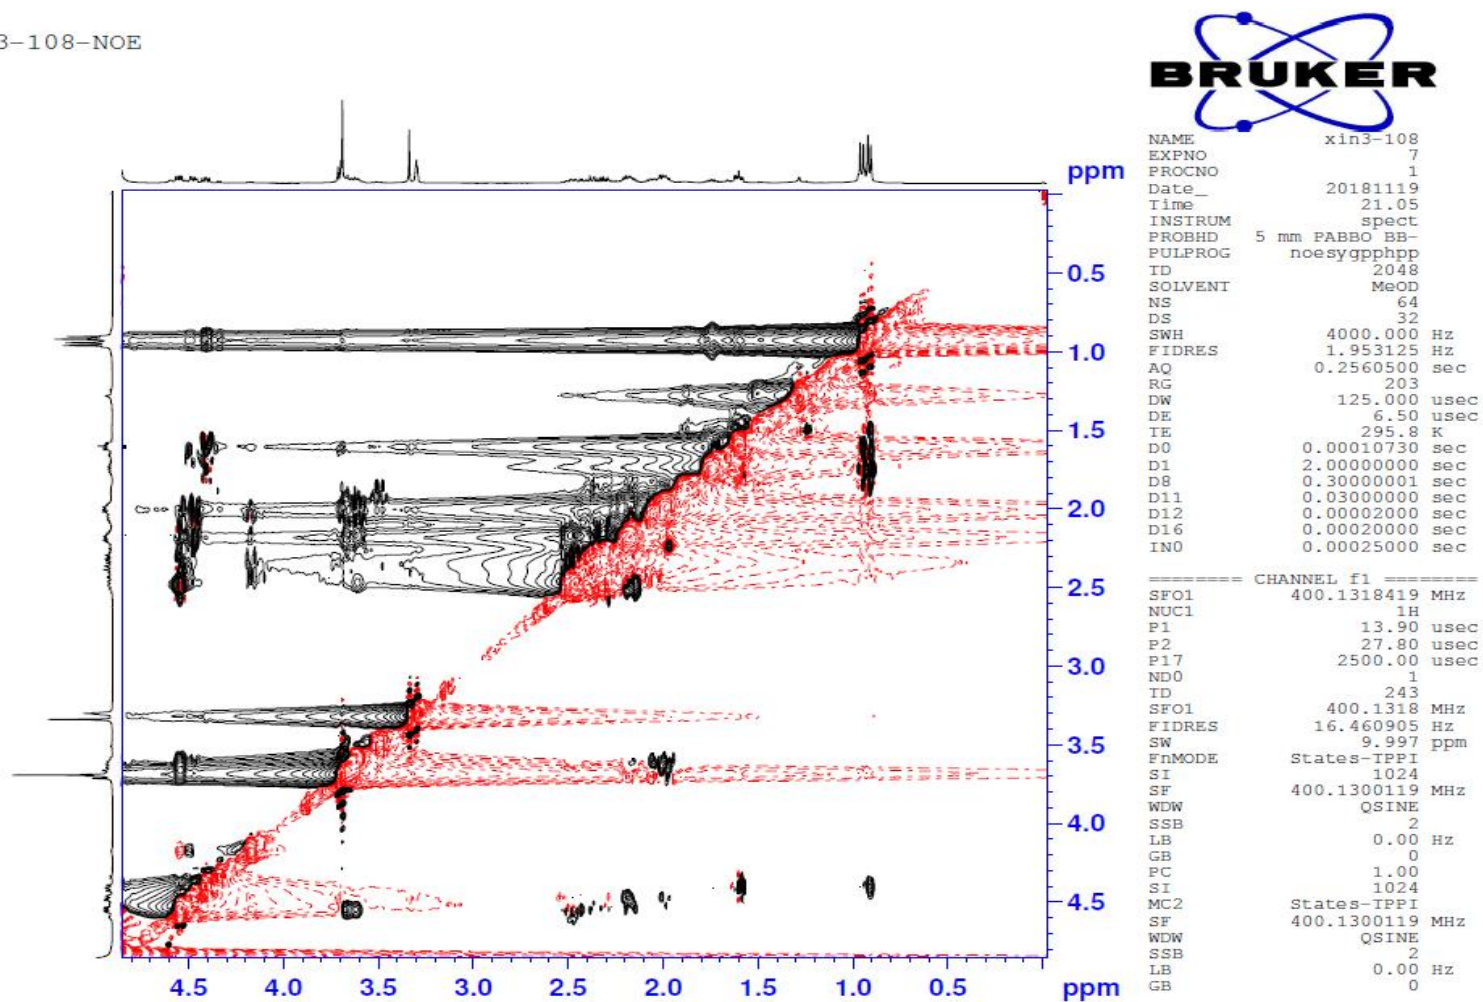Figure S18. NOESY NMR spectrum of **3** in CD<sub>3</sub>OD.

xin3-101-H

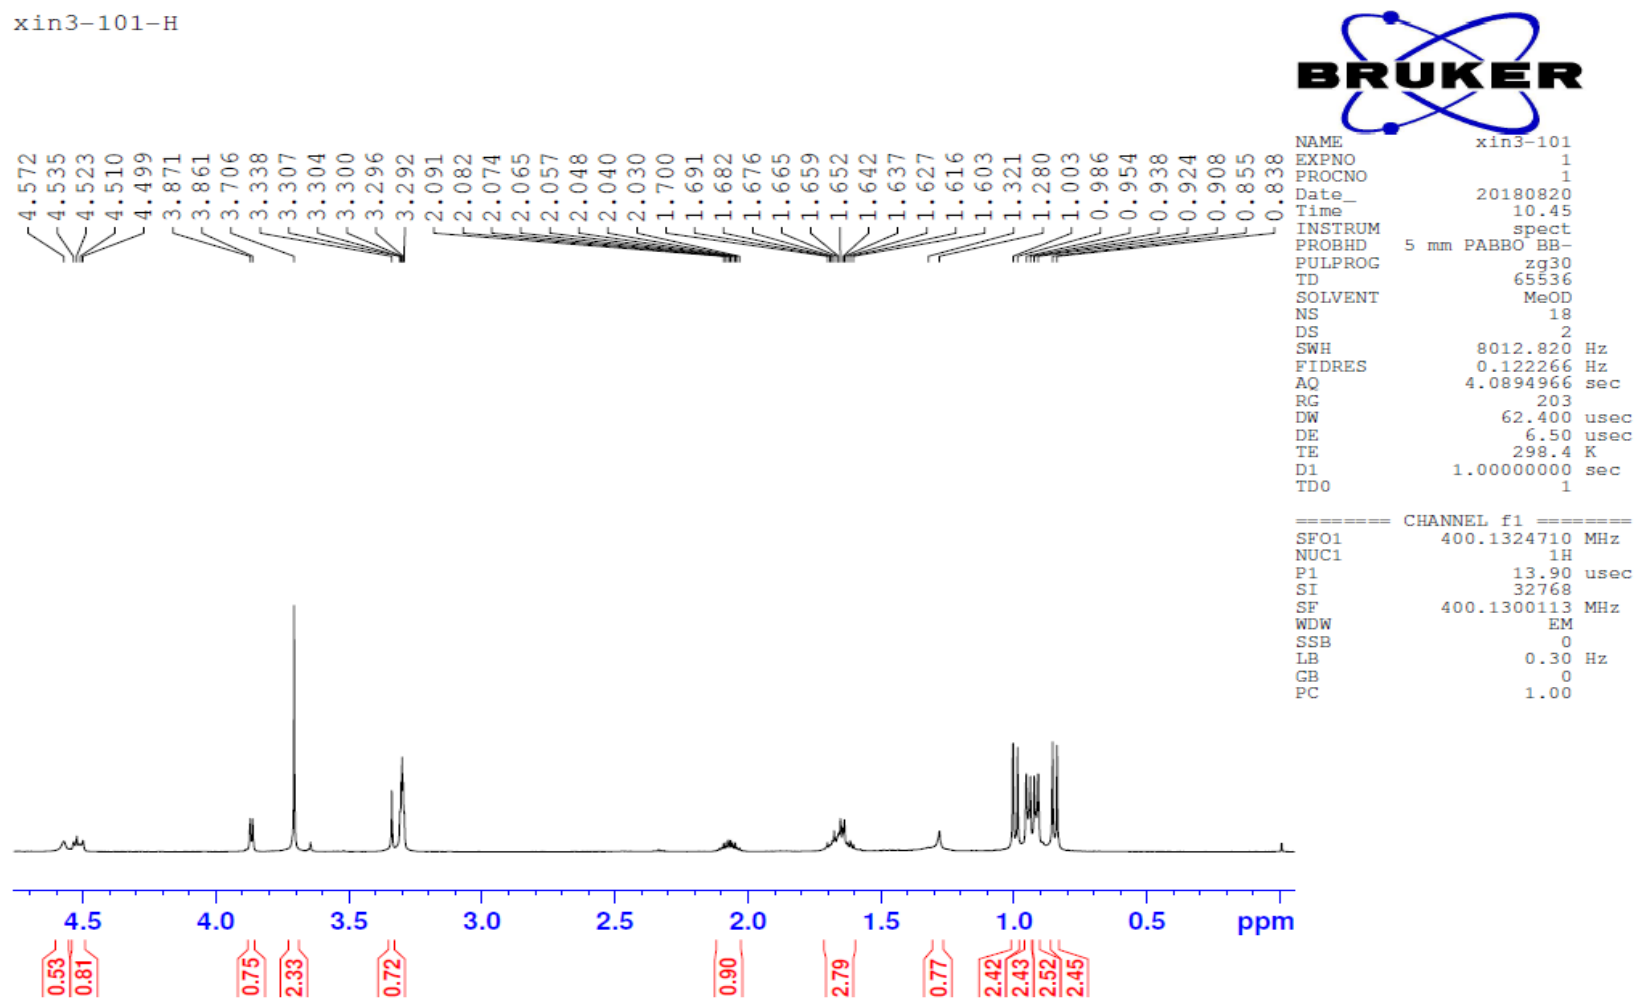Figure S19.  $^1\text{H}$  NMR spectrum of **4** in  $\text{CD}_3\text{OD}$ .

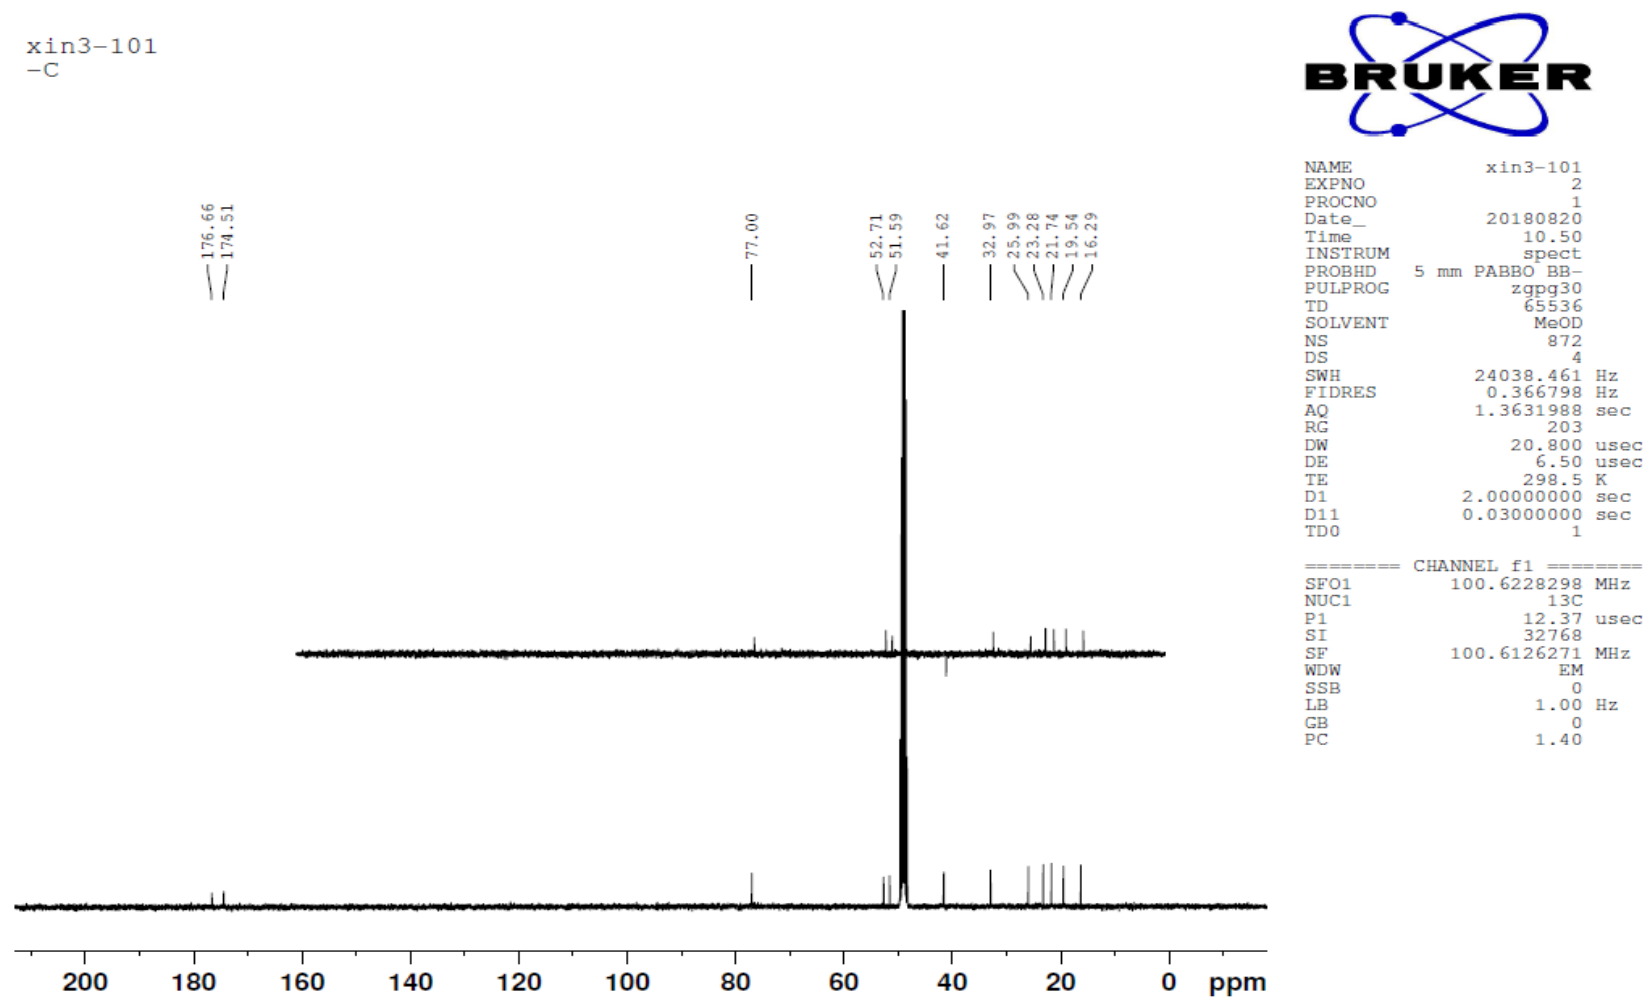

**Figure S20.**  $^{13}\text{C}$  NMR spectrum of **4** in  $\text{CD}_3\text{OD}$ .

xin3-101-HSQCETGP

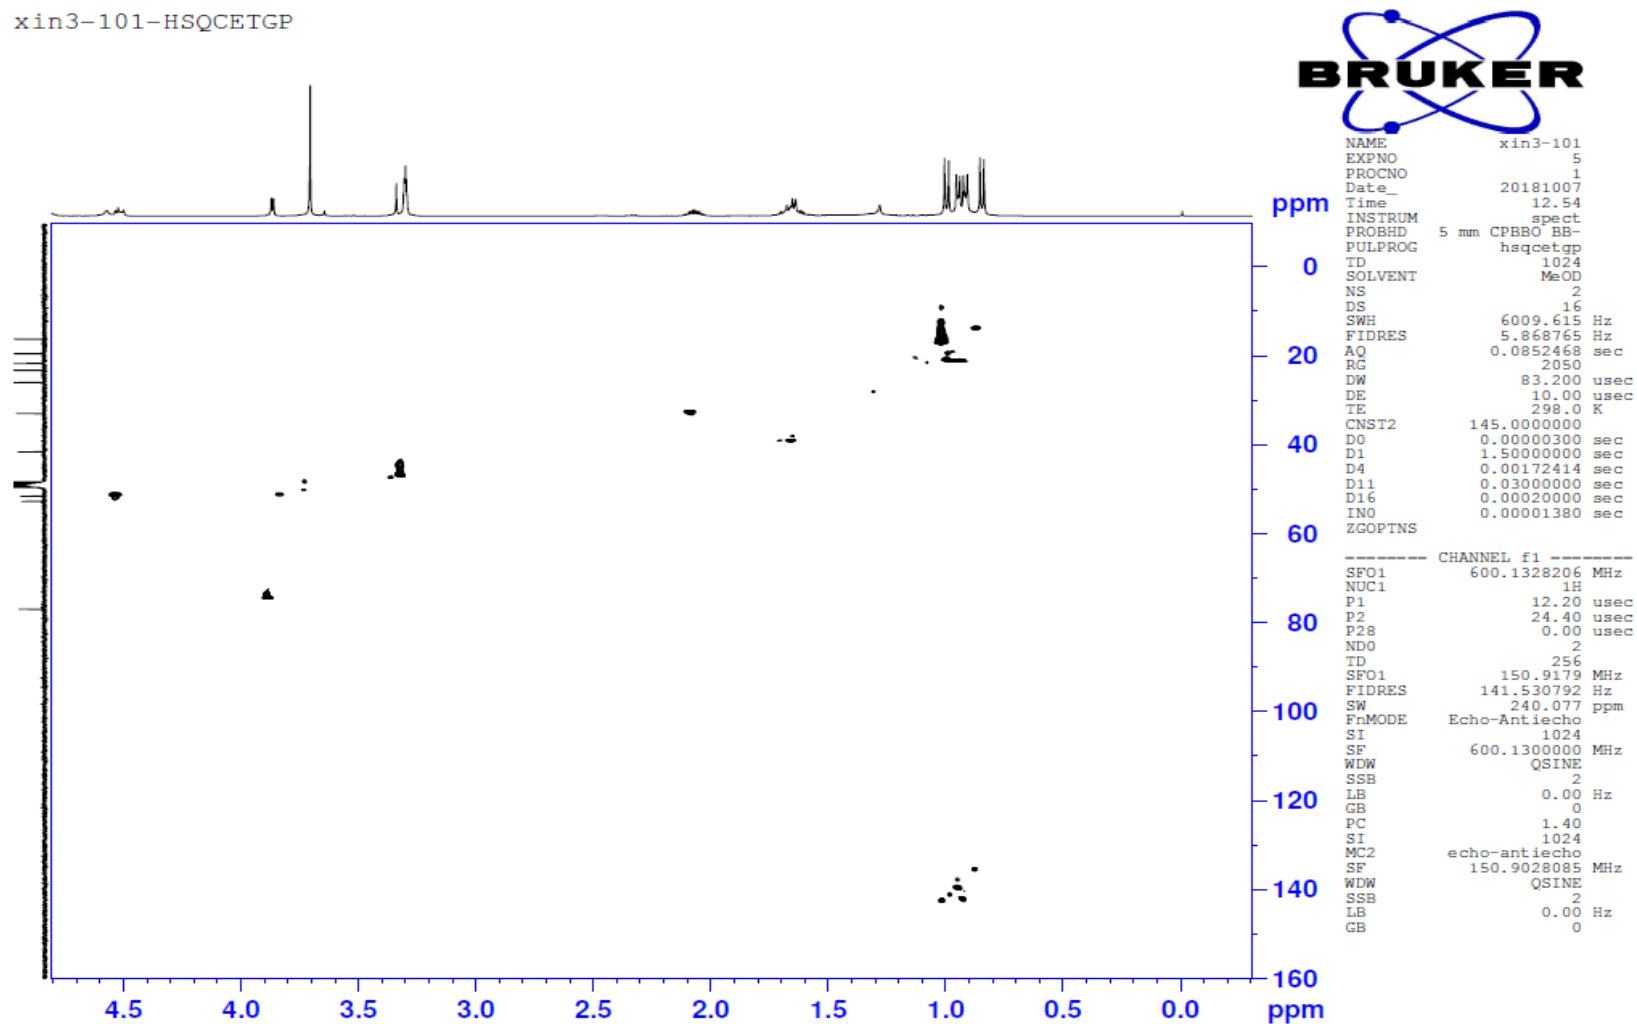Figure S21. HSQC NMR spectrum of **4** in CD<sub>3</sub>OD.

xin3-101-cosy

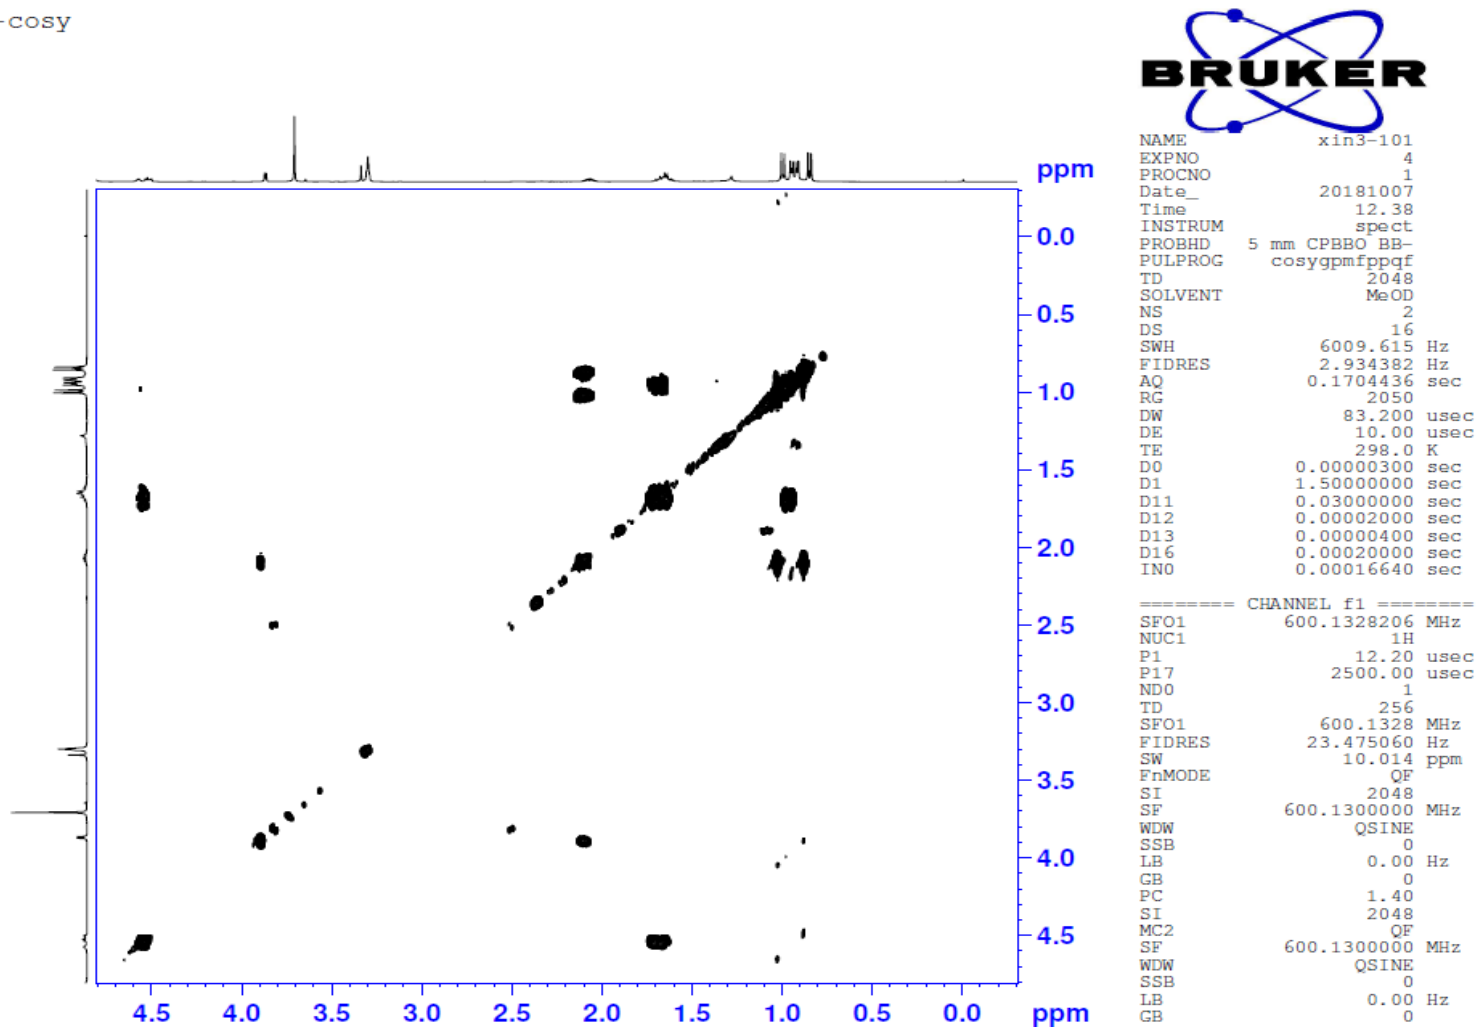Figure S22. COSY NMR spectrum of **4** in CD<sub>3</sub>OD.



xin3-101-HMBCGP

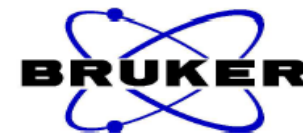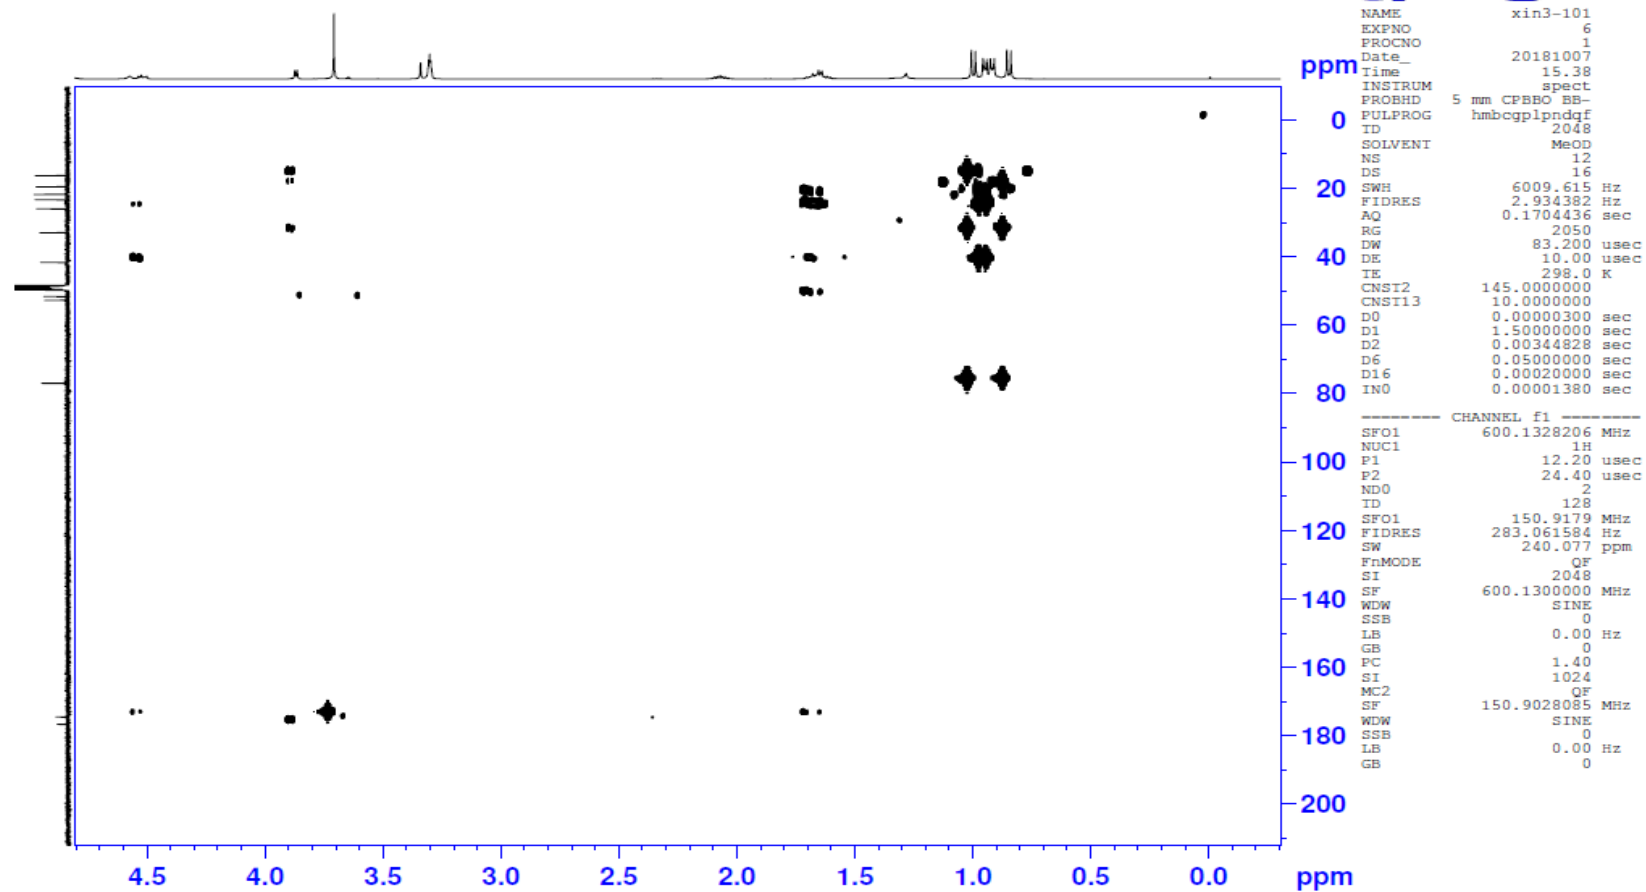Figure S23. HMBC NMR spectrum of **4** in CD<sub>3</sub>OD.

xin3-101-noesy

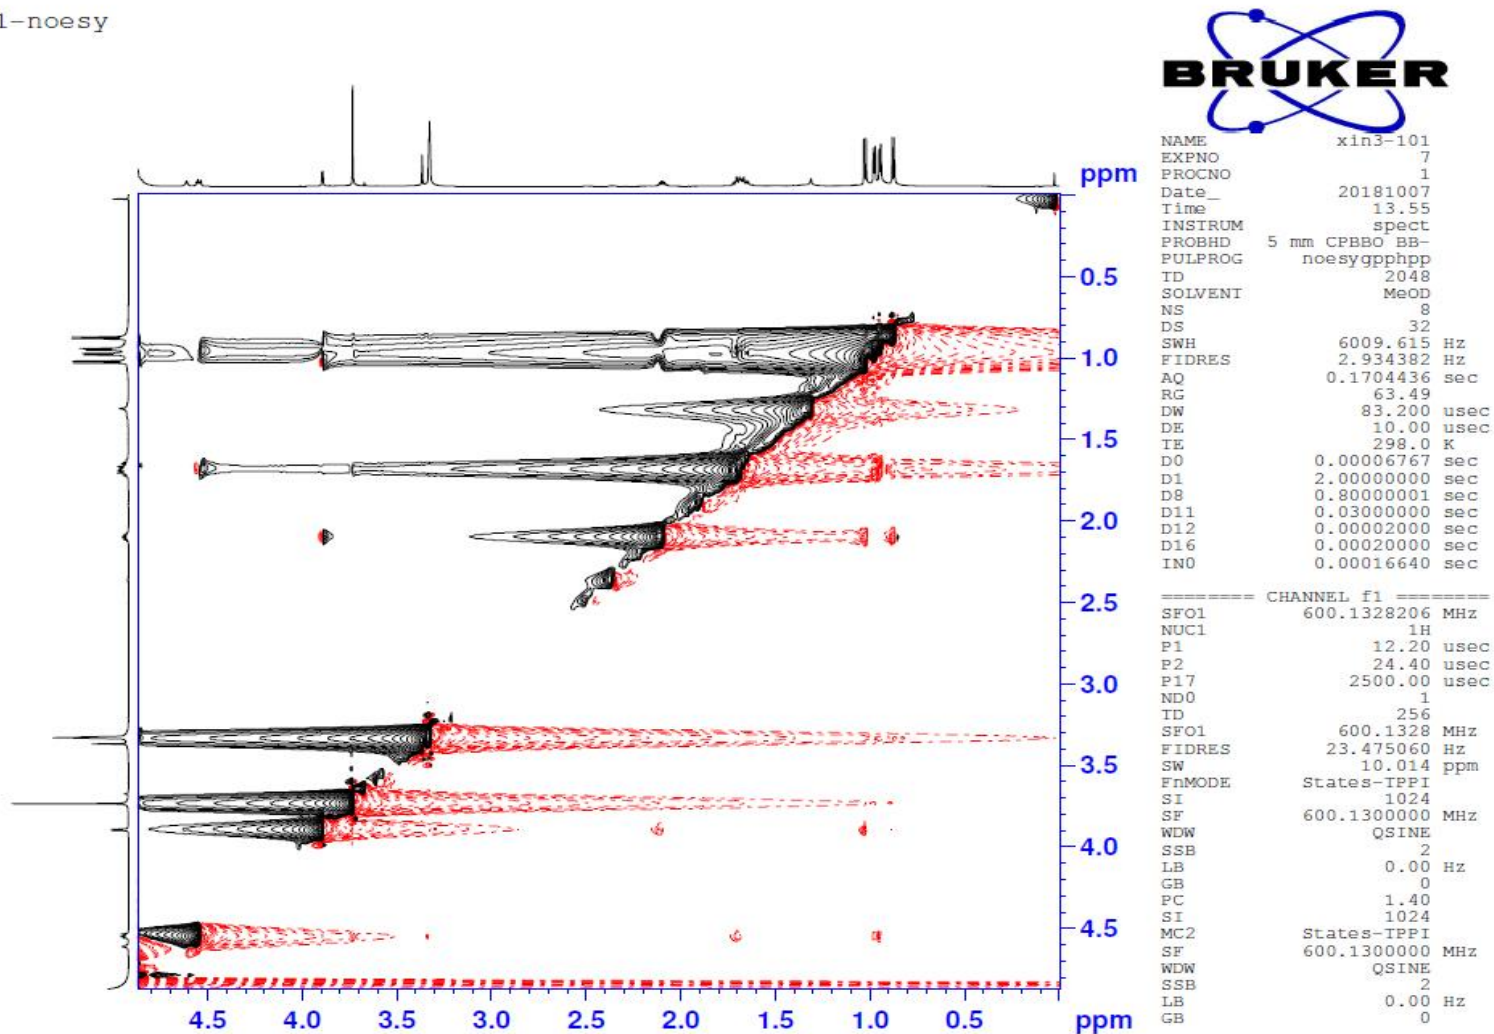Figure S24. NOESY NMR spectrum of **4** in CD<sub>3</sub>OD.

xin3-87-1-H

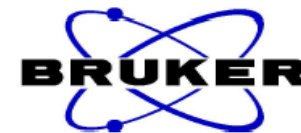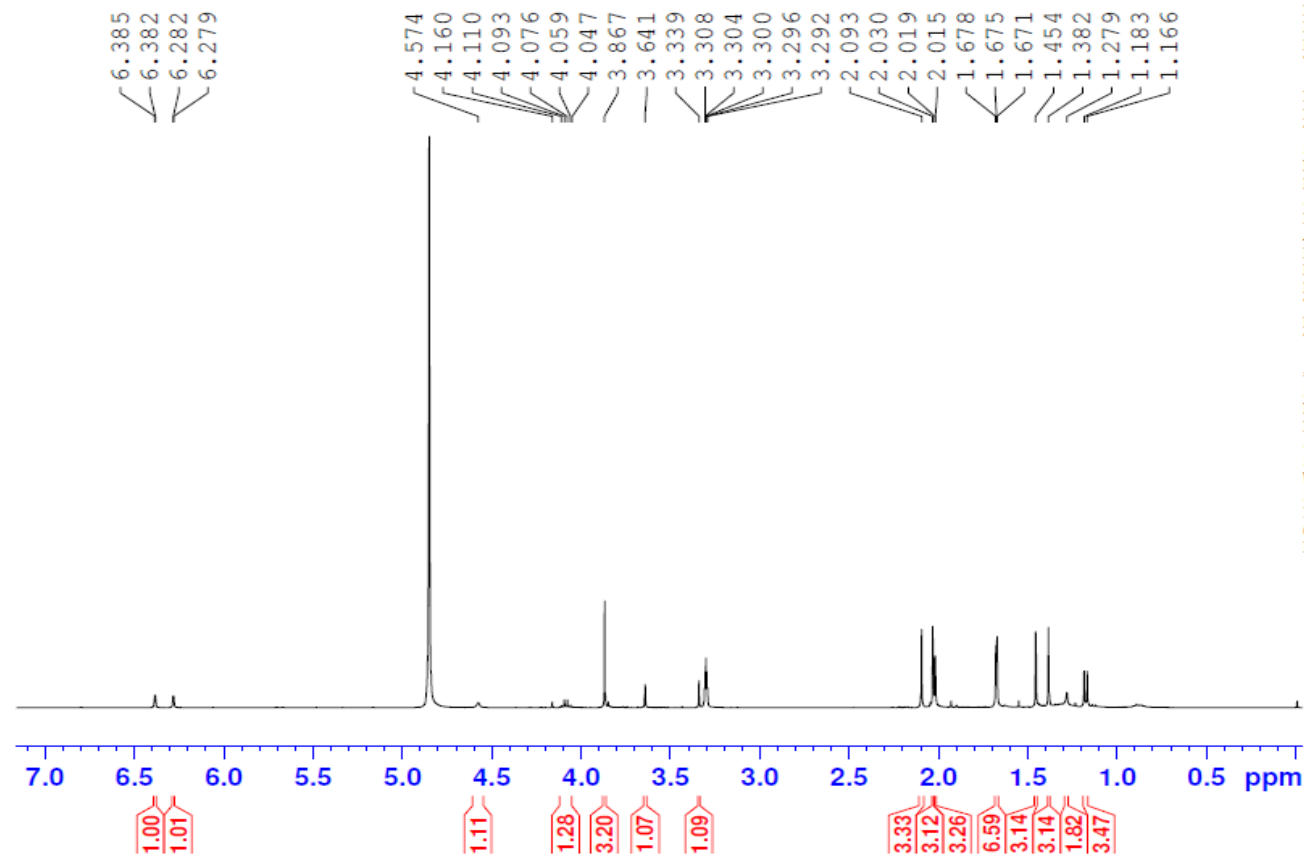

```

NAME          xin3-87-1
EXPNO         19
PROCNO        1
Date_         20180810
Time          8.55
INSTRUM       spect
PROBHD        5 mm PABBO BB-
PULPROG       zg30
TD            65536
SOLVENT       MeOD
NS            20
DS            2
SWH           8012.820 Hz
FIDRES        0.122266 Hz
AQ            4.0894966 sec
RG            203
DW            62.400 usec
DE            6.50 usec
TE            298.2 K
D1            1.00000000 sec
TD0           1

===== CHANNEL f1 =====
SFO1          400.1324710 MHz
NUC1           1H
P1            13.90 usec
SI            32768
SF            400.1300113 MHz
WDW           EM
SSB           0
LB            0.30 Hz
GB            0
PC            1.00

```

Figure S25.  $^1\text{H}$  NMR spectrum of **5** in  $\text{CD}_3\text{OD}$ .

xin3-87-1-C

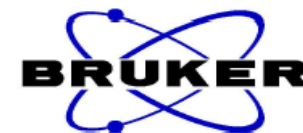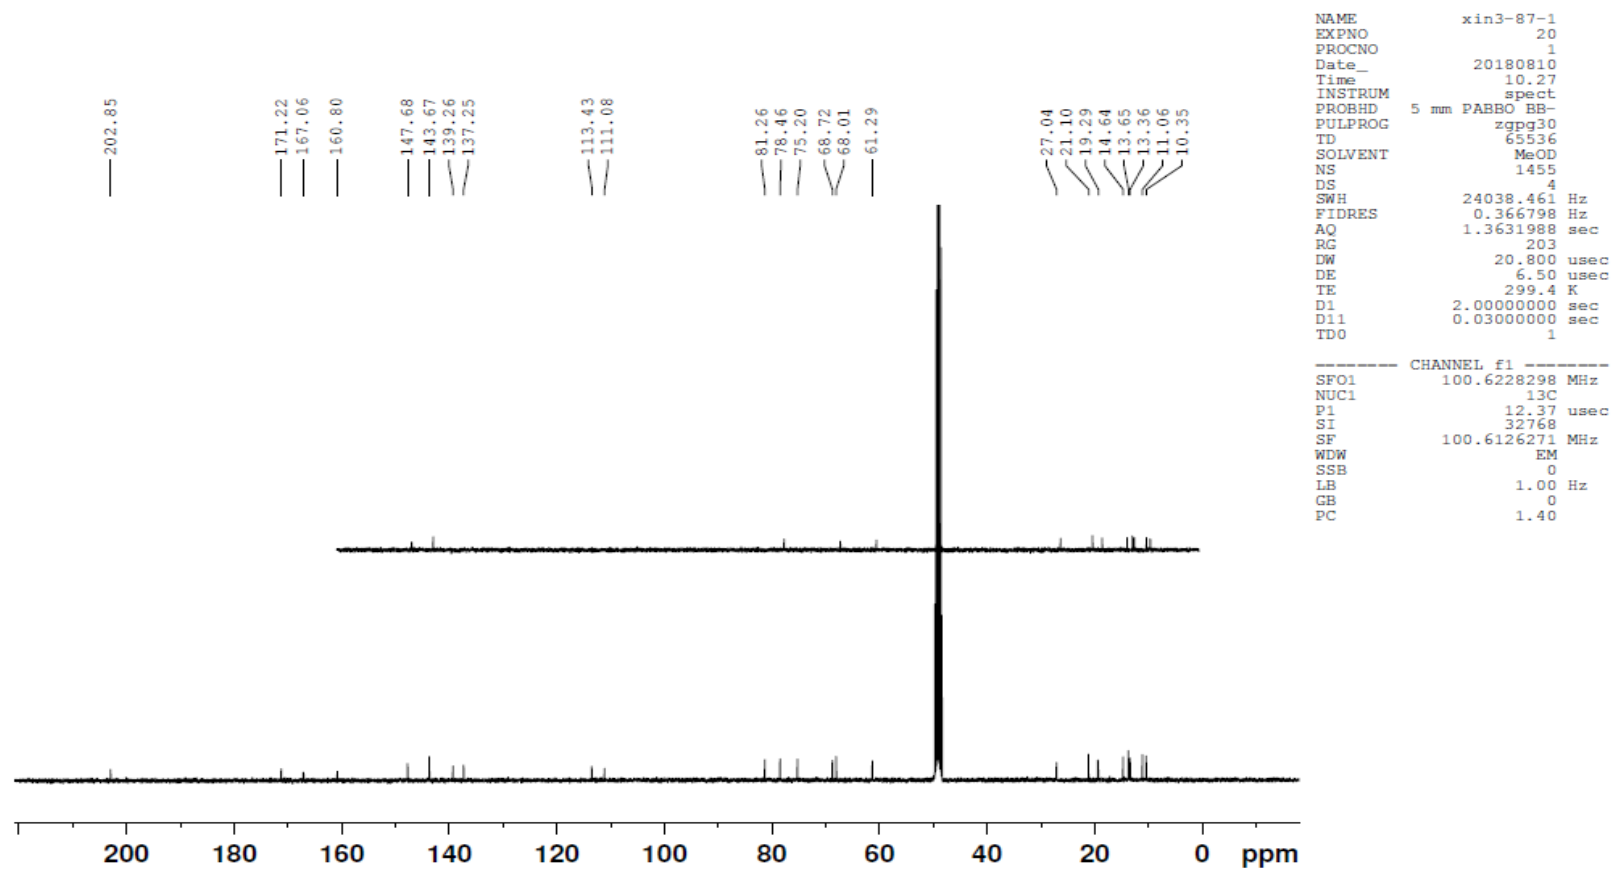Figure S26. <sup>13</sup>C NMR spectrum of **5** in CD<sub>3</sub>OD.

xin3-87-1-HSQCETGP

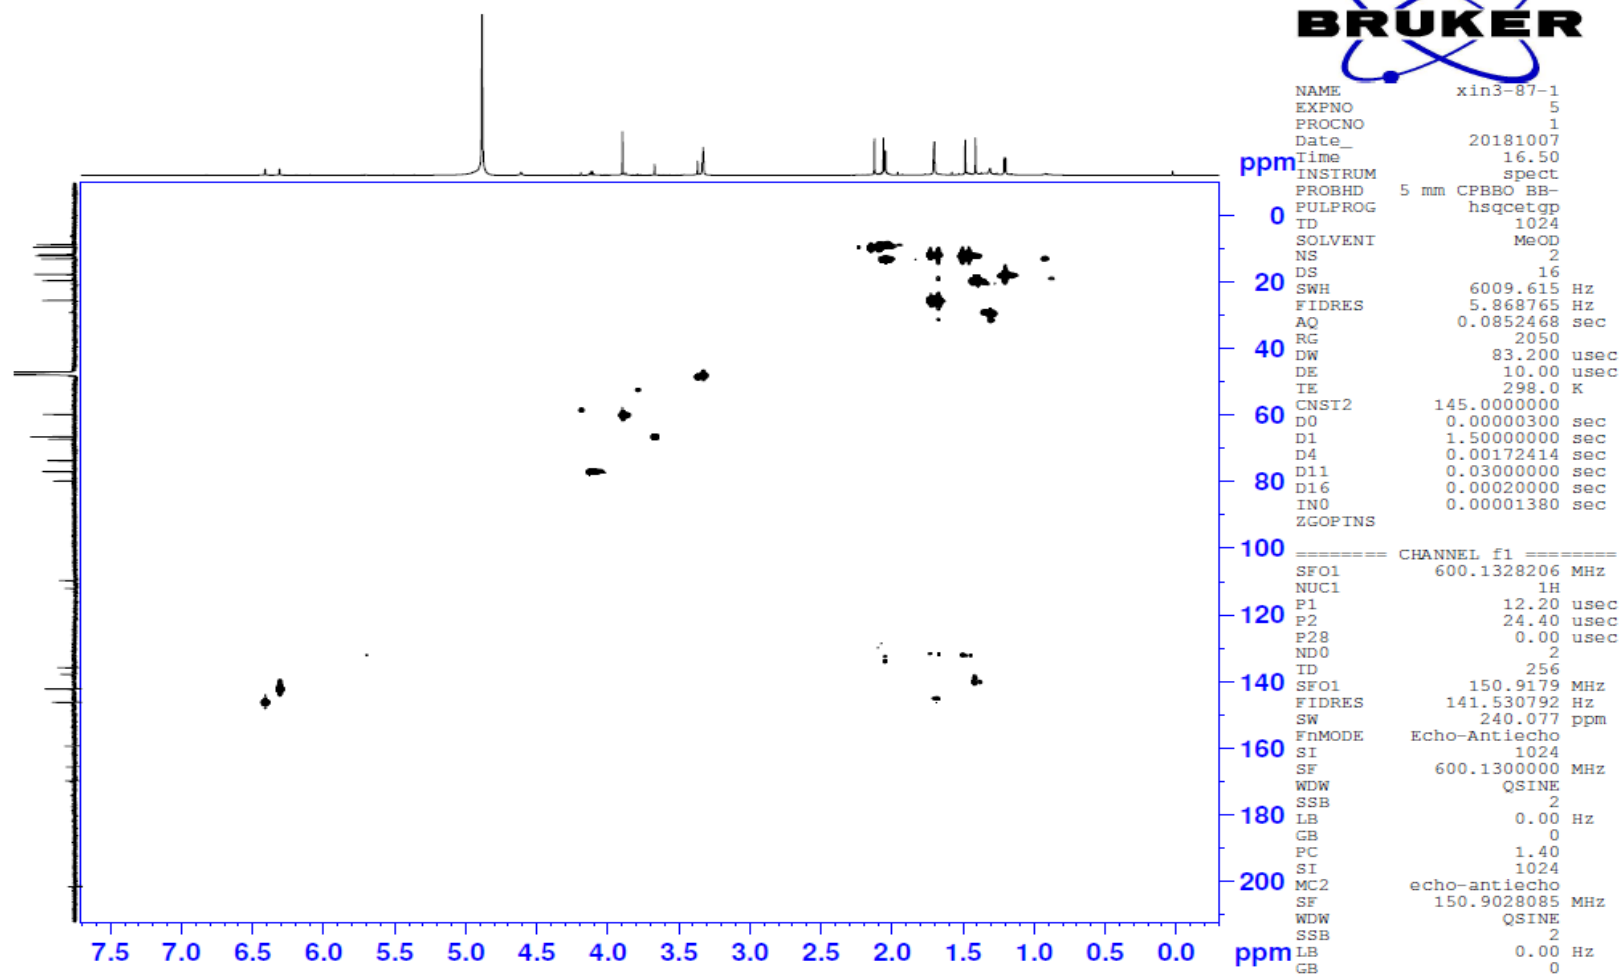Figure S27. HSQC NMR spectrum of **5** in CD<sub>3</sub>OD.

xin3-87-1-cosy

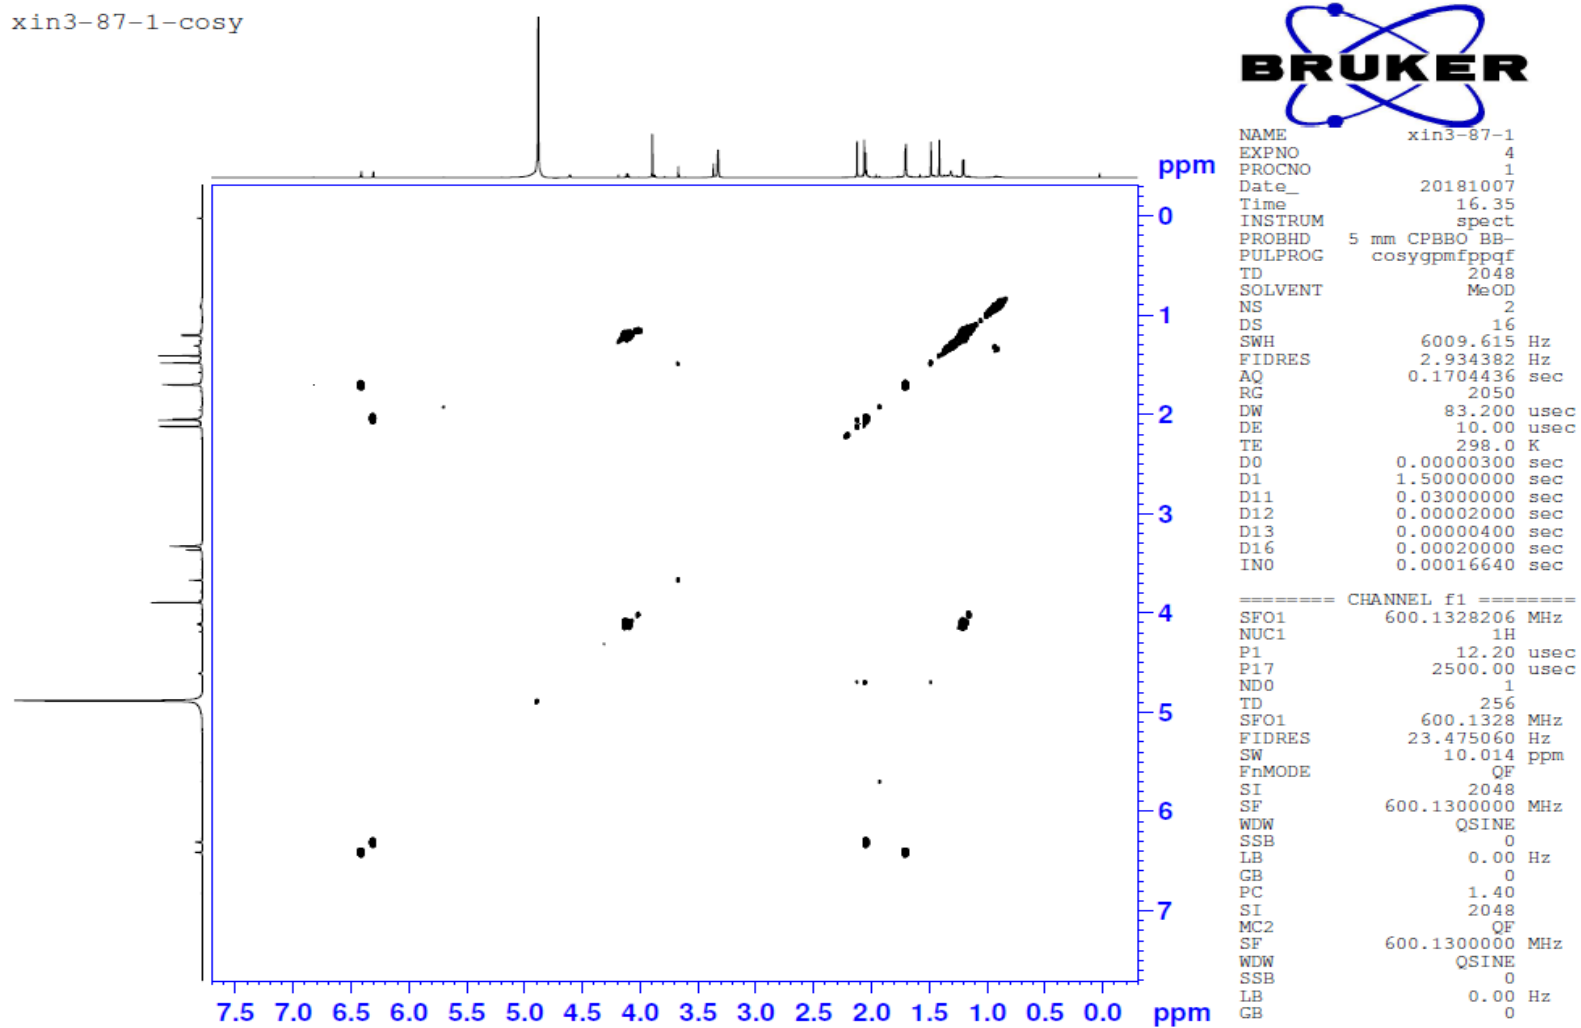Figure S28. COSY NMR spectrum of **5** in CD<sub>3</sub>OD.

xin3-87-1-HMBCGP

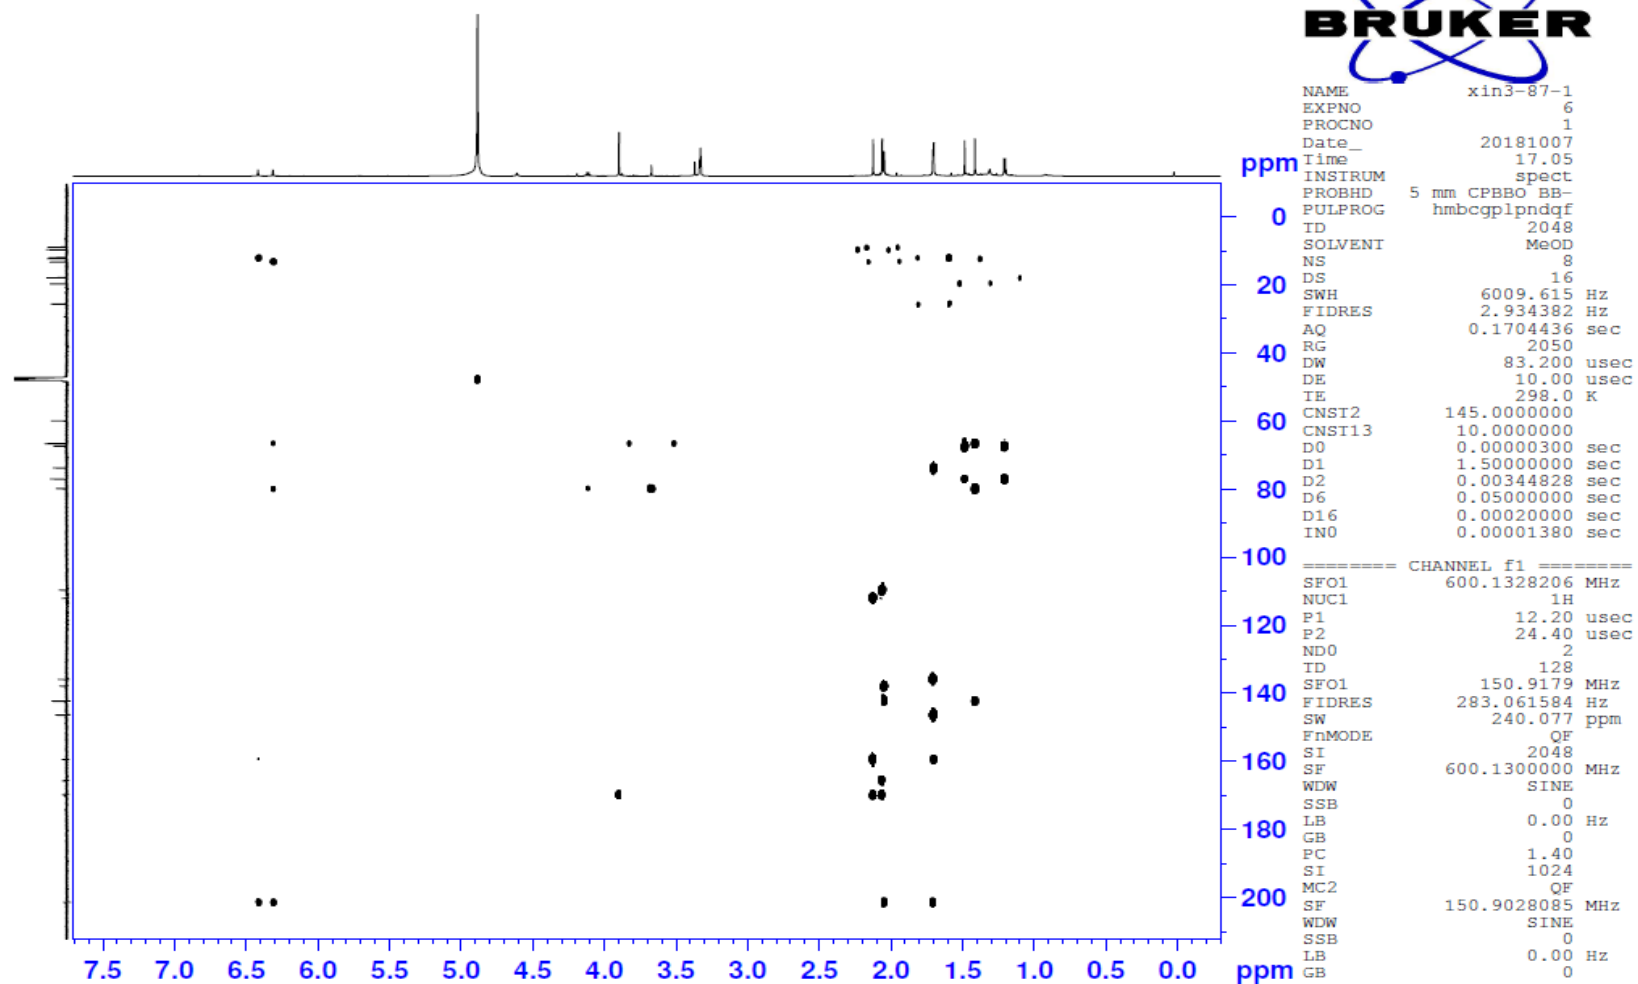Figure S29. HMBC NMR spectrum of **5** in CD<sub>3</sub>OD.

xin3-87-1-noesy

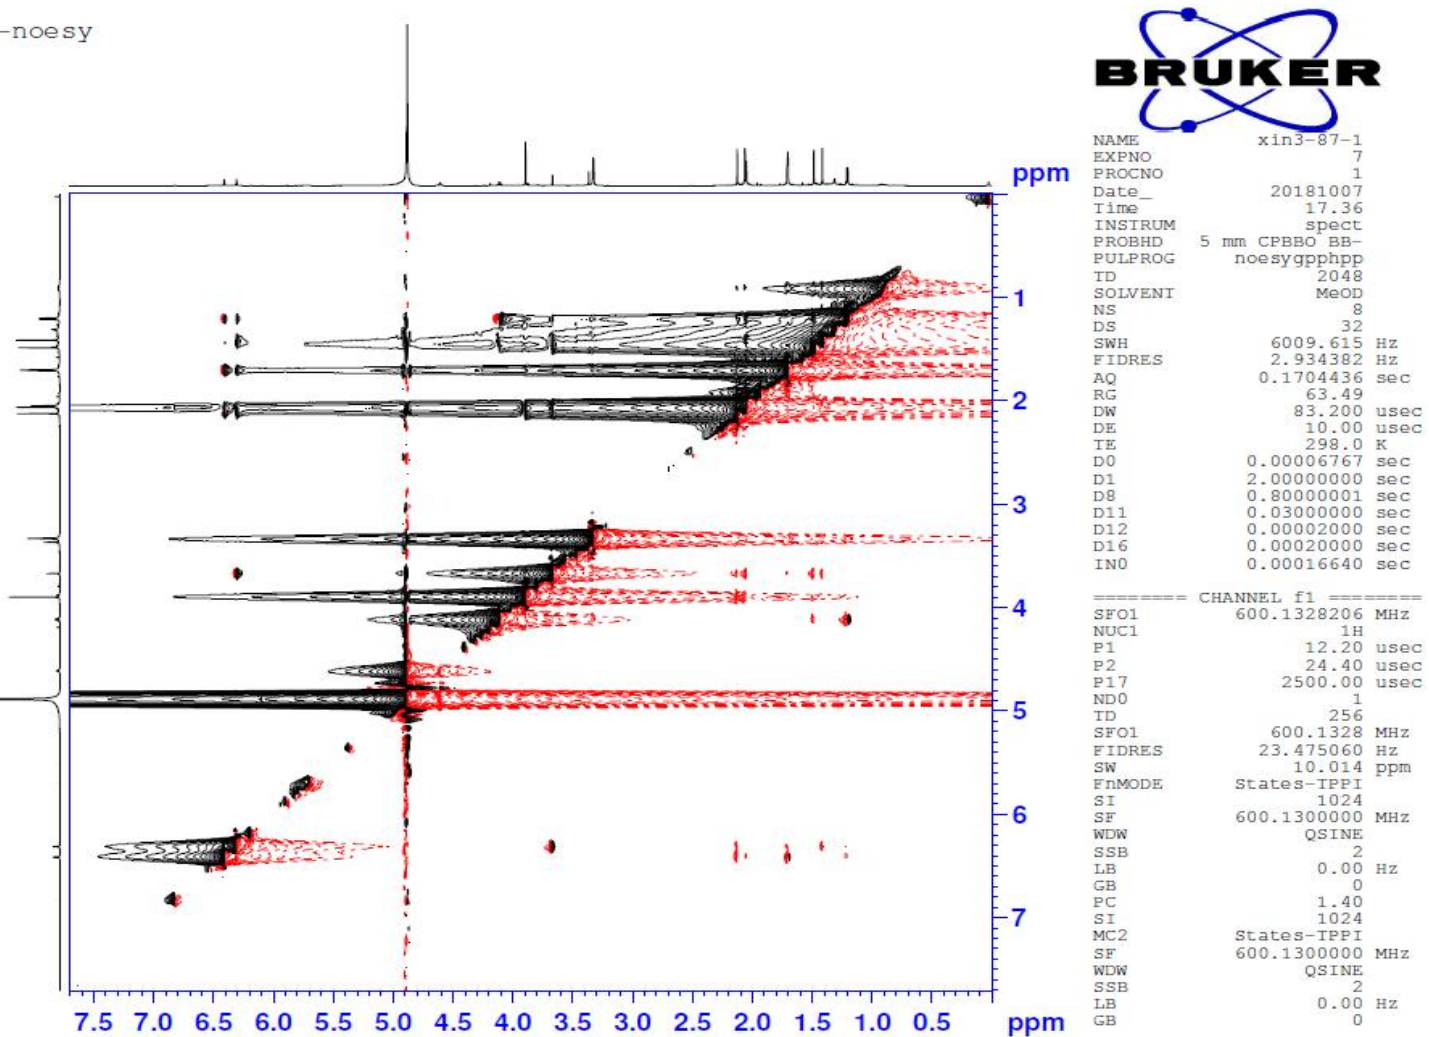Figure S30. NOESY NMR spectrum of **5** in CD<sub>3</sub>OD.



xin3-96-2

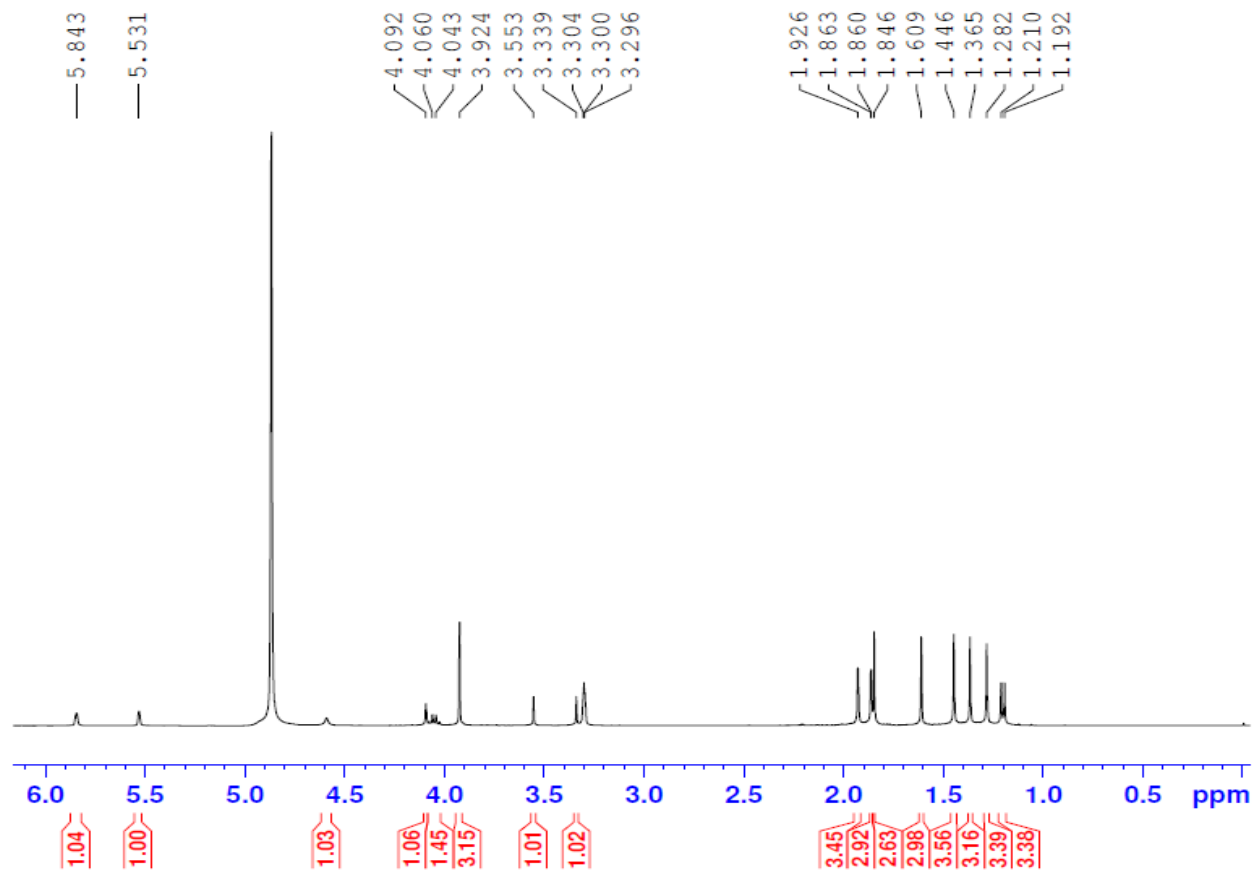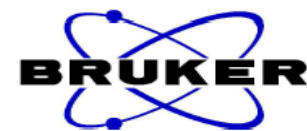

```

NAME      xin3-96-2
EXPNO     111
PROCNO    1
Date_     20181022
Time      22.19
INSTRUM   spect
PROBHD    5 mm PARBO BB-
PULPROG   zg30
TD        65536
SOLVENT   MeOD
NS        21
DS        2
SWH       8012.820 Hz
FIDRES    0.122266 Hz
AQ        4.0894966 sec
RG        161
DW        62.400 usec
DE        6.50 usec
TE        296.3 K
D1        1.00000000 sec
TD0       1

----- CHANNEL f1 -----
SFO1      400.1324710 MHz
NUC1      1H
P1        13.90 usec
SI        32768
SF        400.1300117 MHz
WDW       EM
SSB       0
LB        0.30 Hz
GB        0
PC        1.00

```

**Figure S31.**  $^1\text{H}$  NMR spectrum of **6** in  $\text{CD}_3\text{OD}$ .

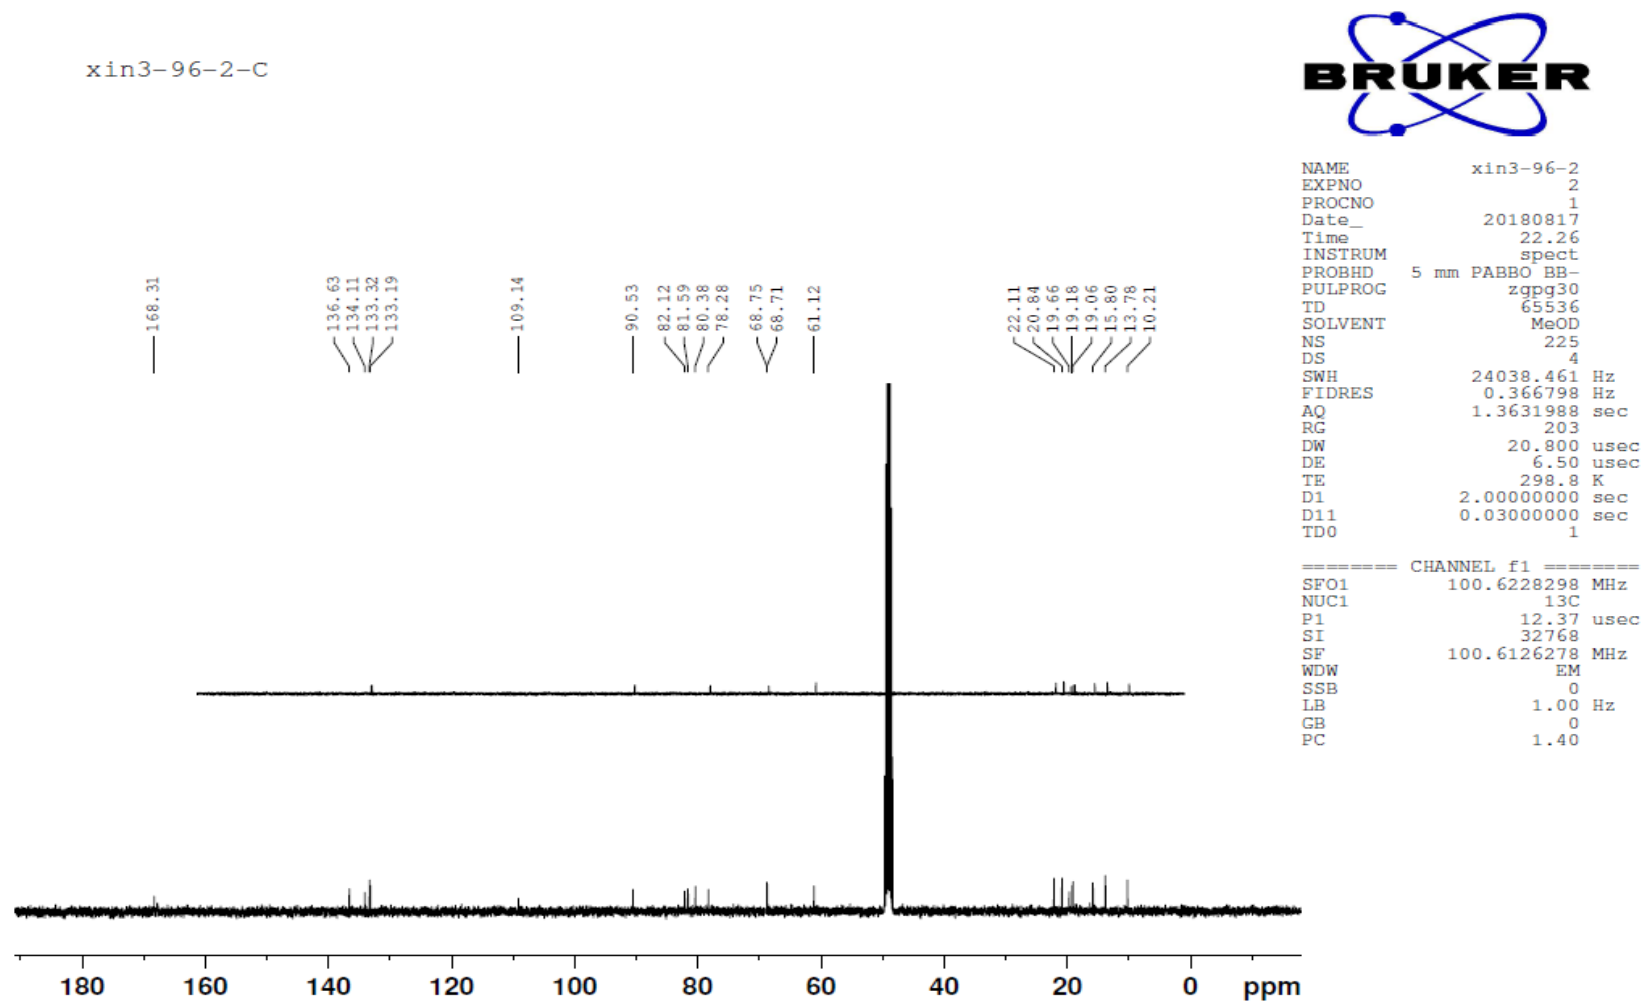

Figure S32.  $^{13}\text{C}$  NMR spectrum of **6** in  $\text{CD}_3\text{OD}$ .

xin3-96-2-QC

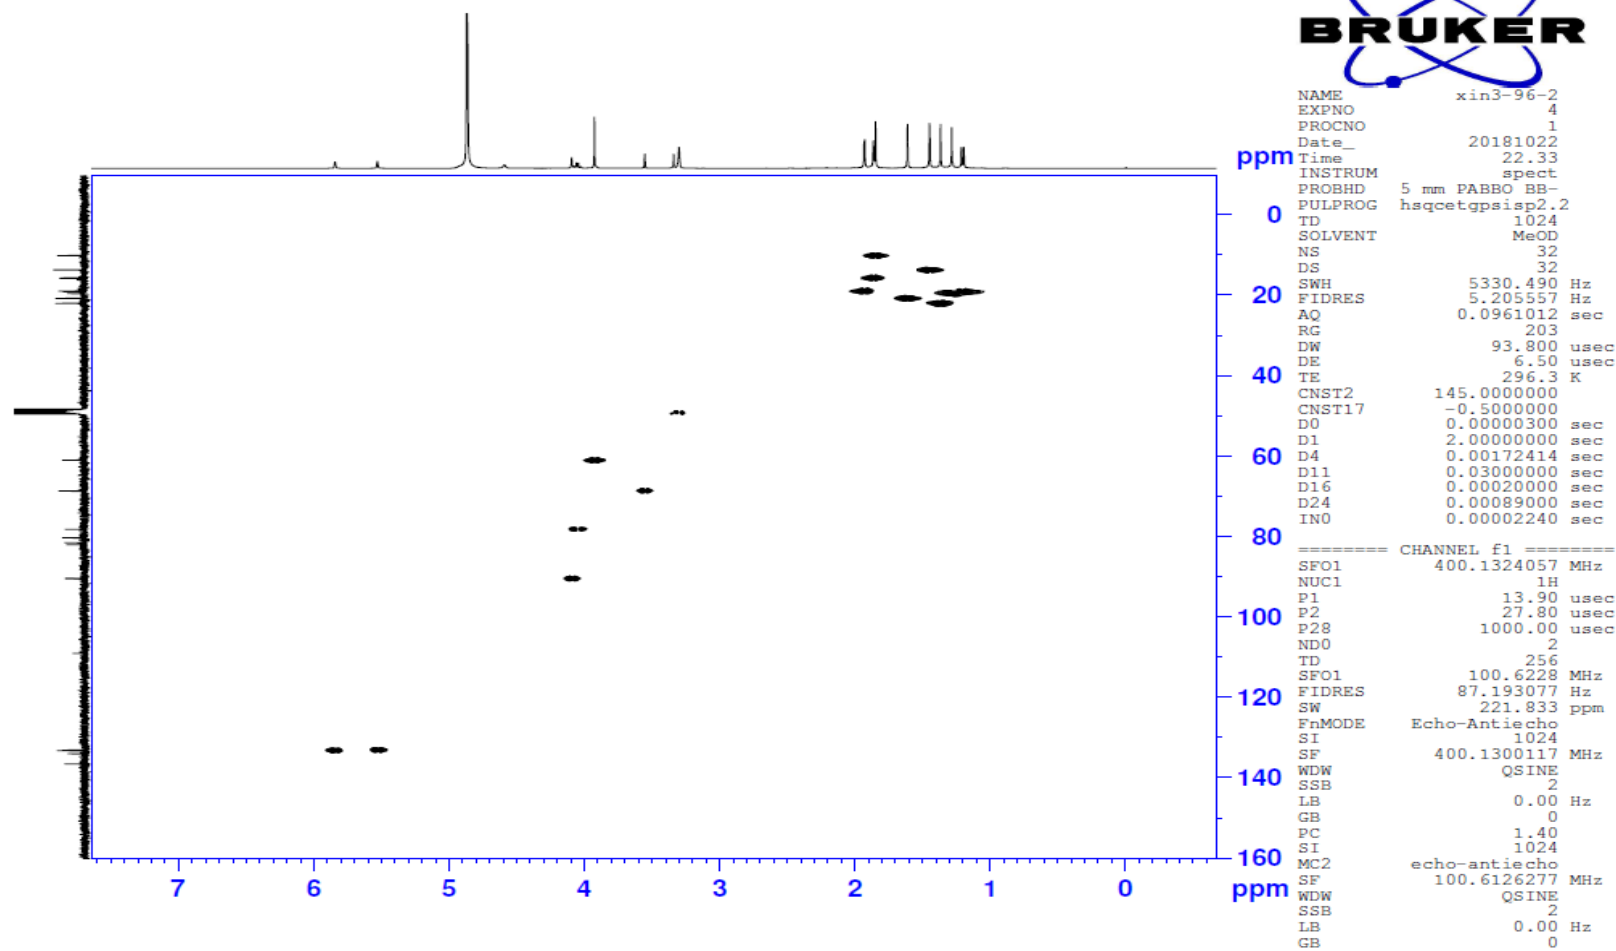Figure S33. HSQC NMR spectrum of **6** in CD<sub>3</sub>OD.

xin3-96-2-COSY

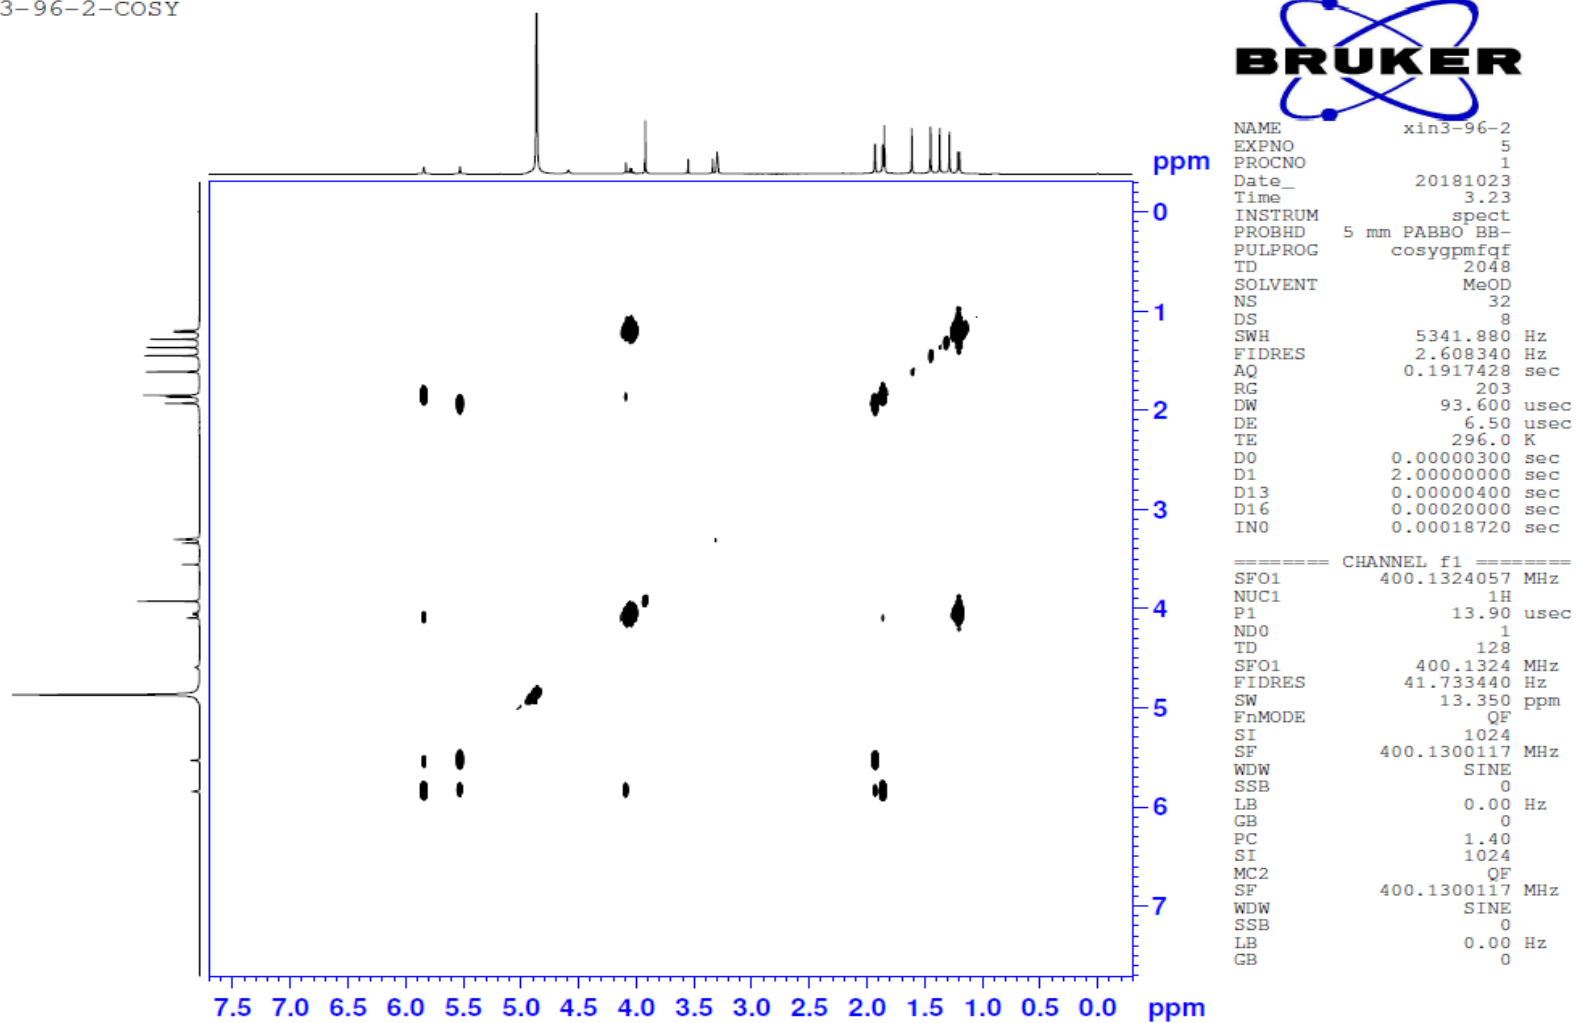Figure S34. COSY NMR spectrum of **6** in CD<sub>3</sub>OD.

xin3-96-2-BC

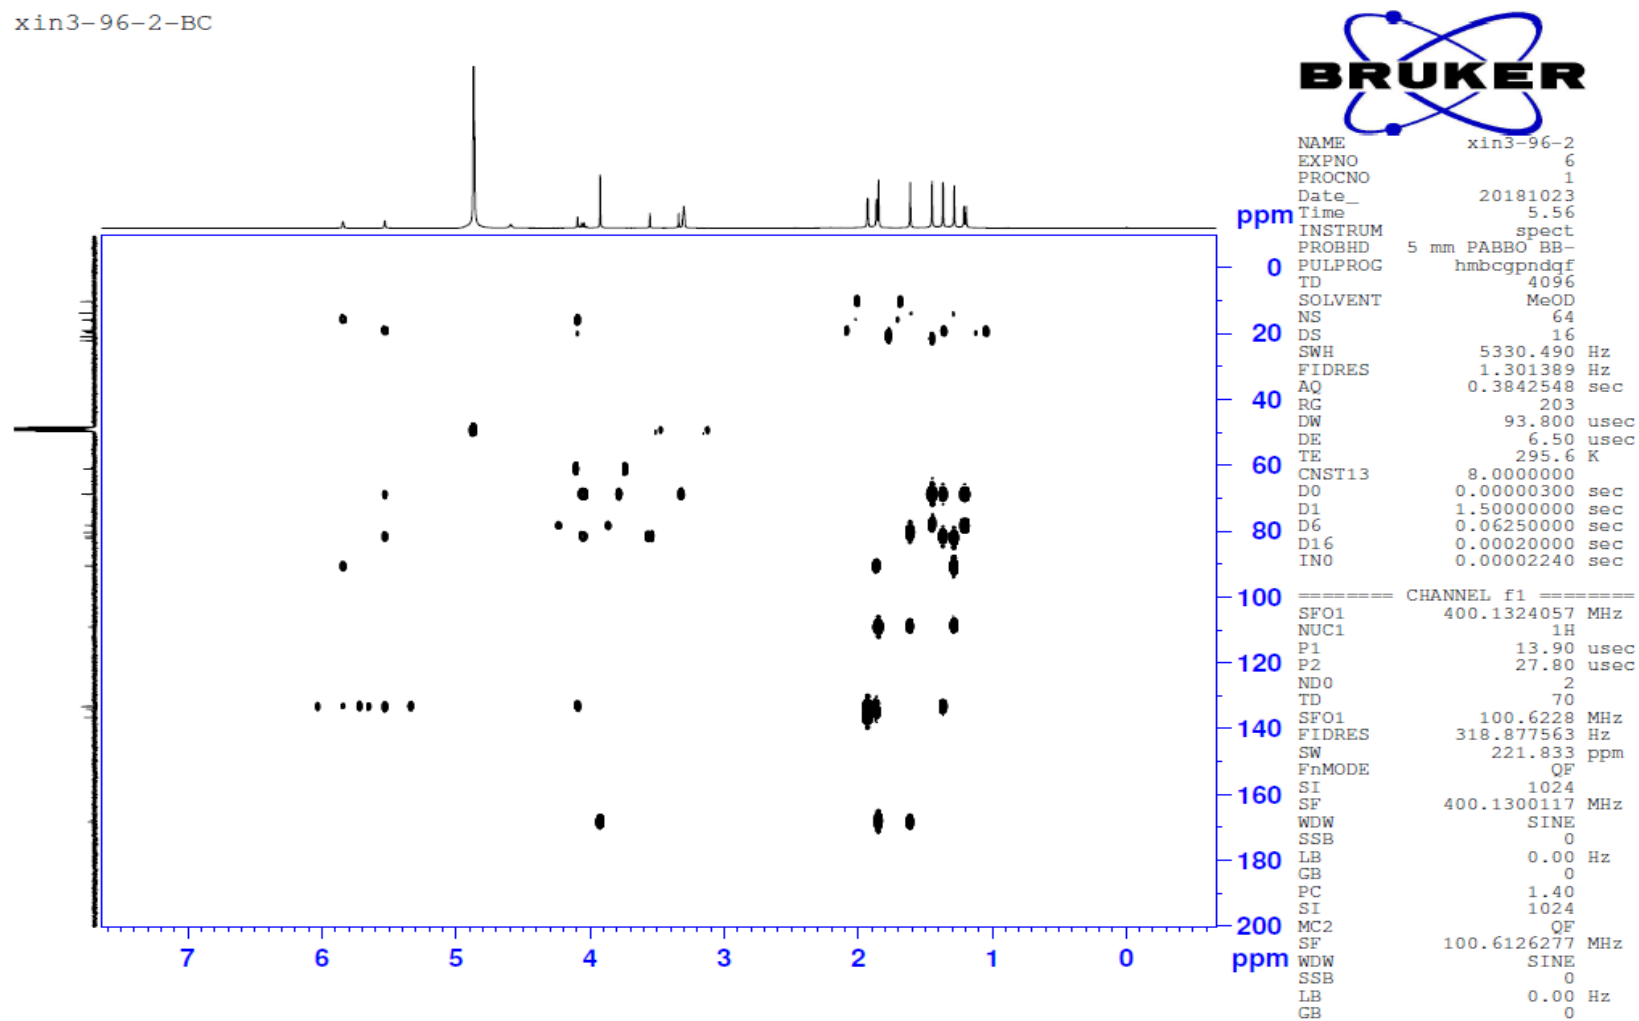Figure S35. HMBC NMR spectrum of **6** in CD<sub>3</sub>OD.

xin3-96-2-NOE

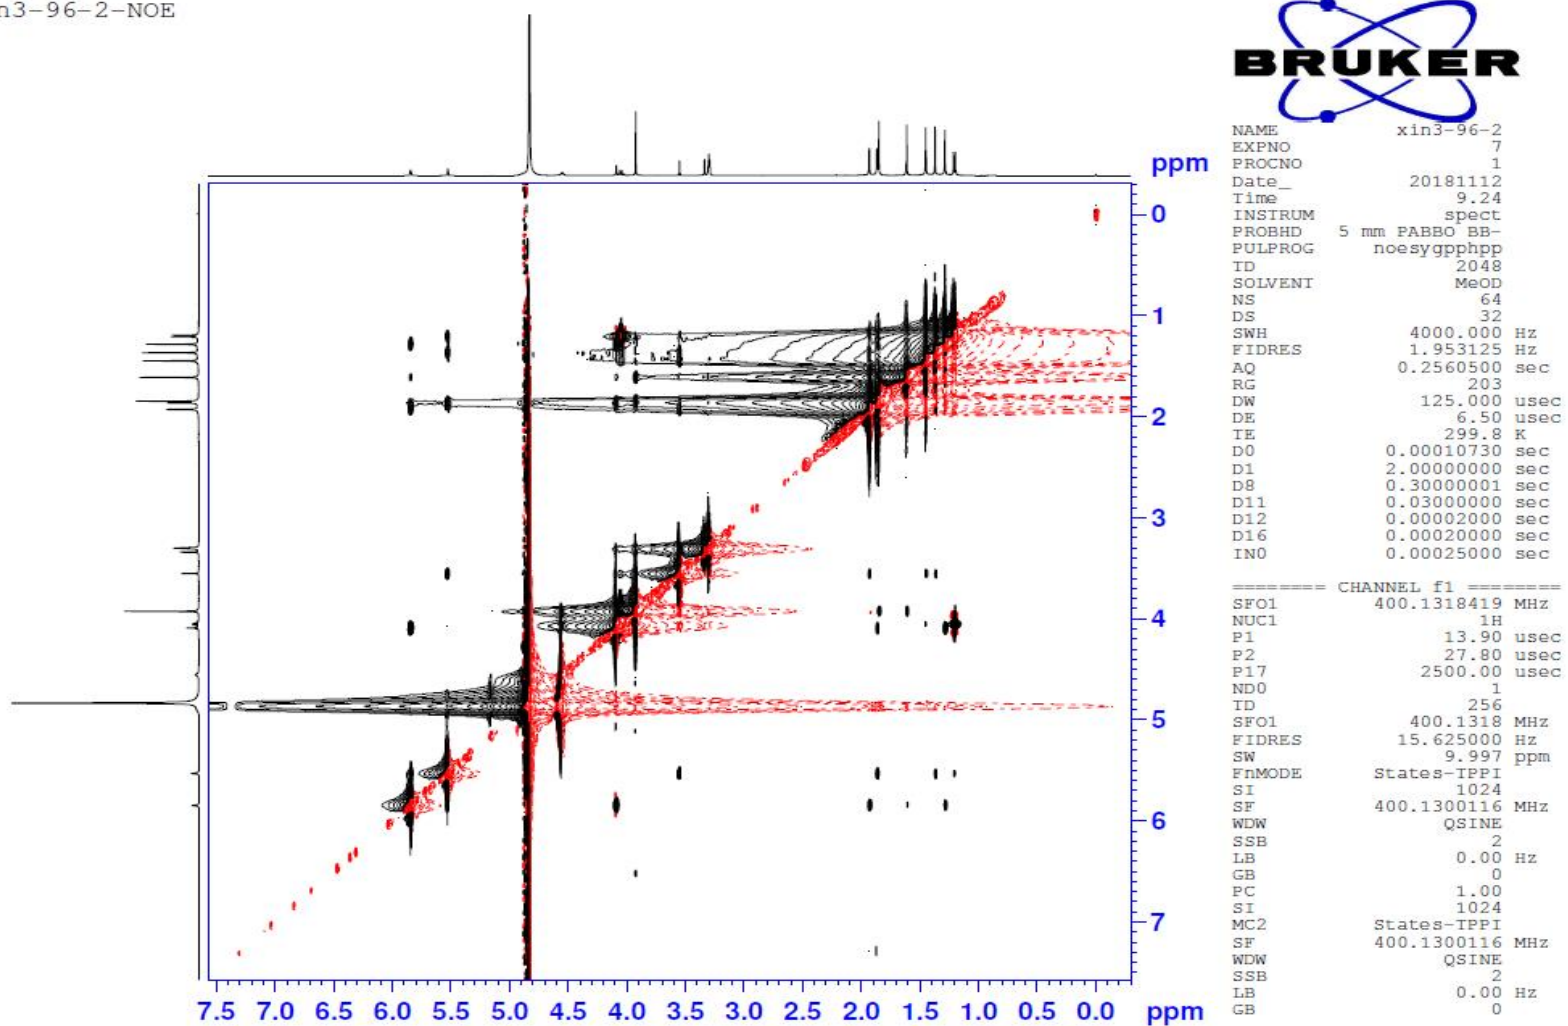Figure S36. NOESY NMR spectrum of **6** in CD<sub>3</sub>OD.

xin3-71 H

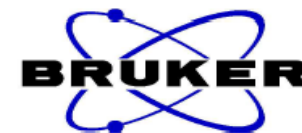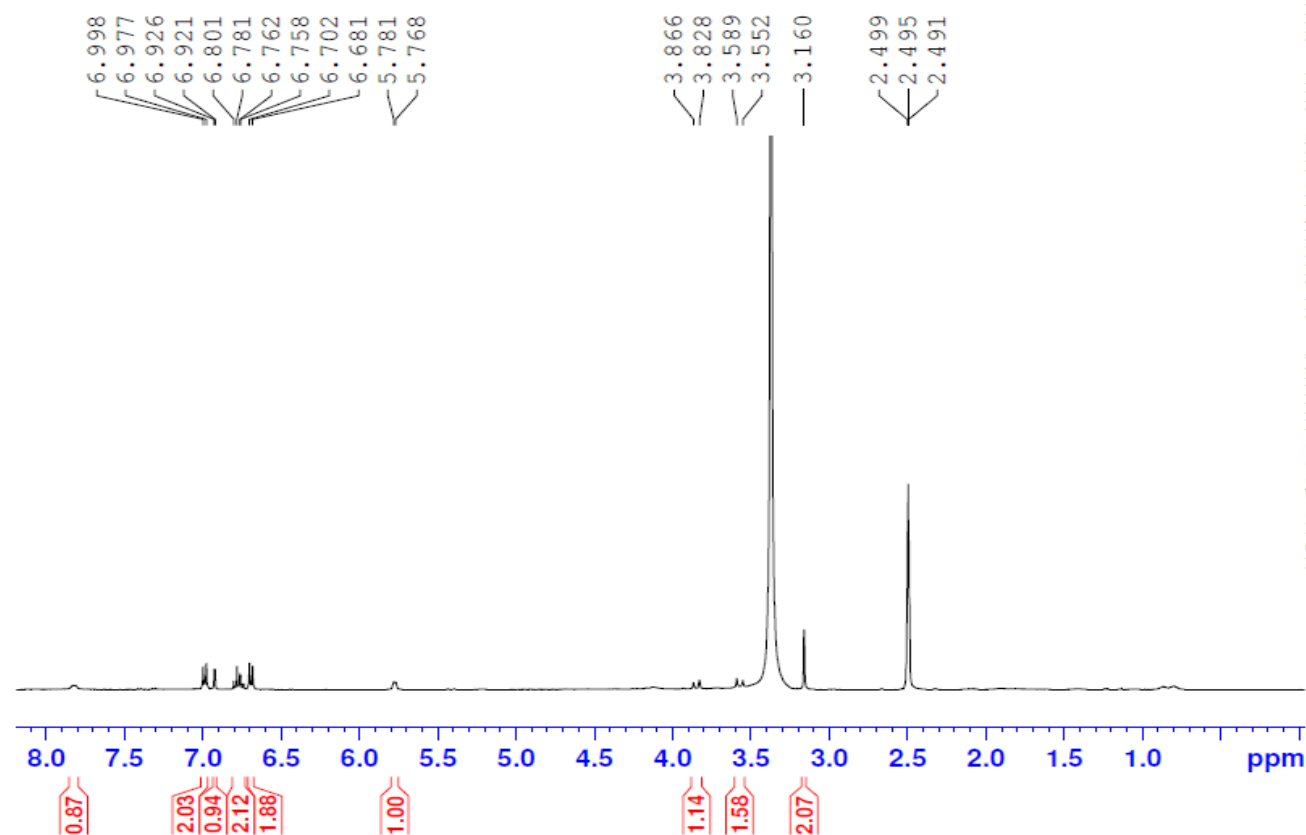

```

NAME          xin3-71
EXPNO         1
PROCNO        1
Date_         20180622
Time_         19.18
INSTRUM       spect
PROBHD        5 mm PABBO BB-
PULPROG       zg30
TD            65536
SOLVENT       DMSO
NS            25
DS            2
SWH           8223.685 Hz
FIDRES        0.125483 Hz
AQ            3.9846387 sec
RG            203
DW            60.800 usec
DE            6.50 usec
TE            296.4 K
D1            1.00000000 sec
TD0           1

===== CHANNEL f1 =====
NUC1          1H
P1            13.09 usec
PL1           -1.00 dB
PL1W          12.14314651 W
SFO1          400.1324710 MHz
SI            32768
SF            400.1299974 MHz
WDW           EM
SSB           0
LB            0.30 Hz
GB            0
PC            1.00

```

Figure S37.  $^1\text{H}$  NMR spectrum of **7** in  $\text{DMSO}-d_6$ .

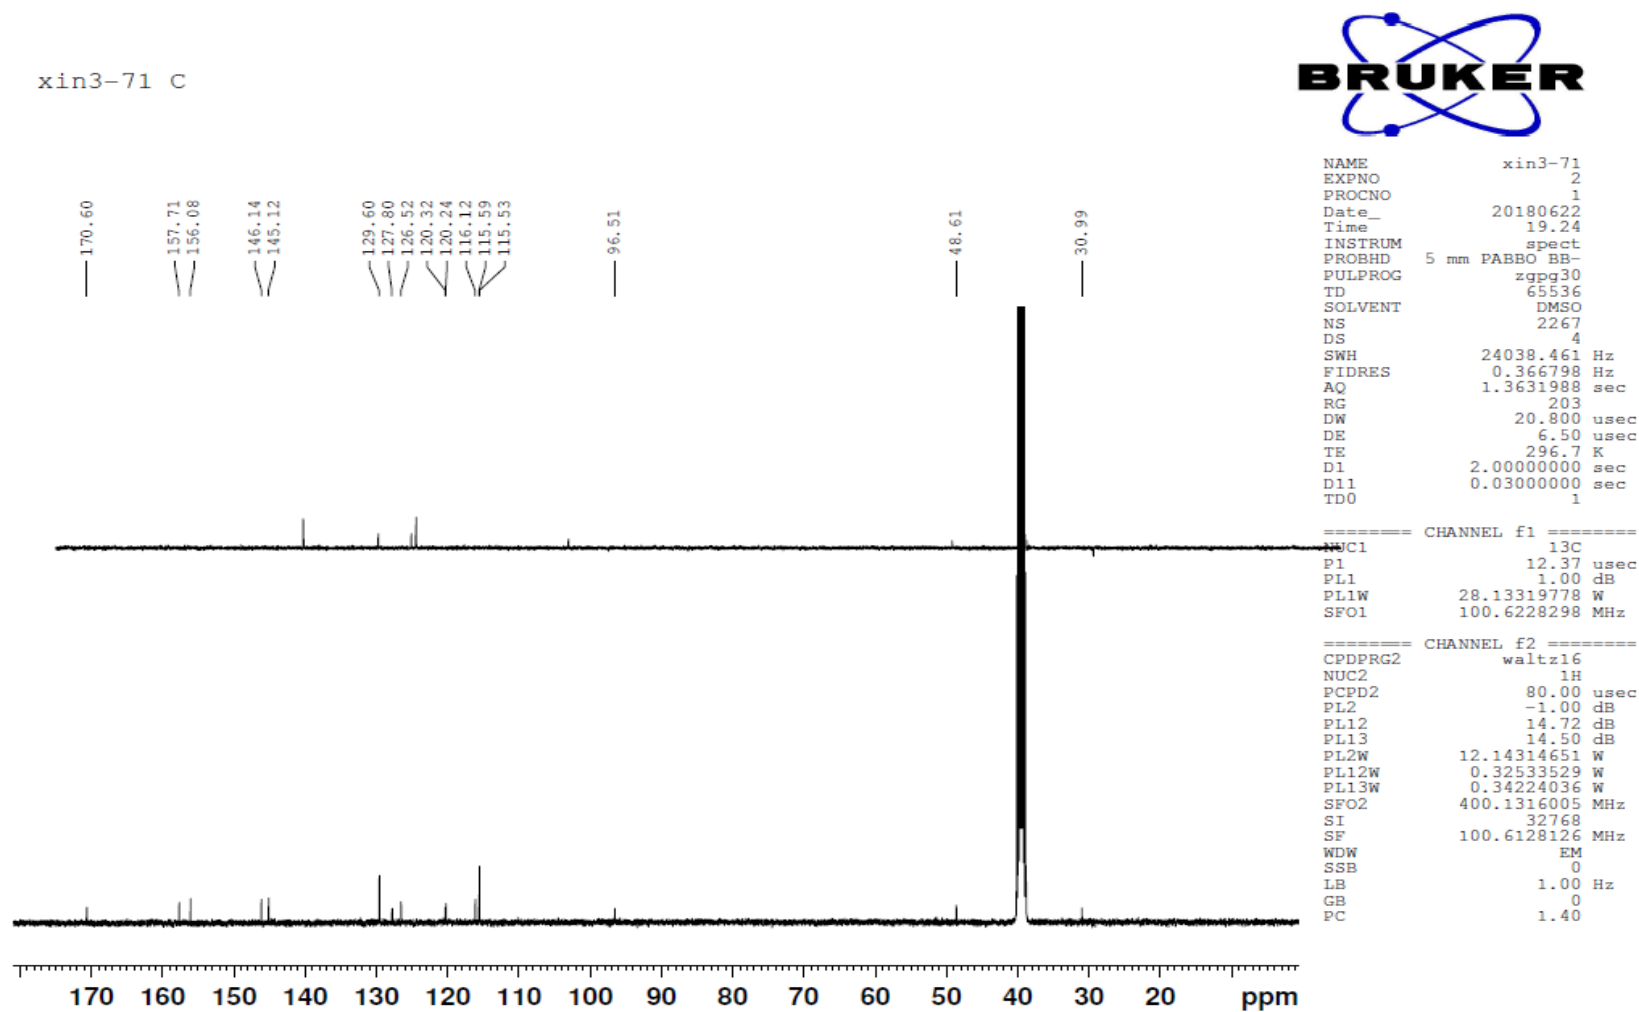Figure S38.  $^{13}\text{C}$  NMR spectrum of **7** in  $\text{DMSO-}d_6$ .



xin3-71-QC

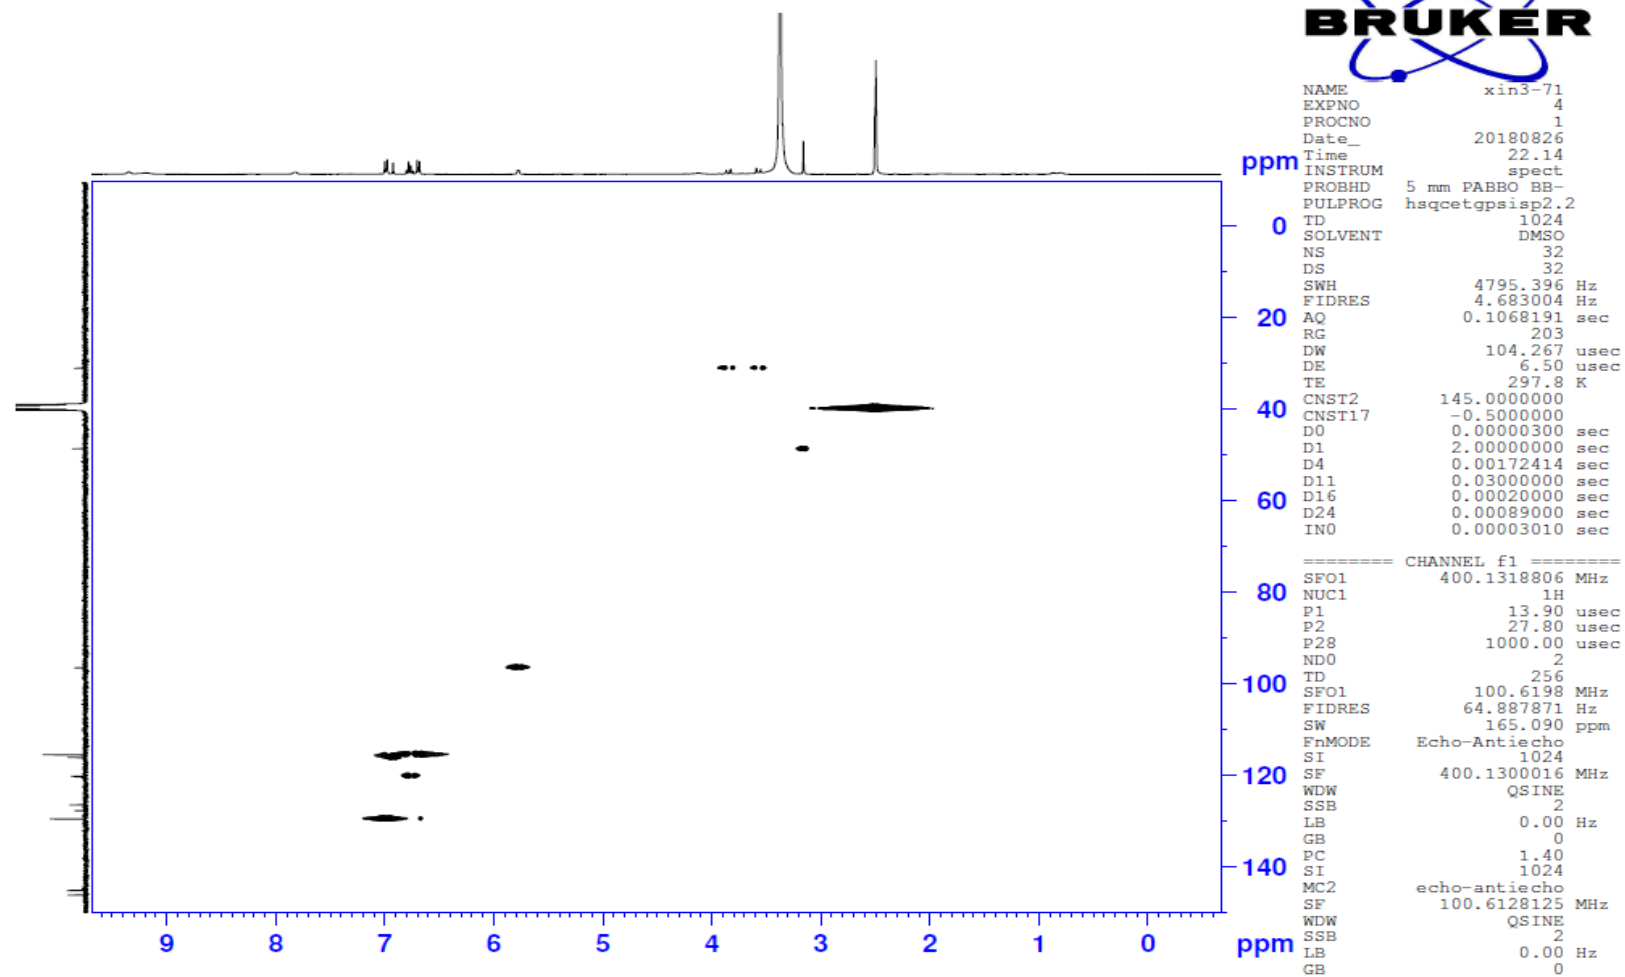Figure S39. HSQC NMR spectrum of **7** in DMSO- $d_6$ .

xin3-71-COSY

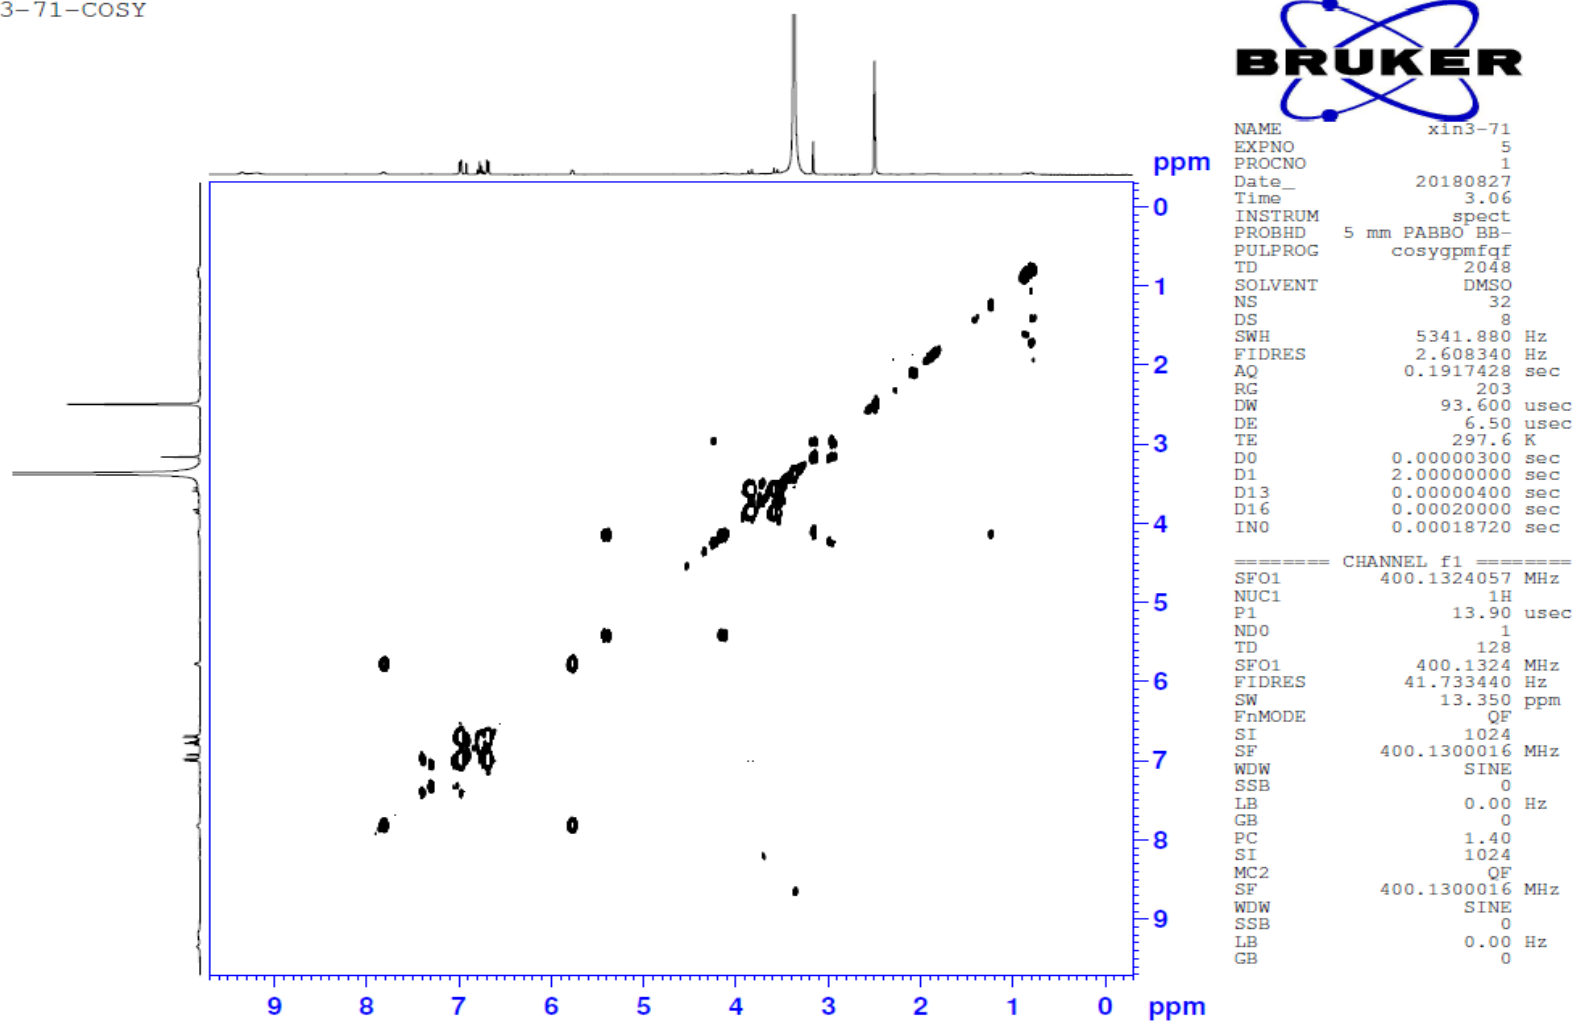Figure S40. COSY NMR spectrum of **7** in DMSO-*d*<sub>6</sub>.

xin3-71-BC

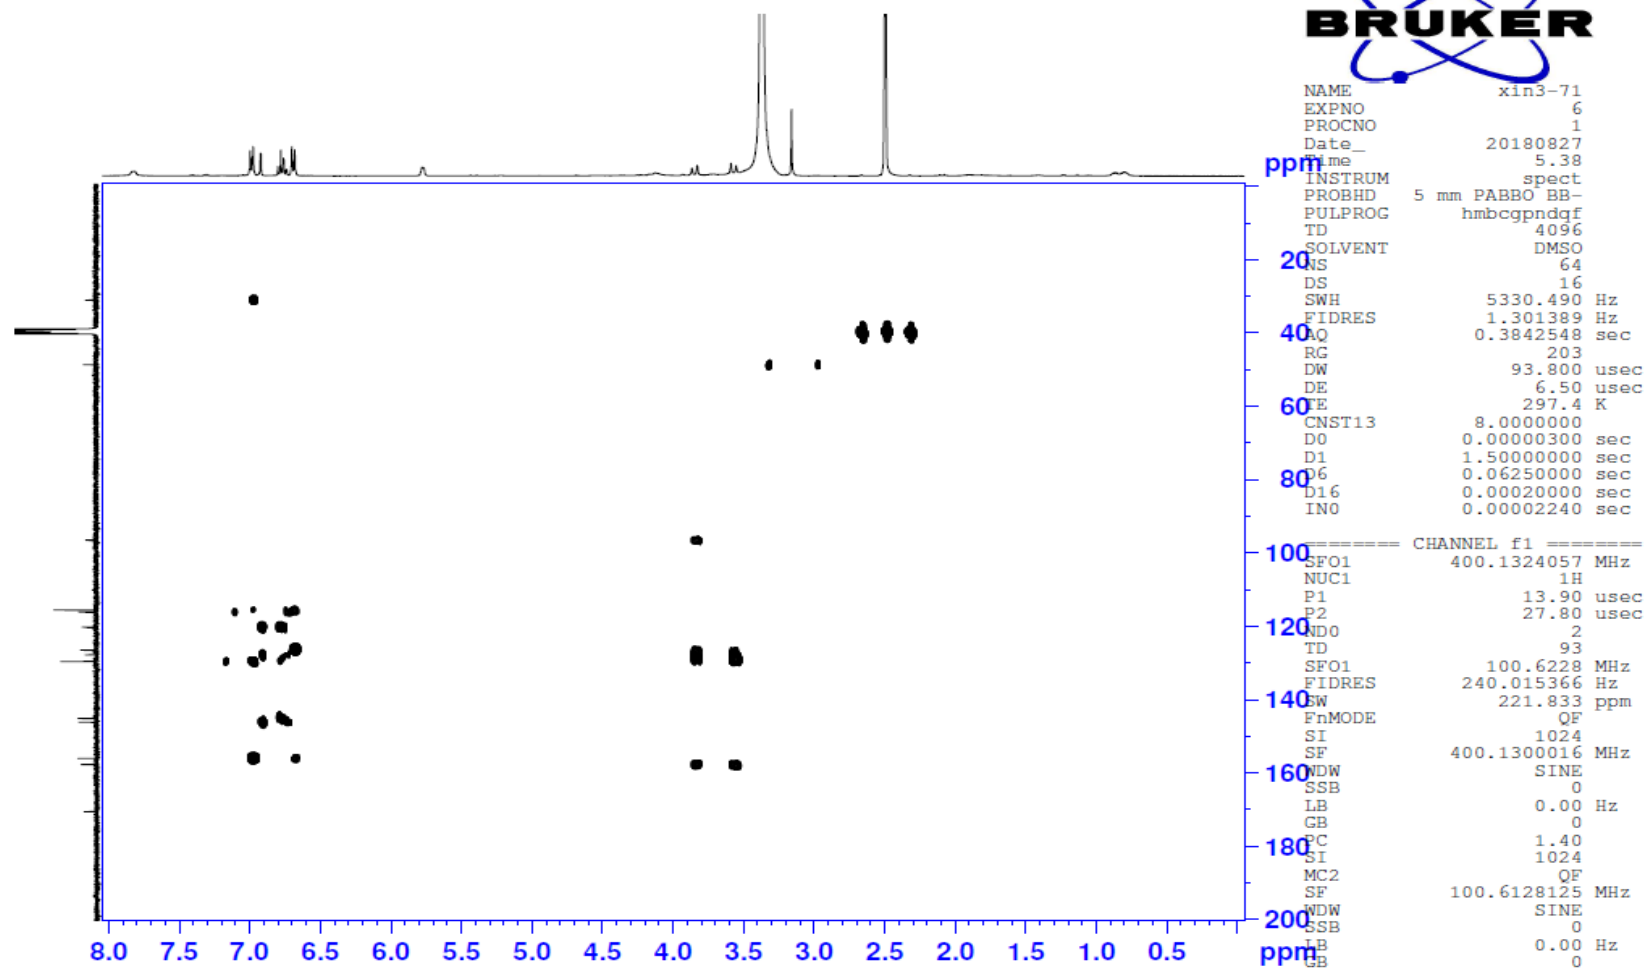**Figure S41.** HMBC NMR spectrum of **7** in DMSO-*d*<sub>6</sub>.

xin3-71-NOE

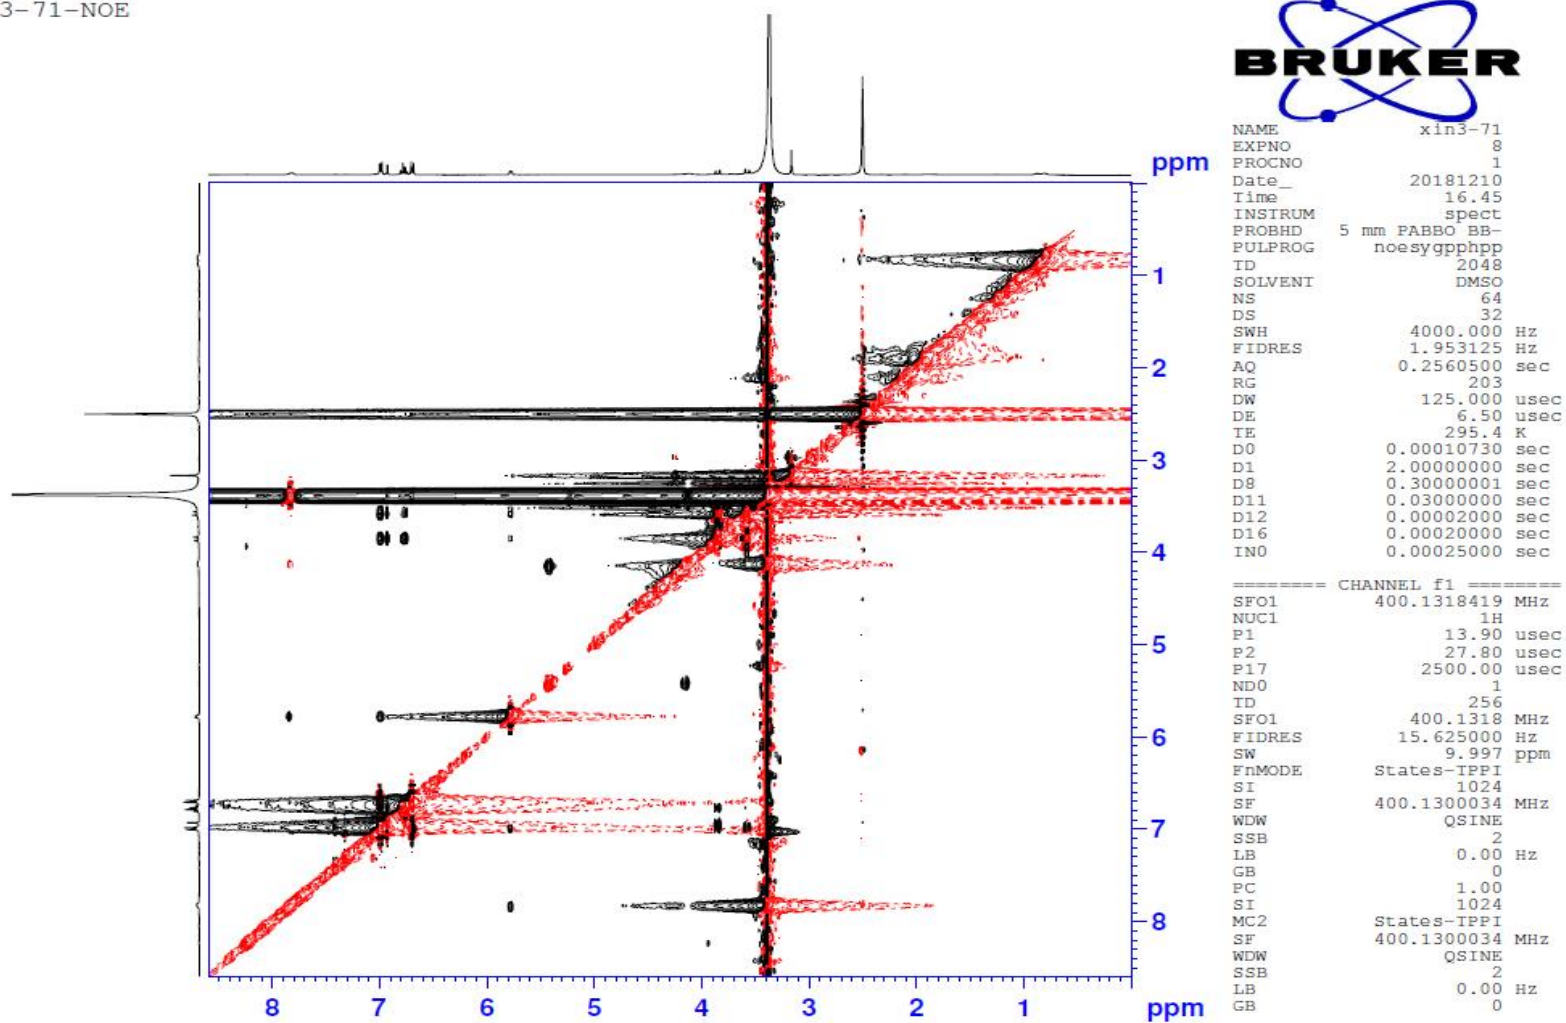Figure S42. NOESY NMR spectrum of **7** in DMSO- $d_6$ .

xin3-76 H

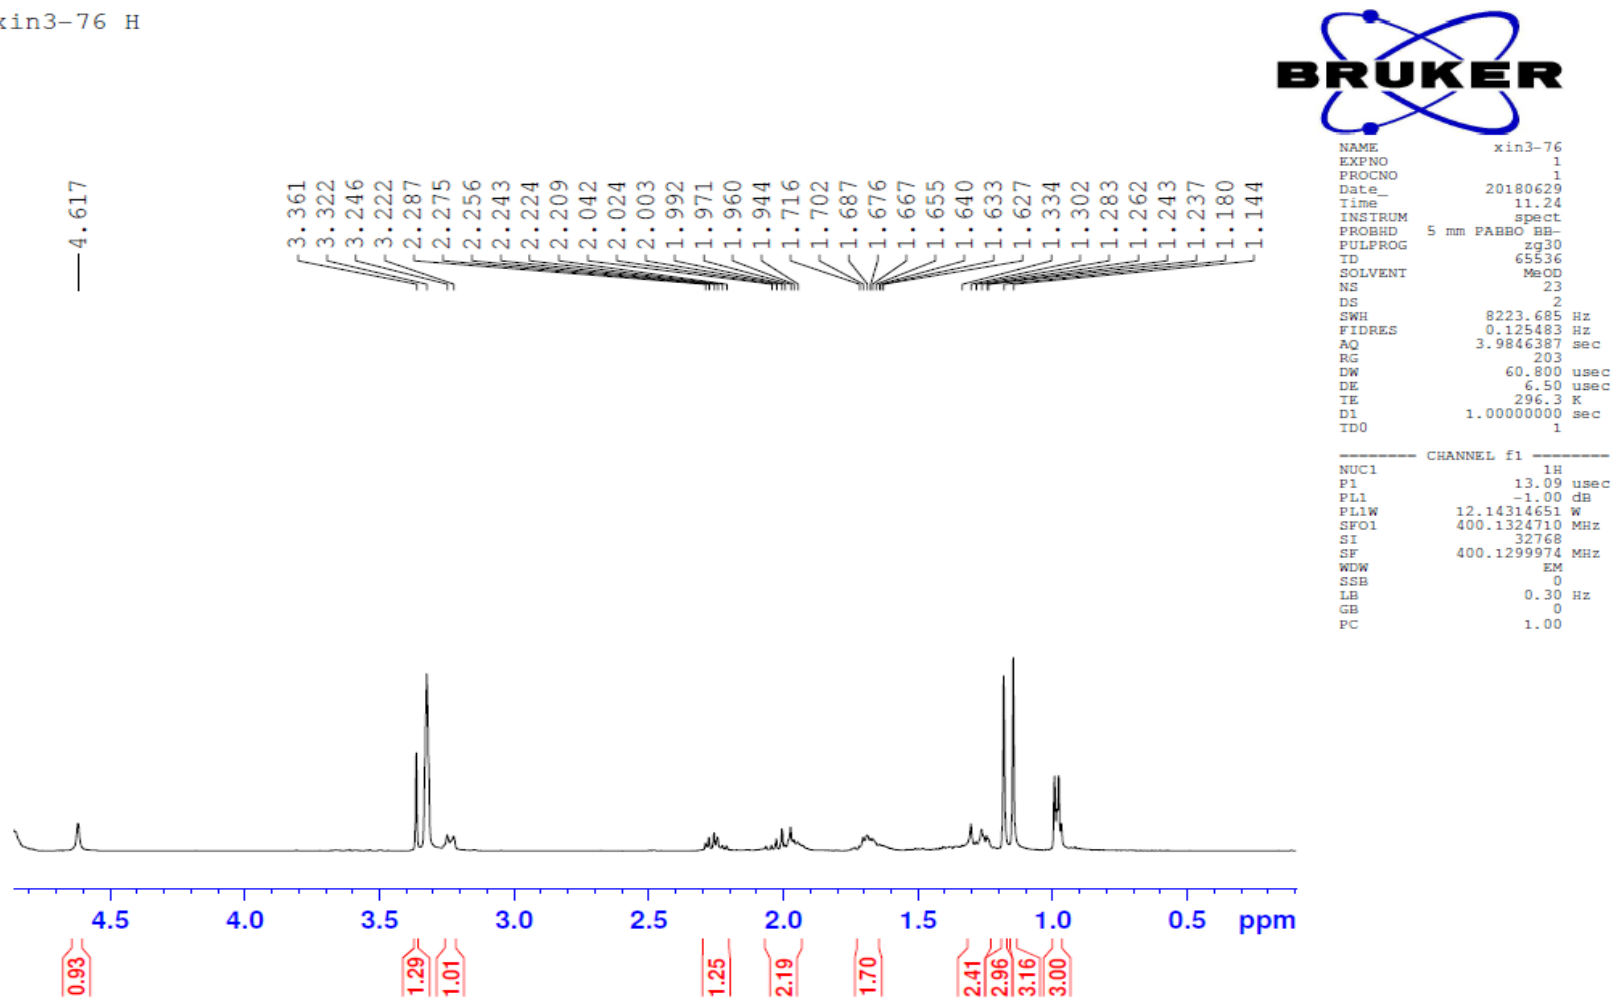Figure S43.  $^1\text{H}$  NMR spectrum of **8** in  $\text{CD}_3\text{OD}$ .

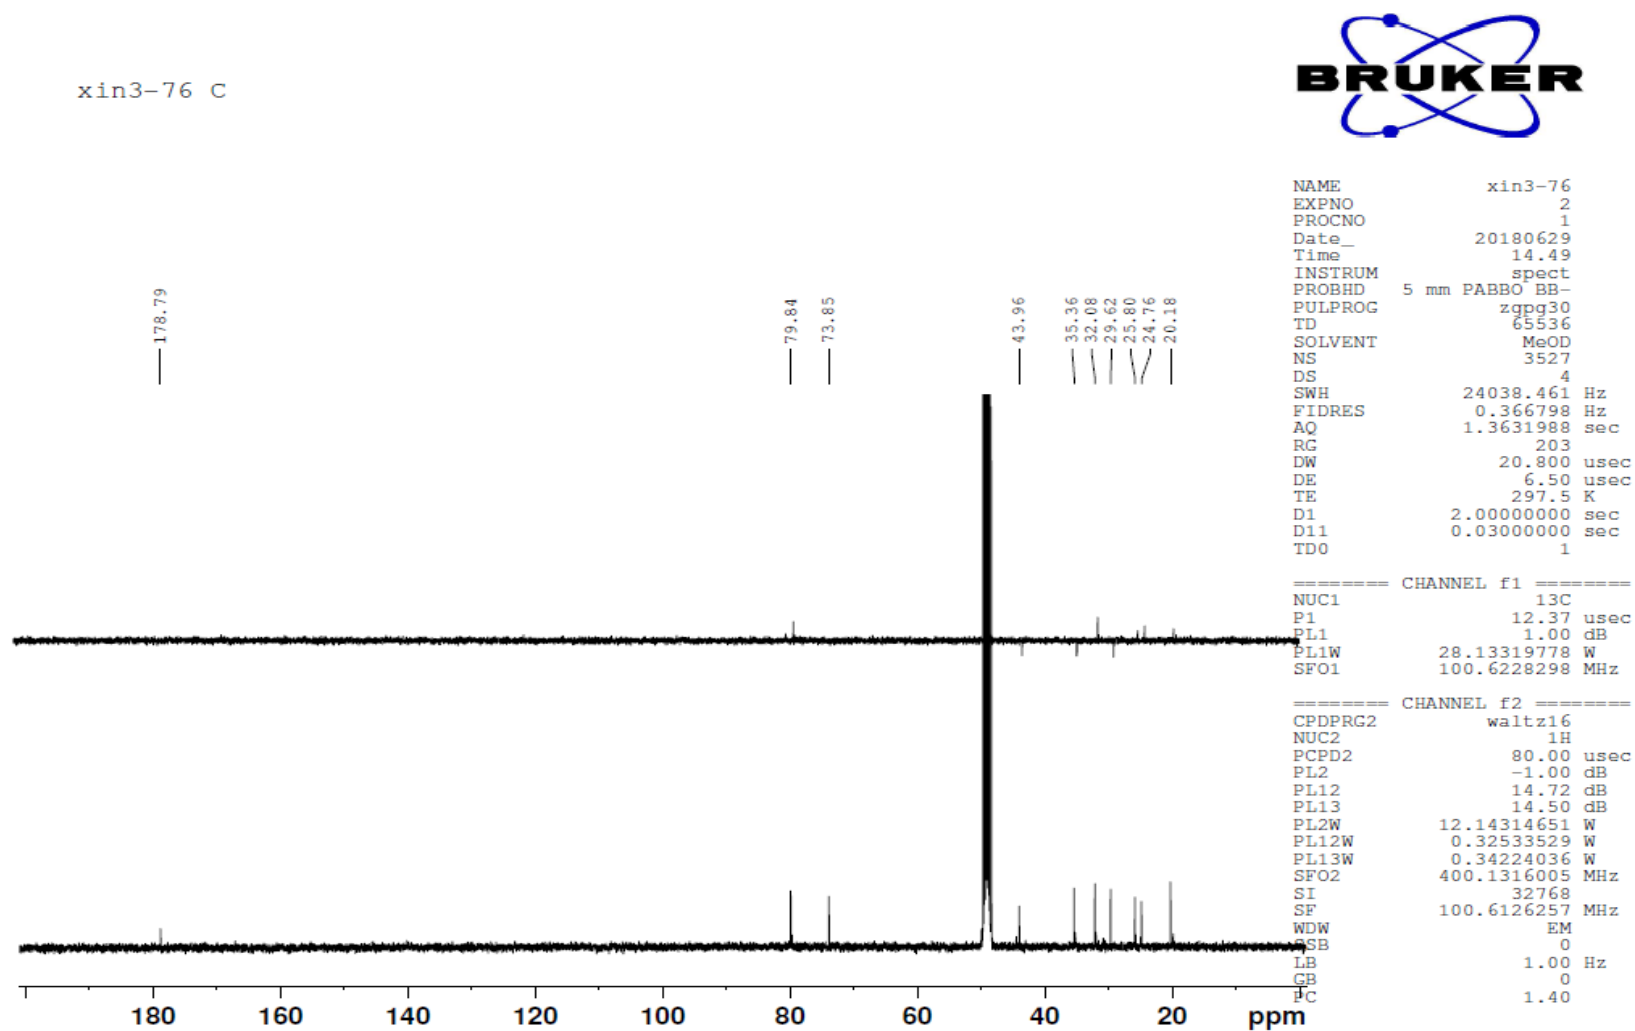

**Figure S44.**  $^{13}\text{C}$  NMR spectrum of **8** in  $\text{CD}_3\text{OD}$ .

xin3-76-QC

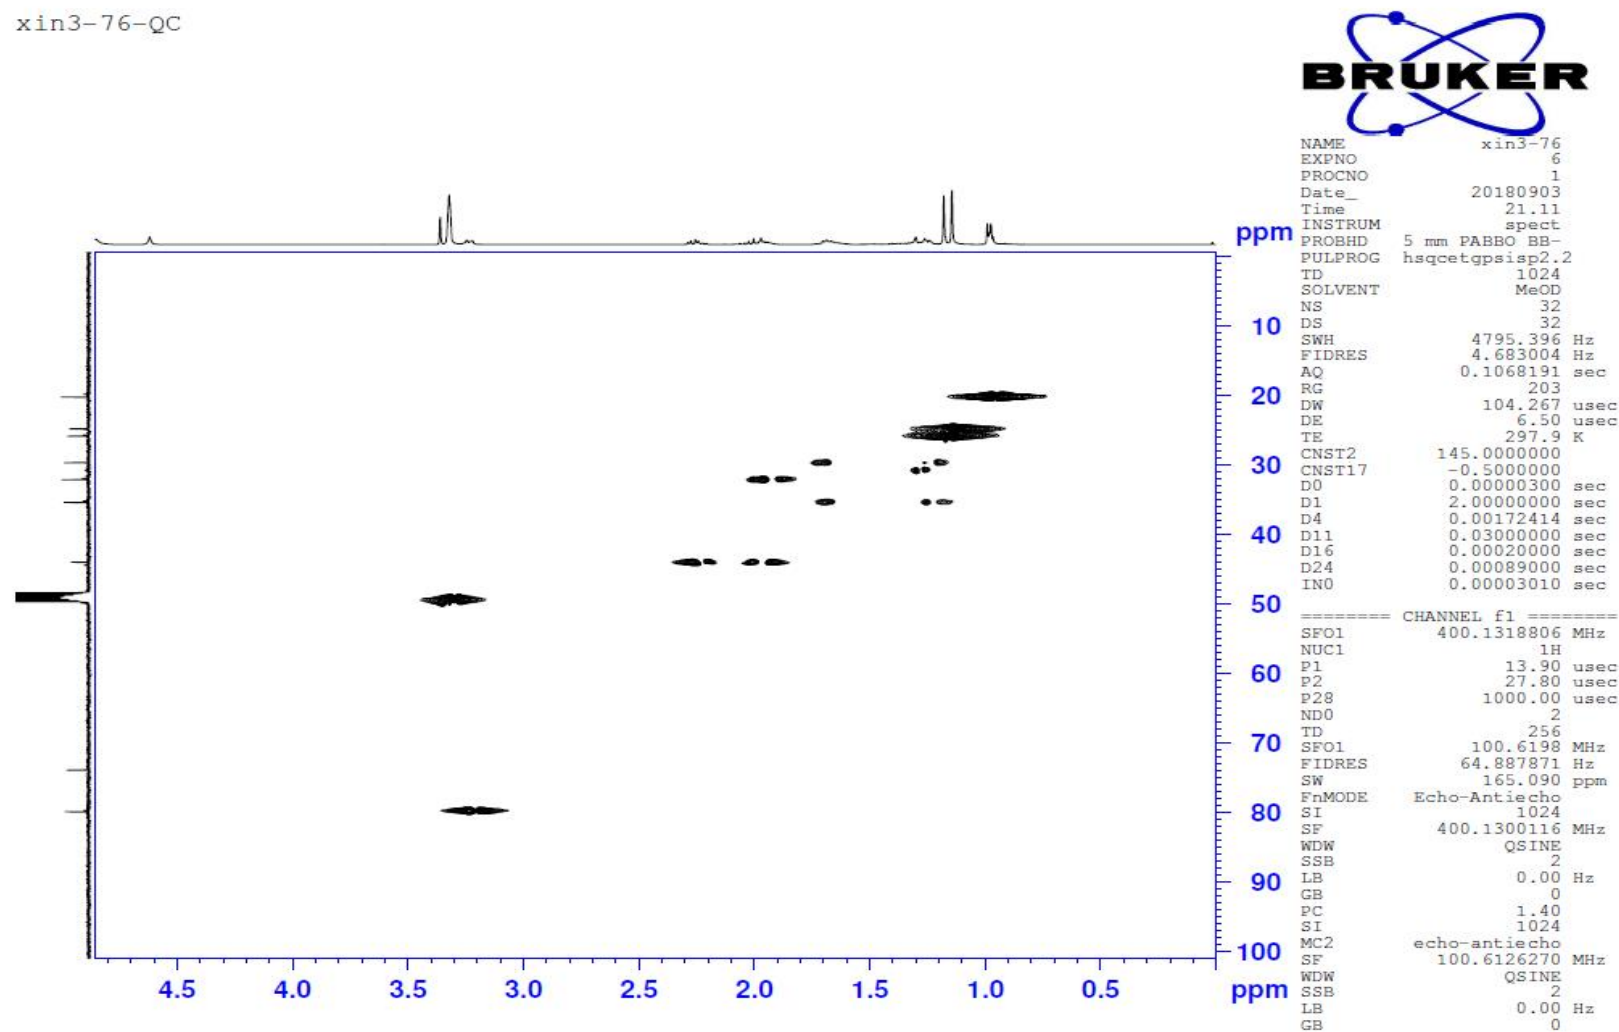Figure S45. HSQC NMR spectrum of **8** in CD<sub>3</sub>OD.

xin3-76-COSY

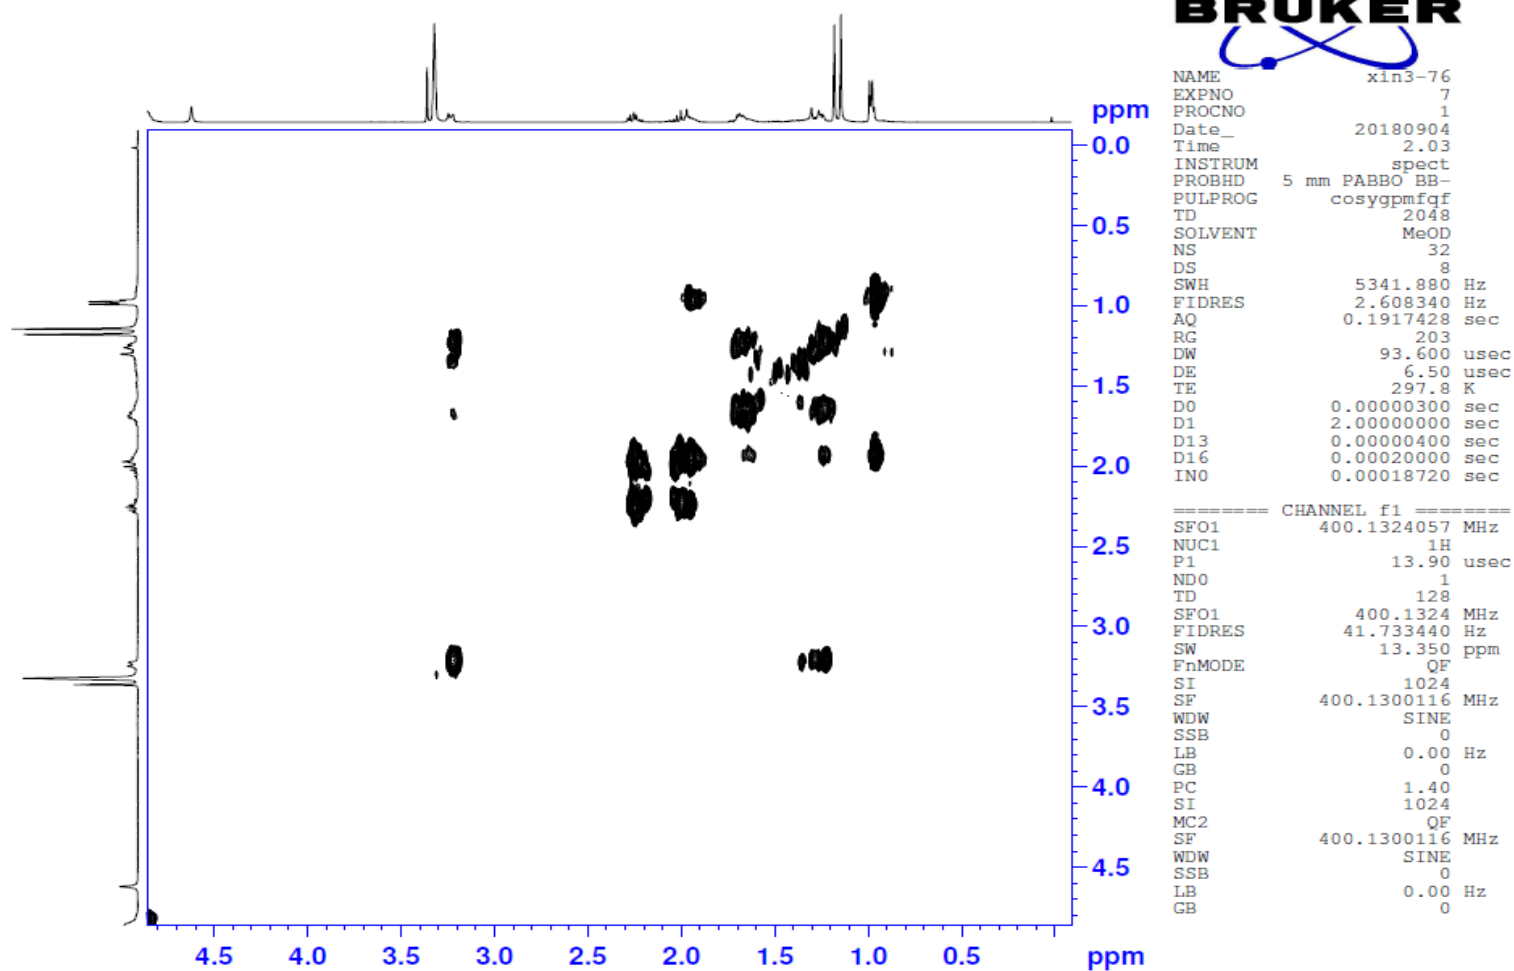Figure S46. COSY NMR spectrum of **8** in CD<sub>3</sub>OD.



xin3-76-BC

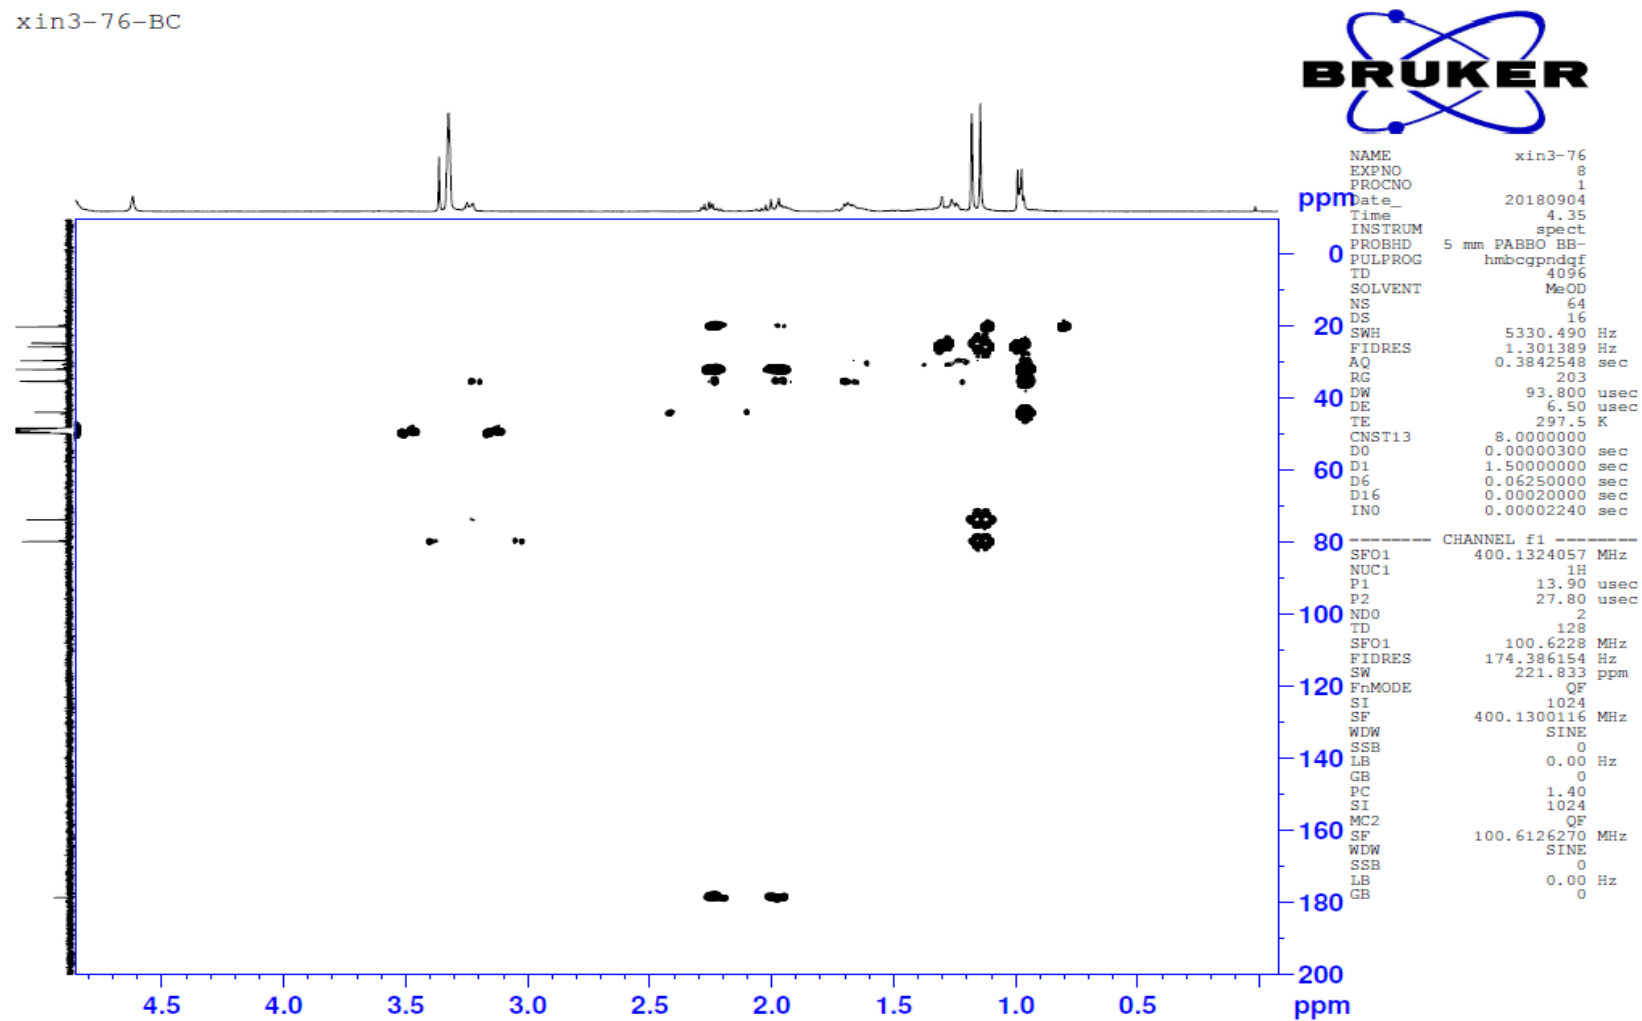Figure S47. HMBC NMR spectrum of **8** in CD<sub>3</sub>OD.

xin3-76-NOE

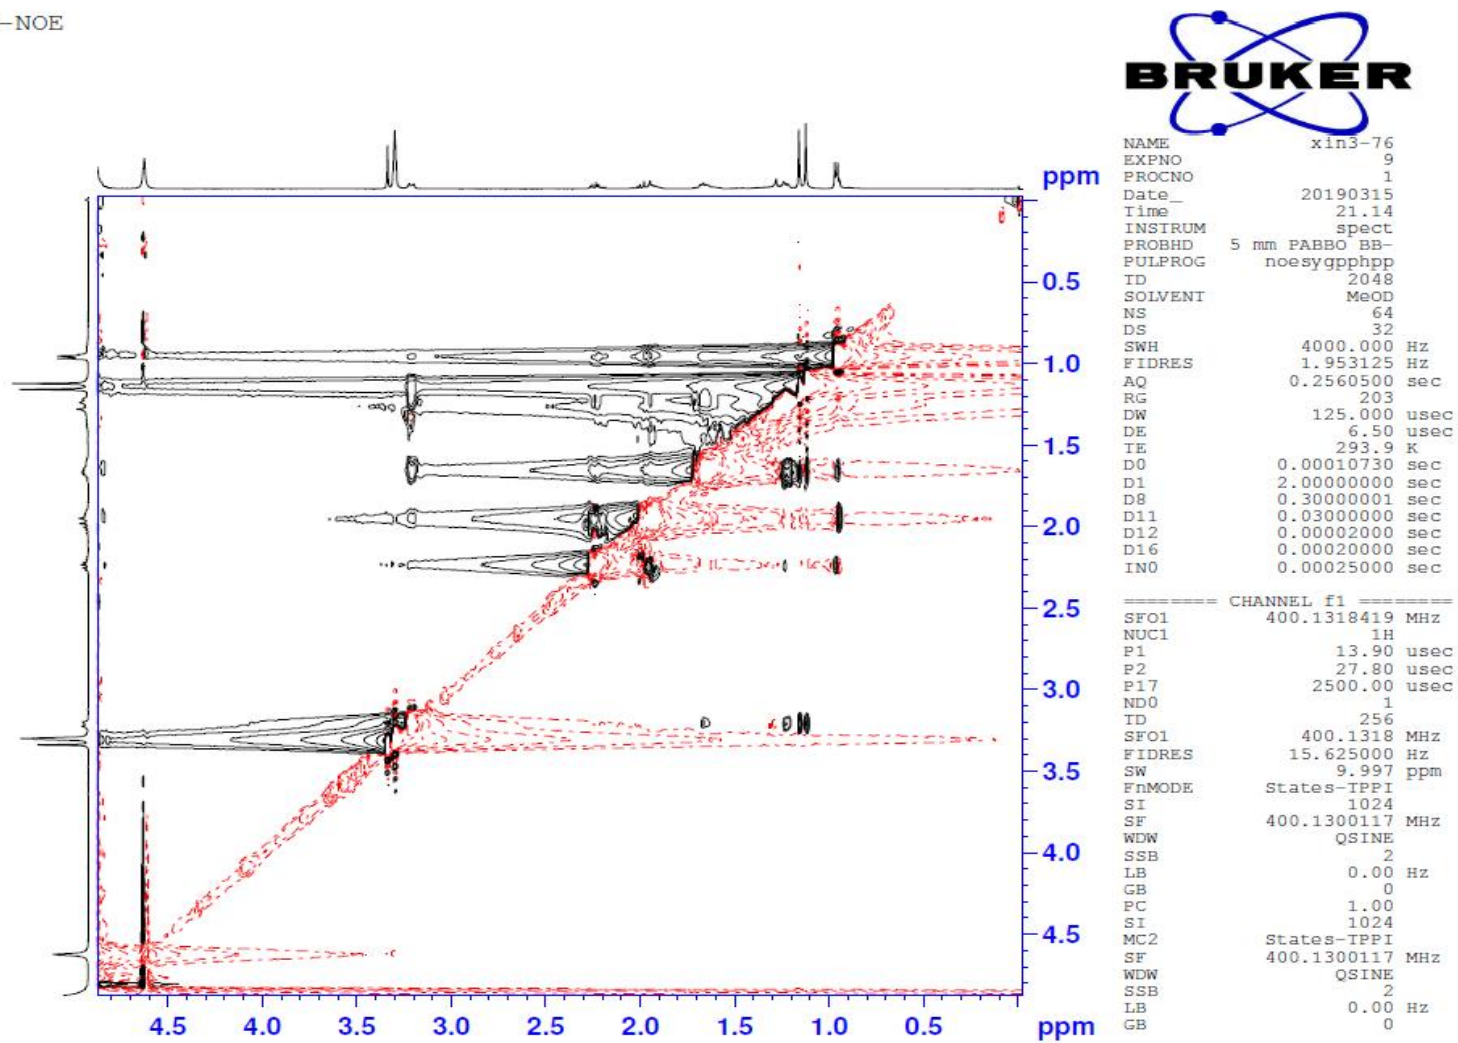Figure S48. NOESY NMR spectrum of **8** in CD<sub>3</sub>OD.

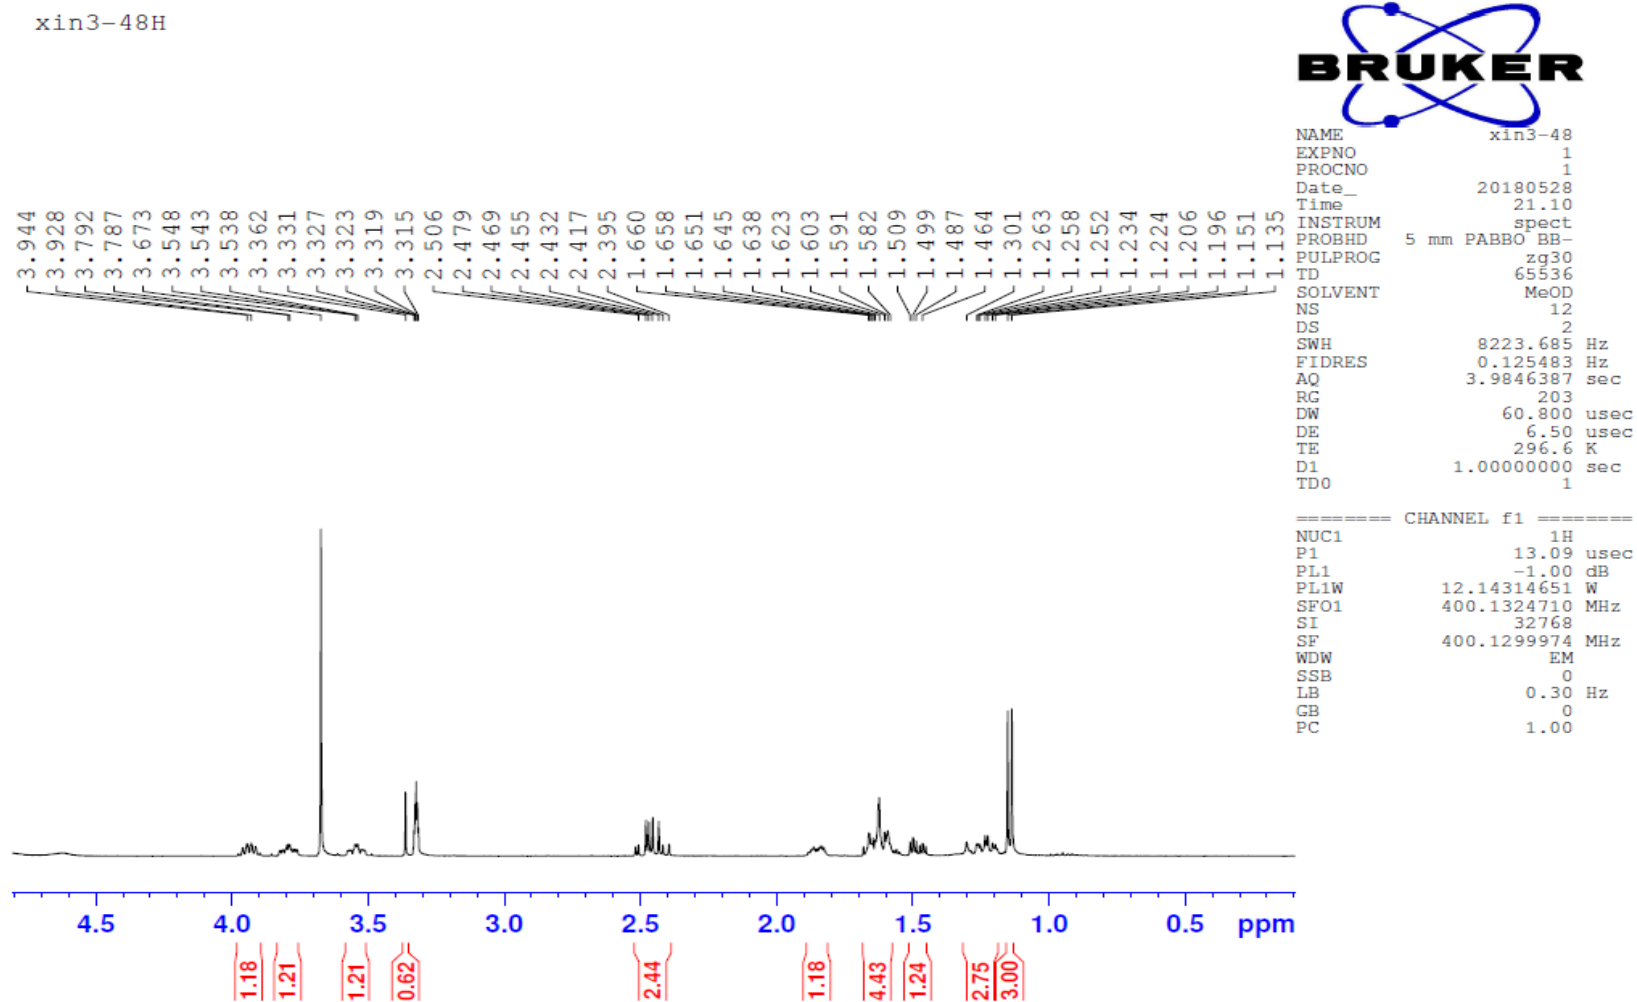Figure S49.  $^1\text{H}$  NMR spectrum of **9** in  $\text{CD}_3\text{OD}$ .

xin3-48 C

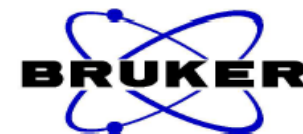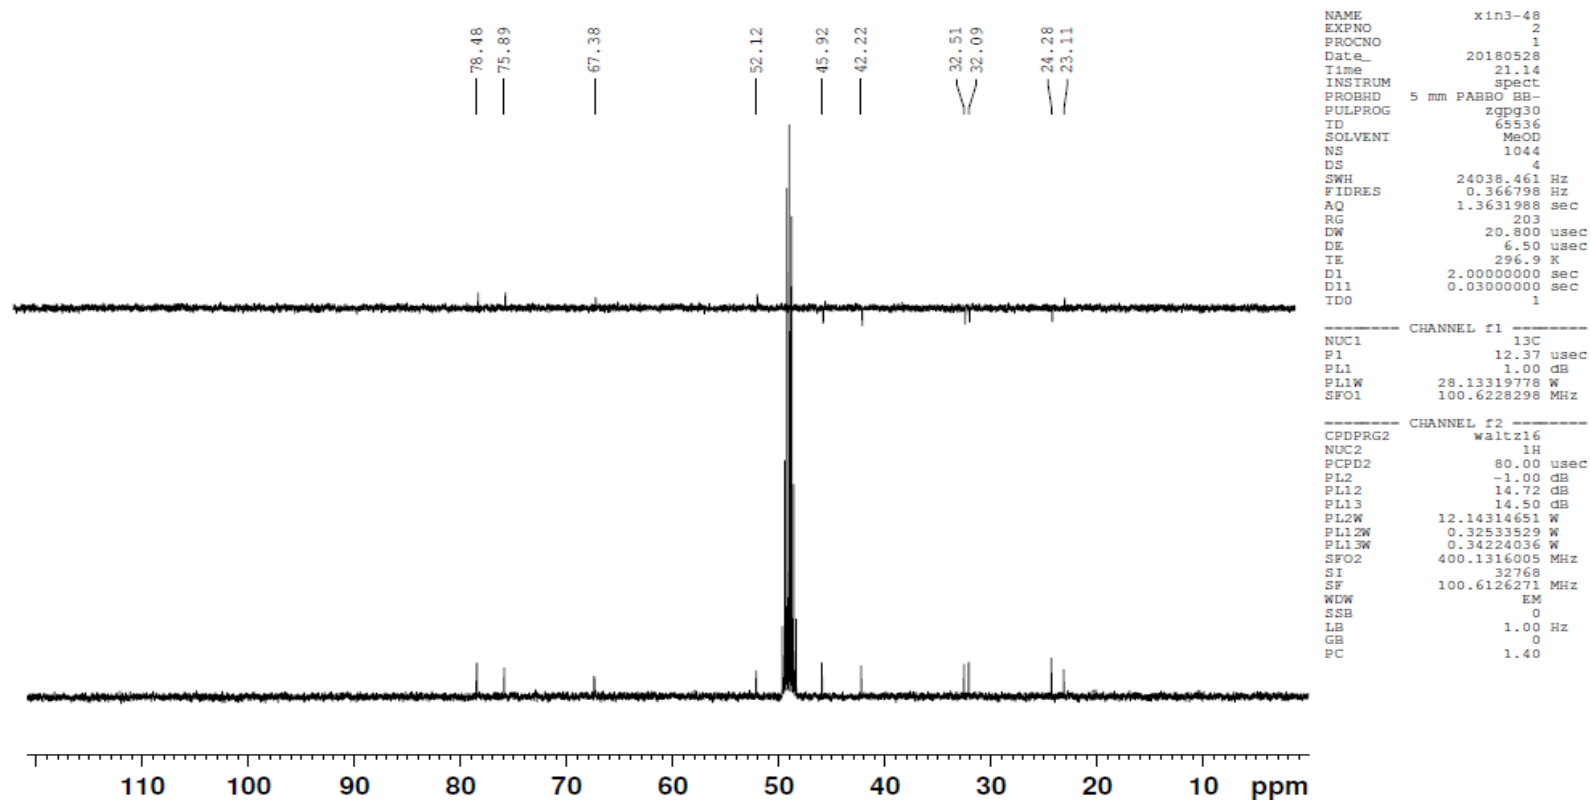Figure S50.  $^{13}\text{C}$  NMR spectrum of **9** in  $\text{CD}_3\text{OD}$ .

xin3-48-QC

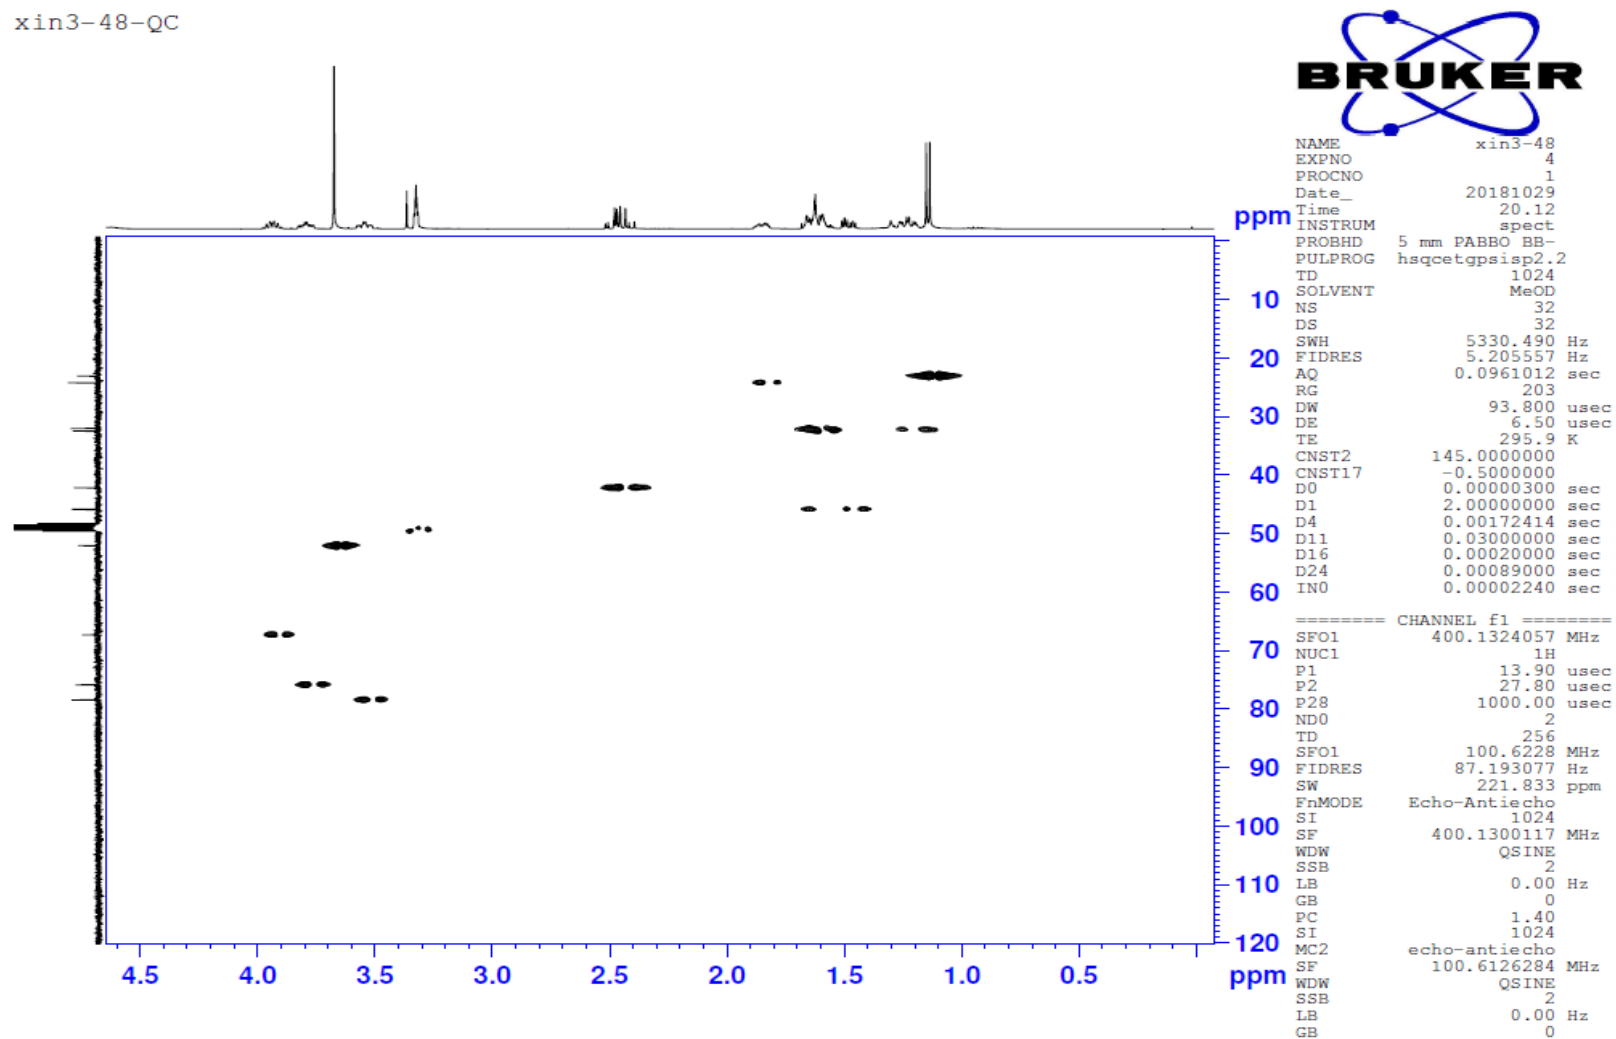Figure S51. HSQC NMR spectrum of **9** in CD<sub>3</sub>OD.

xin3-48-COSY

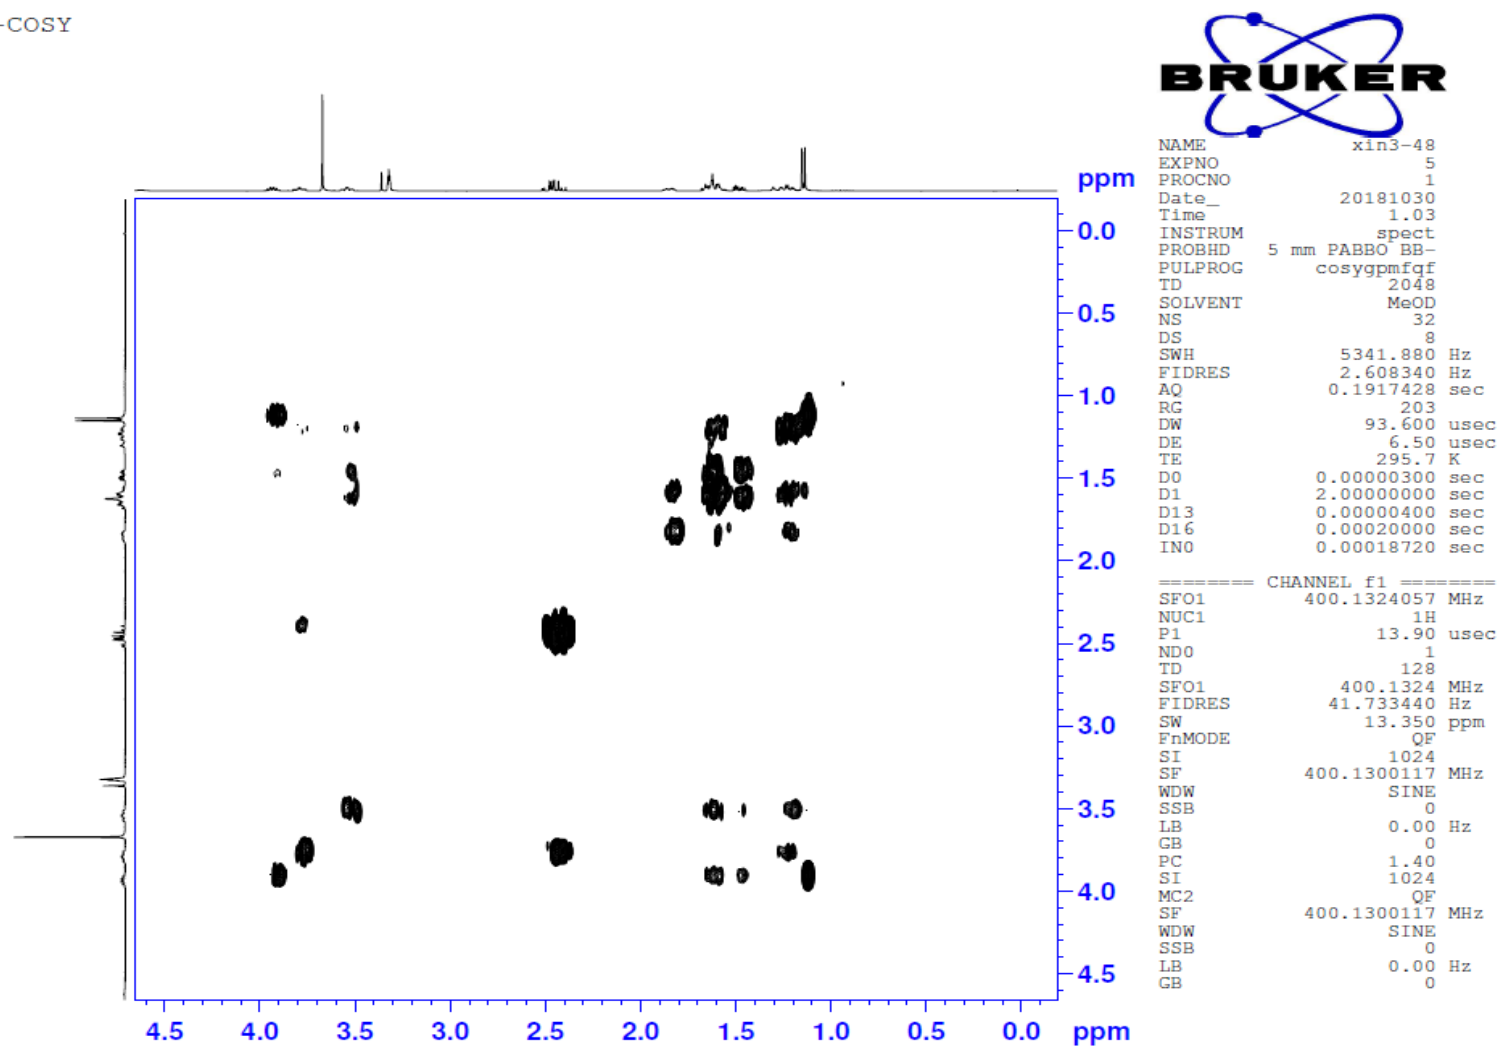Figure S52. COSY NMR spectrum of **9** in CD<sub>3</sub>OD.

xin3-48-BC

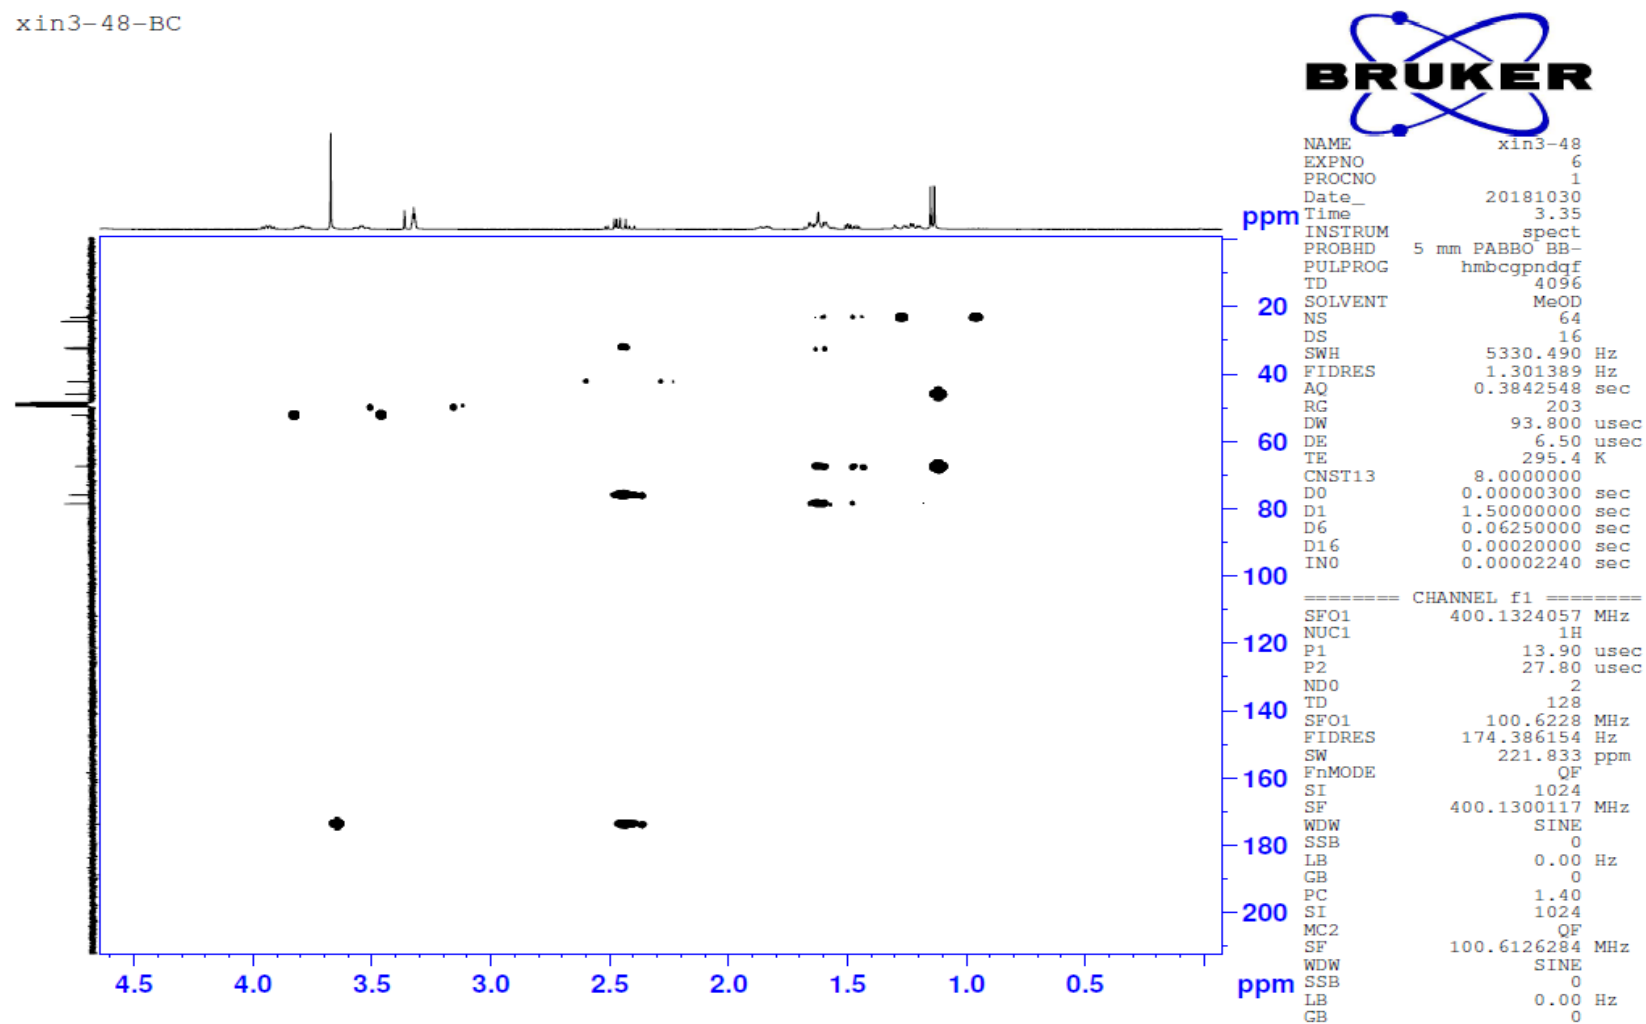Figure S53. HMBC NMR spectrum of **9** in CD<sub>3</sub>OD.

xin3-48-NOE

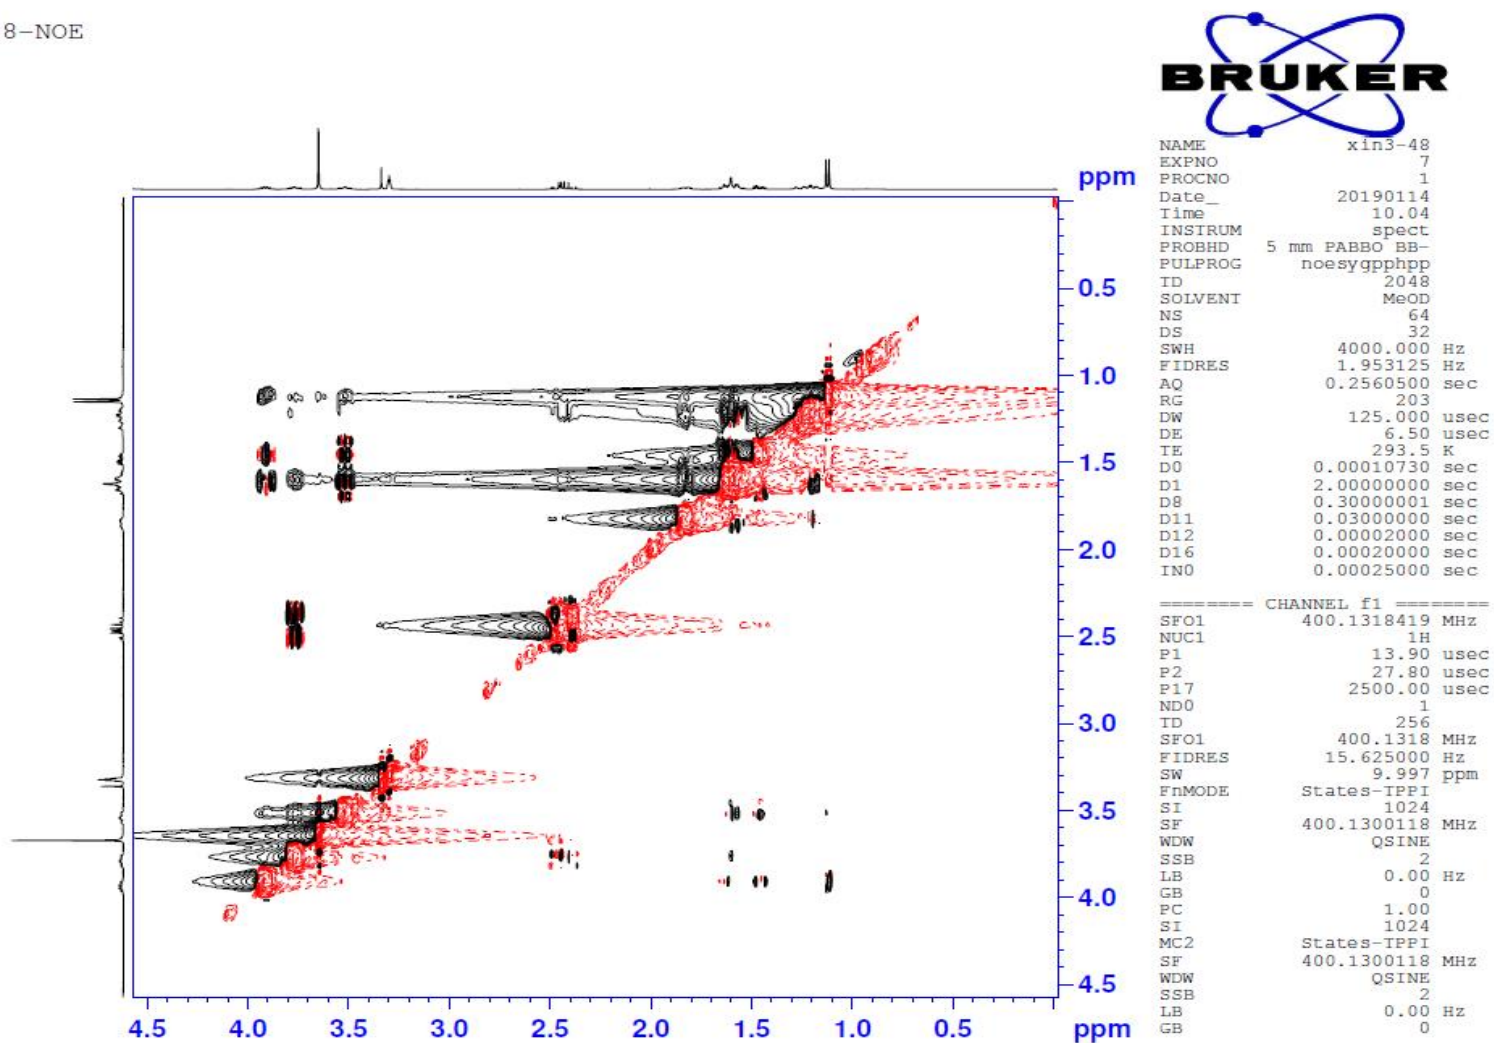Figure S54. NOESY NMR spectrum of **9** in CD<sub>3</sub>OD.



xin3-82-H

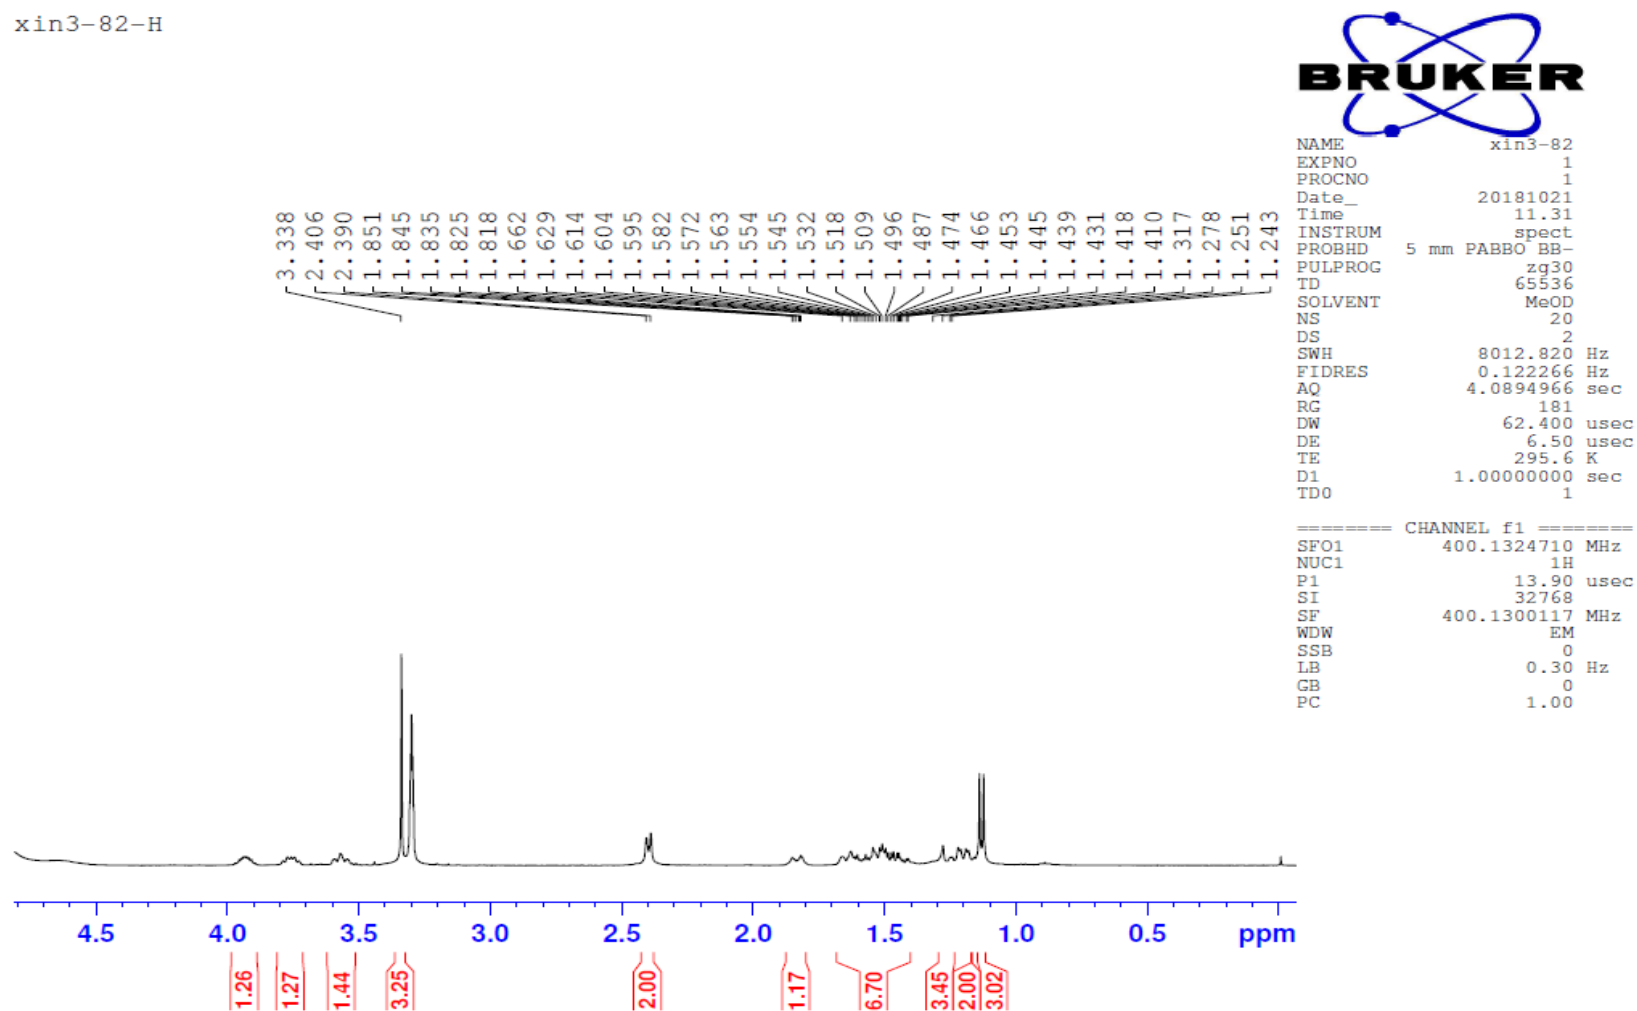Figure S55.  $^1\text{H}$  NMR spectrum of **10** in  $\text{CD}_3\text{OD}$ .

xin3-82-C

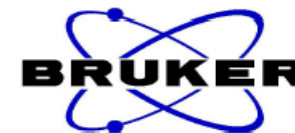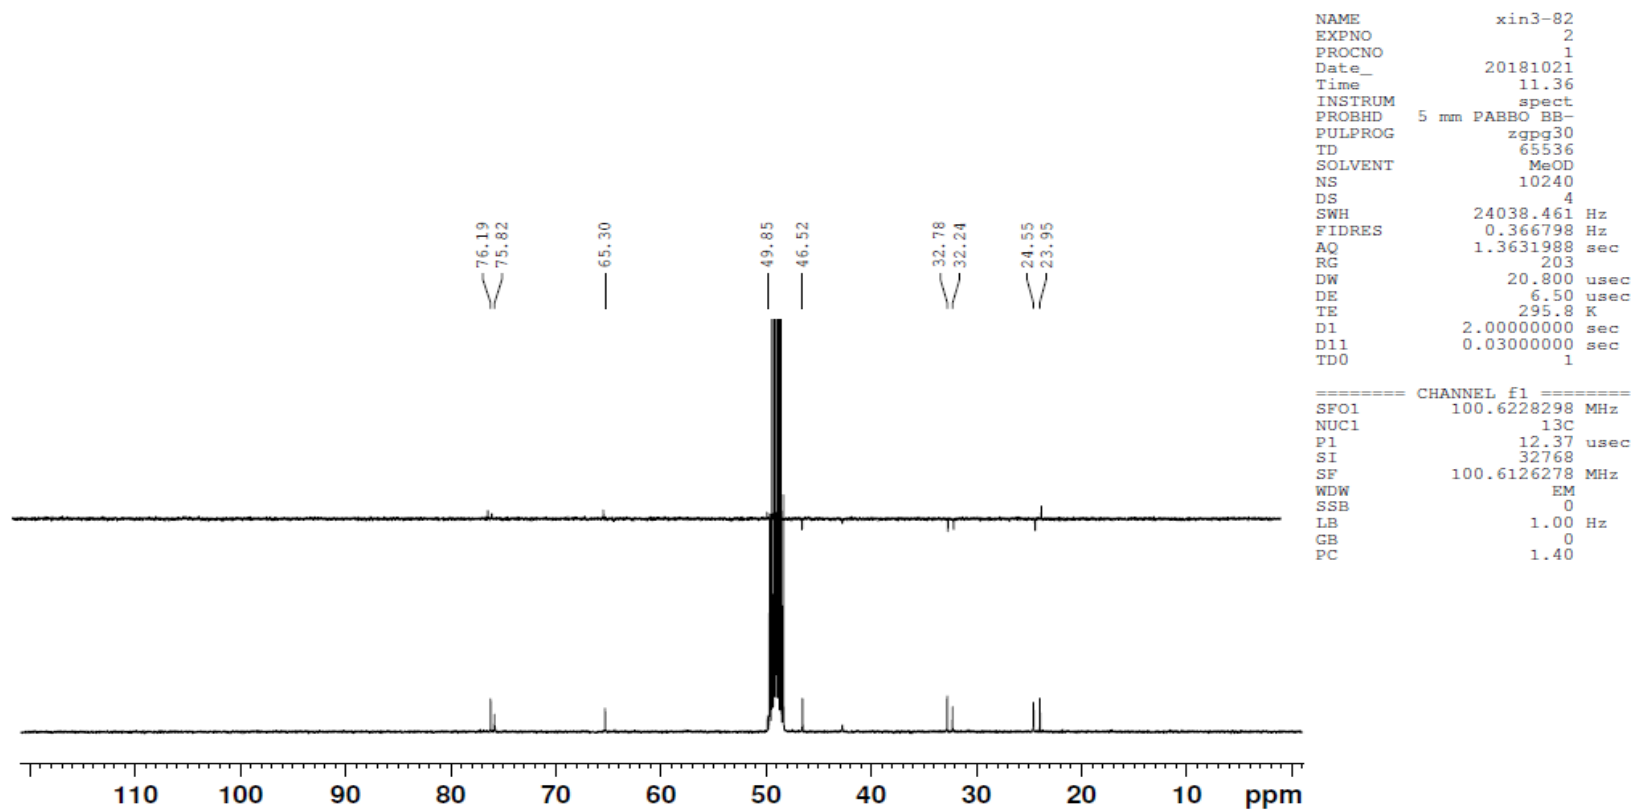**Figure S56.** <sup>13</sup>C NMR spectrum of **10** in CD<sub>3</sub>OD.

xin3-82-qc

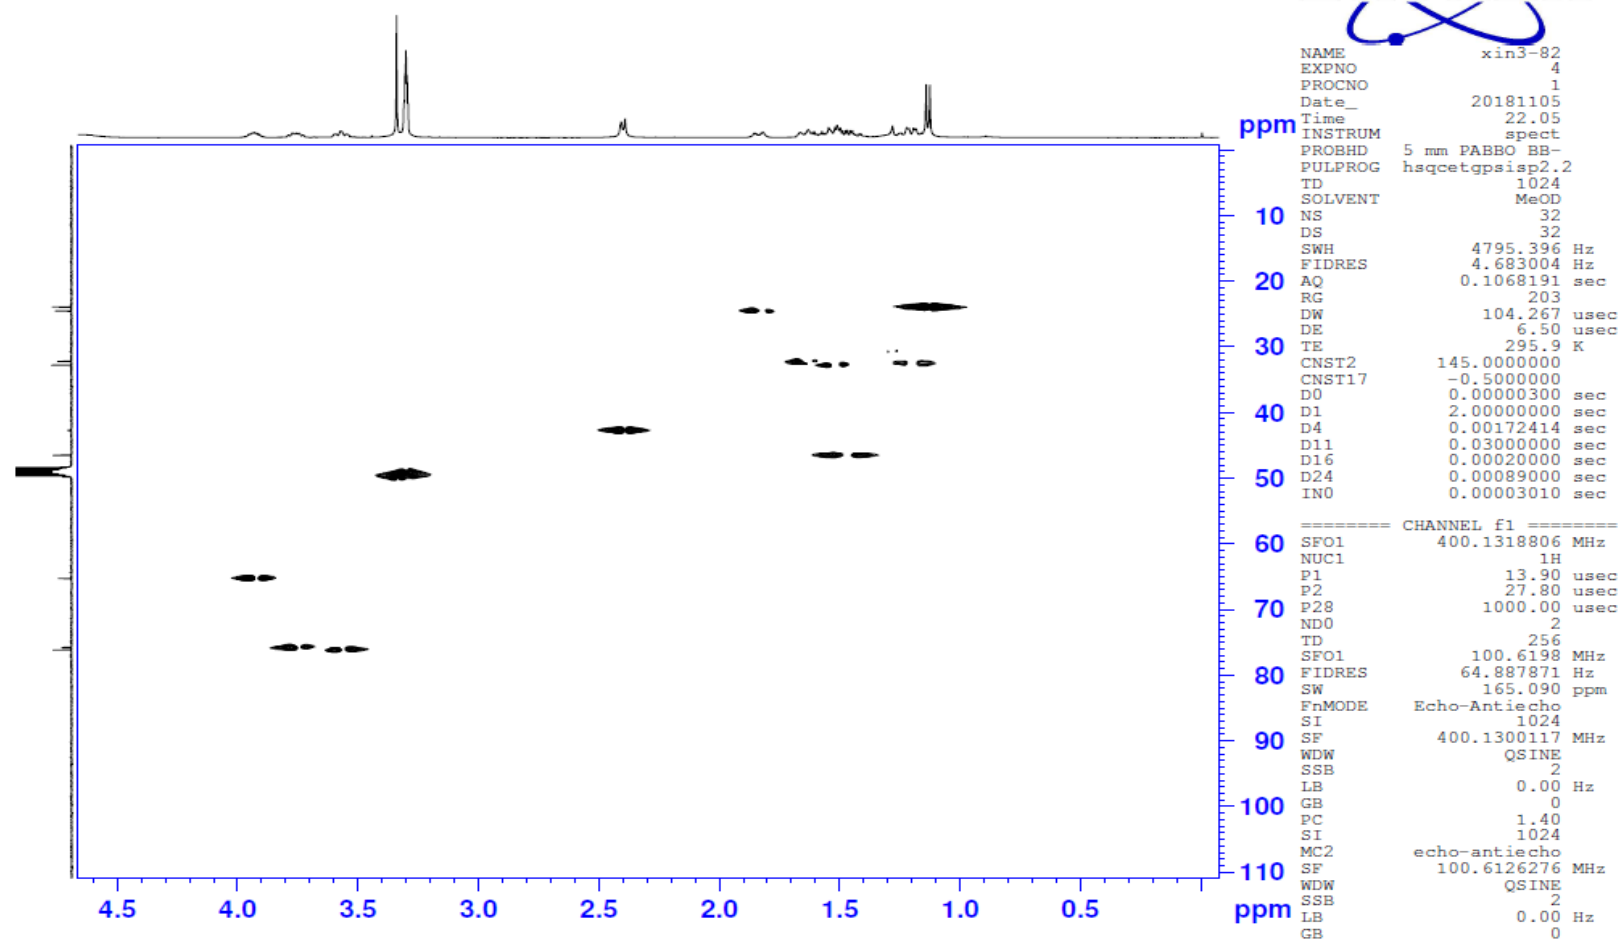Figure S57. HSQC NMR spectrum of **10** in CD<sub>3</sub>OD.

xin3-82-cosy

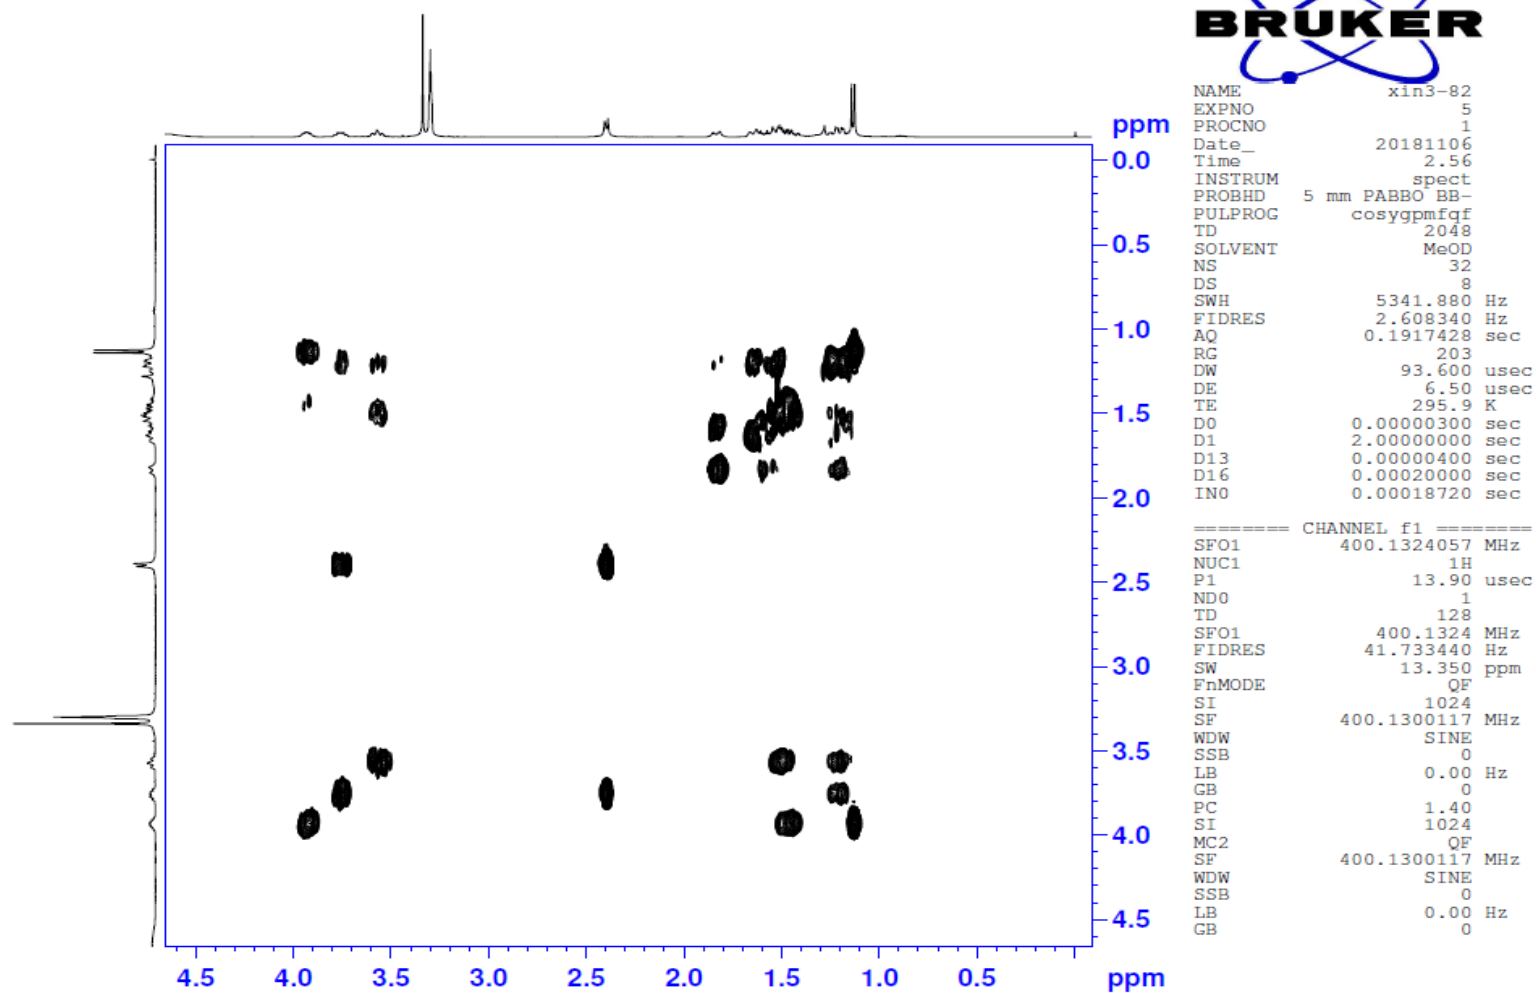Figure S58. COSY NMR spectrum of **10** in CD<sub>3</sub>OD.

xin3-82-bc

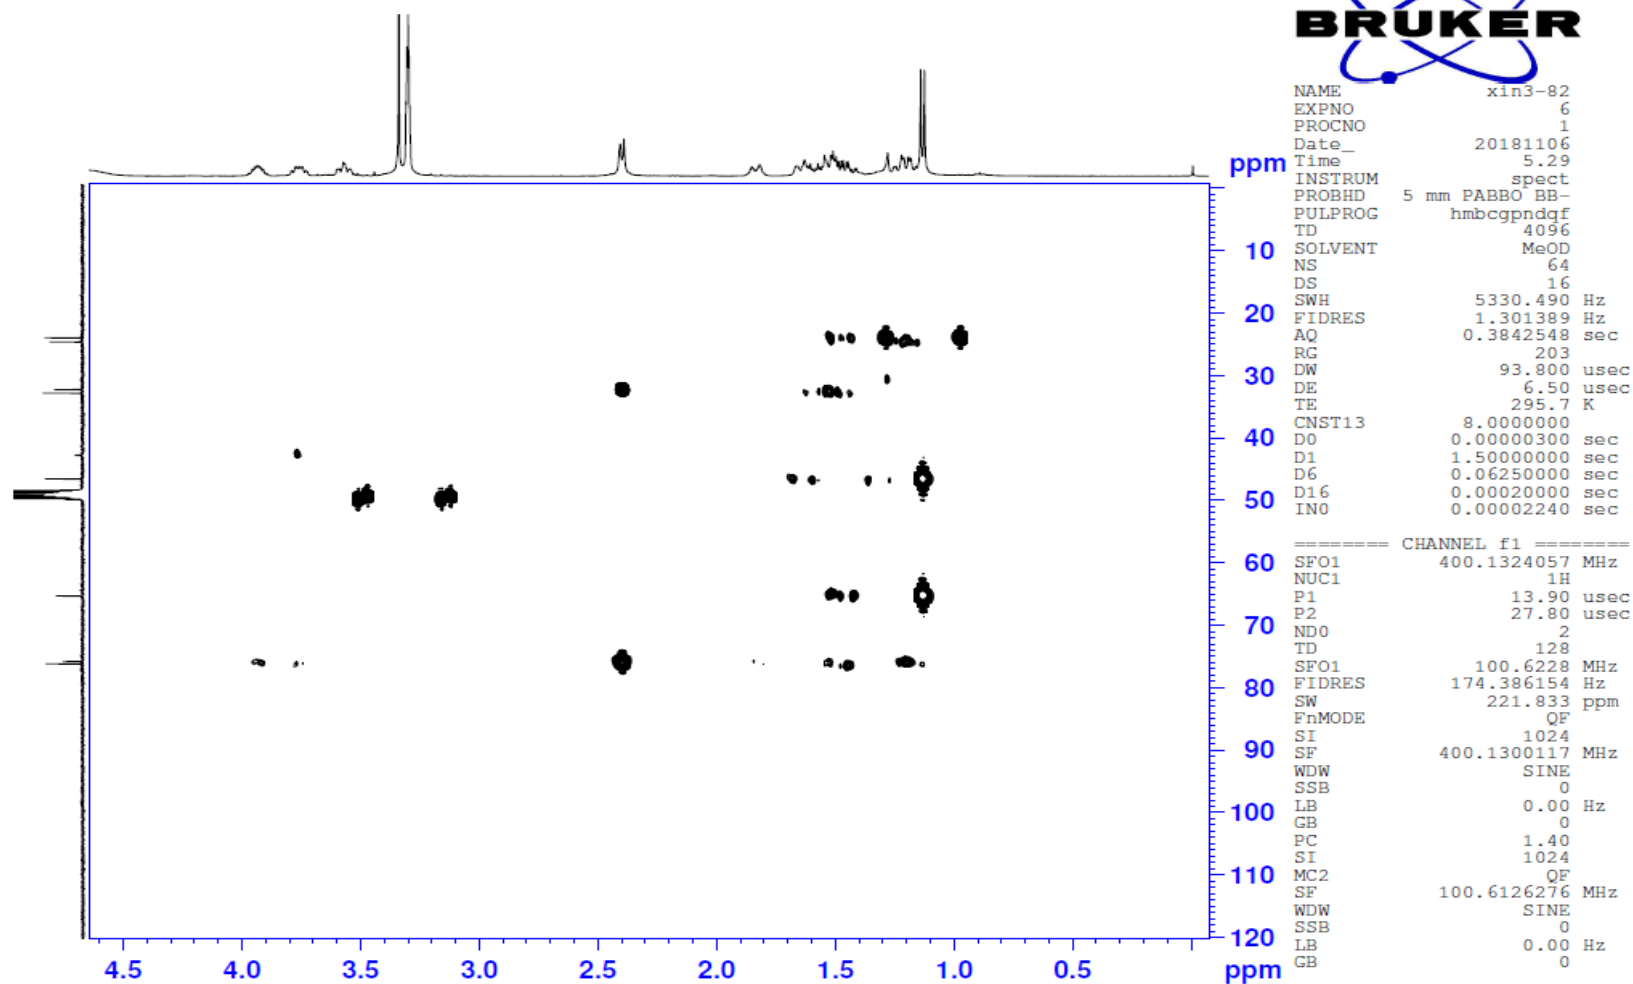Figure S59. HMBC NMR spectrum of **10** in CD<sub>3</sub>OD.

xin3-82-noe

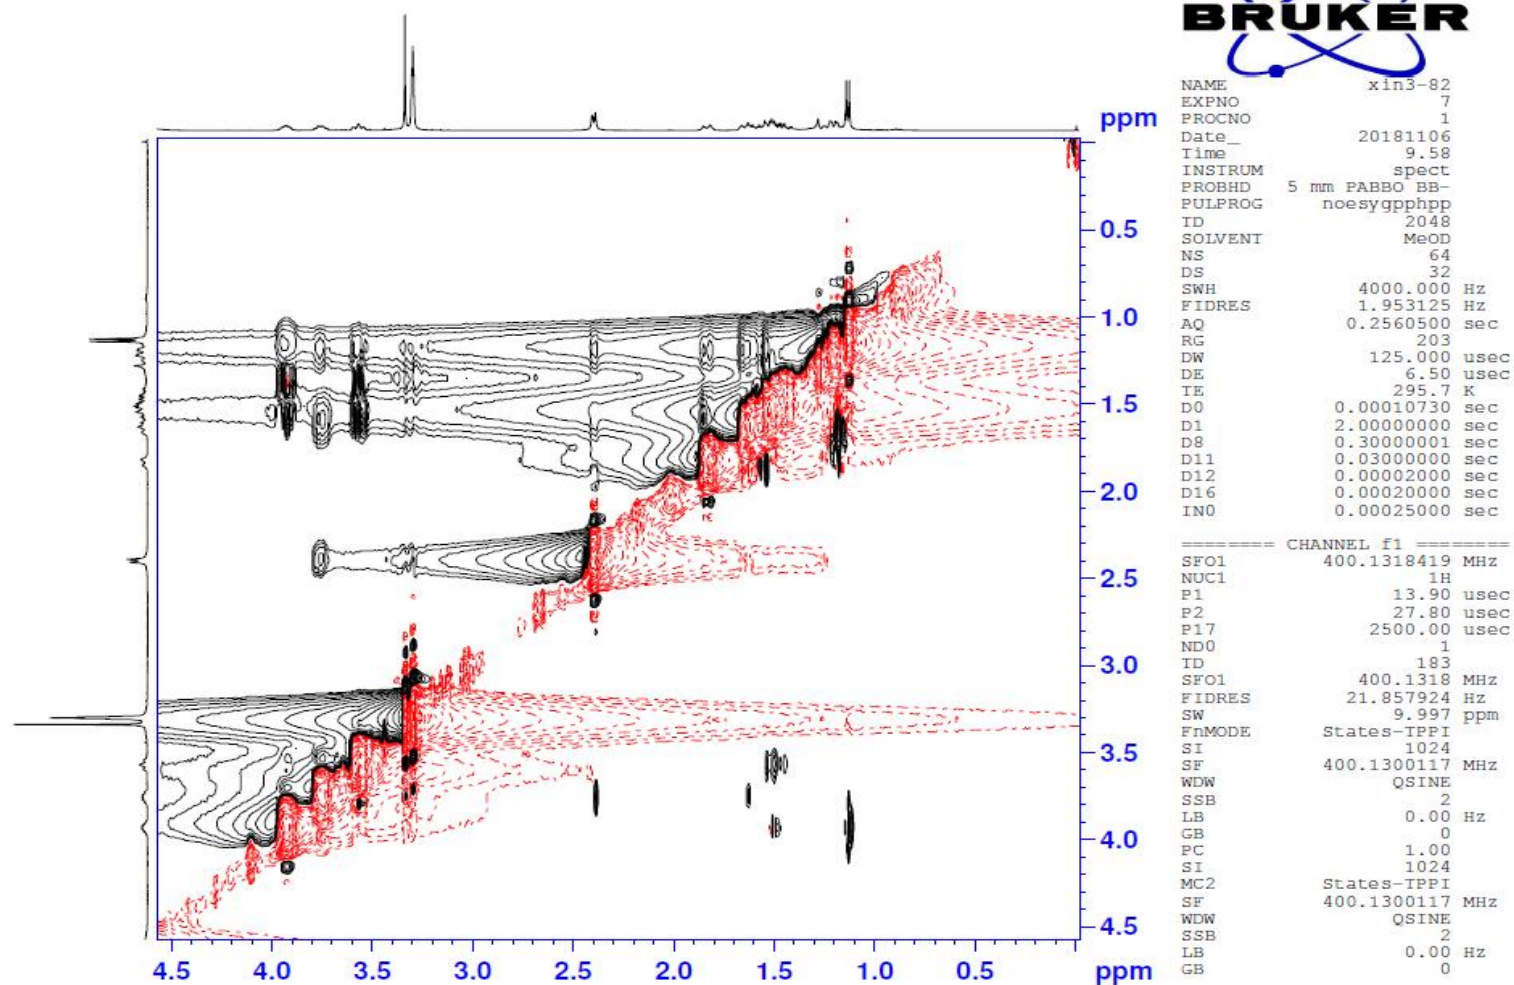Figure S60. NOESY NMR spectrum of **10** in CD<sub>3</sub>OD.
